# Supplementary material
Source: PubMed Central journal article supplement (PMC3605822)
Supplement: cn300170x_si_001.pdf [file cn300170x_si_001.pdf]

# Supporting Information

## Cellular polyamines promote amyloid-beta (A $\beta$ ) peptide fibrillation and modulate the aggregation pathways

Jinghui Luo, Chien-Hung Yu, Huixin Yu, Rok Borstnar, Shina C.L. Kamerlin, Astrid Gräslund, Jan Pieter Abrahams & Sebastian K.T.S. Wärmländer

|                                                                                                                                                          |     |
|----------------------------------------------------------------------------------------------------------------------------------------------------------|-----|
| Supporting Information Figure S1: Chemical structures of spermine, spermidine, and putrescine                                                            | S2  |
| Supporting Information Figure S2: Chemical shift differences in NMR spectrum of A $\beta$ (1-40) induced by spermine and putrescine                      | S2  |
| Supporting Information Figure S3. HSQC NMR spectra of spermine with and without A $\beta$ (1-40)                                                         | S3  |
| Supporting Information Figure S4. 1D NMR spectra of spermine with and without A $\beta$ (1-40)                                                           | S3  |
| Supporting Information Figure S5. ThT fluorescence curves of A $\beta$ (1-40) incubated with putrescine, with and without EDTA present                   | S4  |
| Supporting Information Figure S6. ThT fluorescence curves of A $\beta$ (1-40) incubated with various polyamines and different salt (NaCl) concentrations | S4  |
| Supporting Information Figure S7: Modeling results - Structure                                                                                           | S5  |
| Supporting Information Figure S8: Modeling results - H-bonds                                                                                             | S6  |
| Supporting Information Figure S9: Modeling results - H-bond distances                                                                                    | S6  |
| Computational Protocol and Model Validation                                                                                                              | S7  |
| References                                                                                                                                               | S10 |
| Appendix A: PDB data                                                                                                                                     | S11 |

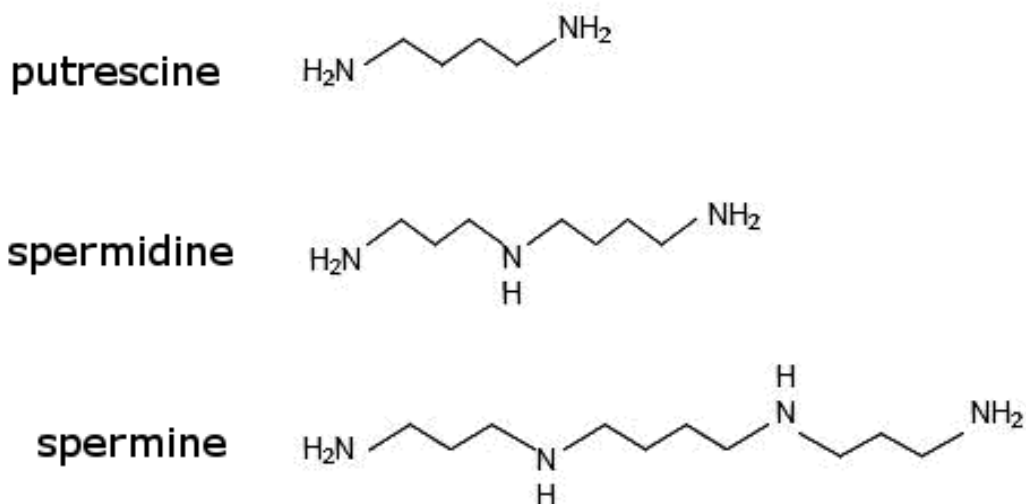

**Supporting Information Figure S1.** The polycationic alkylamines spermine and spermidine, together with their diamine precursor putrescine.

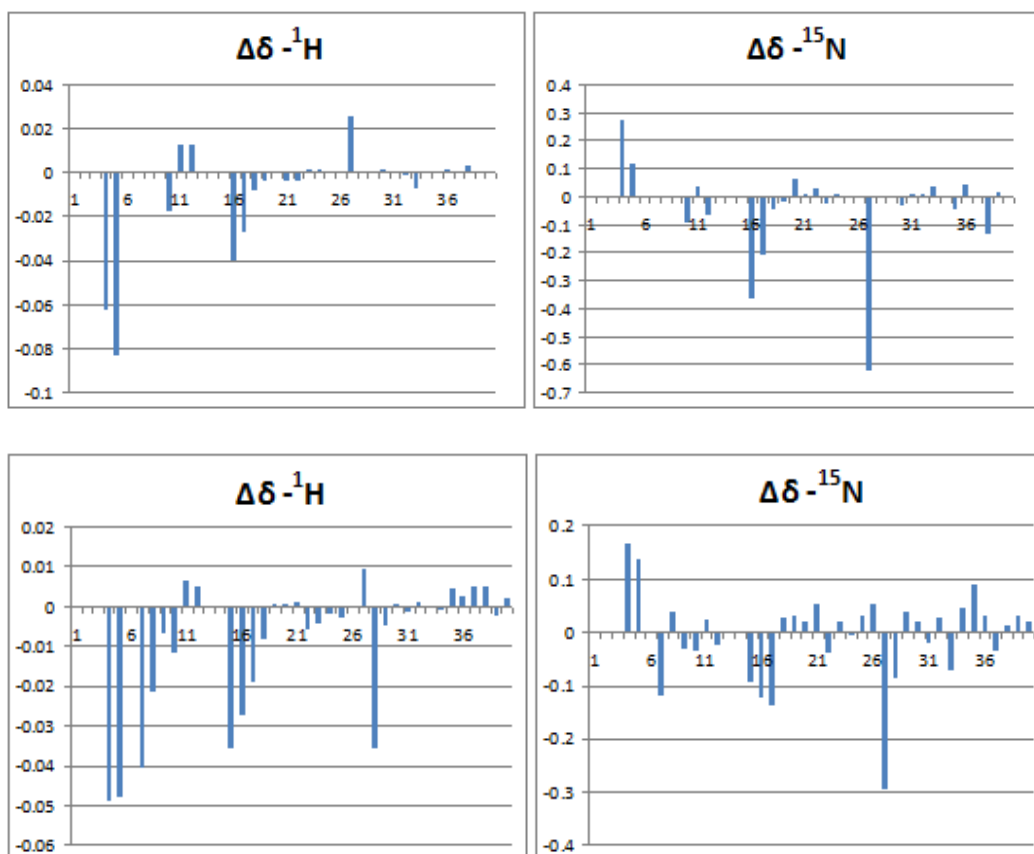

**Supporting Information Figure S2.** Chemical shift differences in the  $^1\text{H}$ - $^{15}\text{N}$ -HSQC spectra of 100  $\mu\text{M}$   $^{15}\text{N}$ -labeled A $\beta$ (1-40) peptide in 20 mM sodium phosphate buffer at pH 7.3, +5  $^\circ\text{C}$ , after addition of 200  $\mu\text{M}$  of spermine (top) or putrescine (bottom).

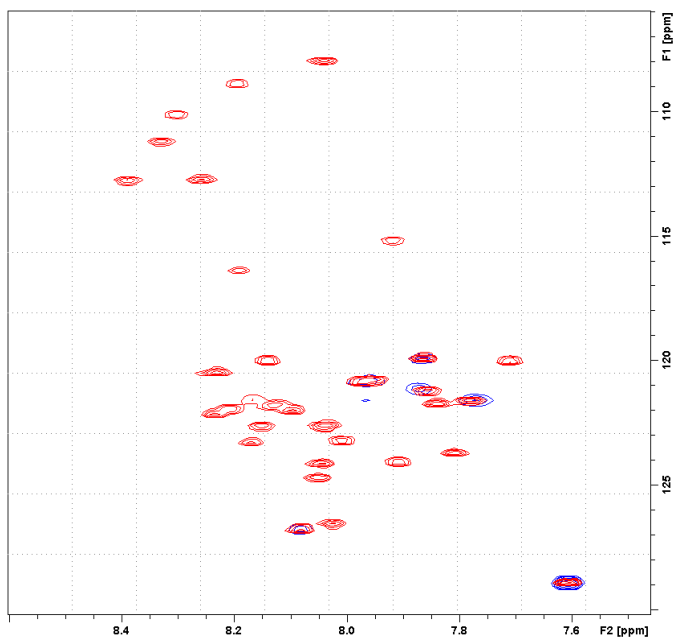

**Supporting Figure S3.** NMR  $^1\text{H}$ - $^{15}\text{N}$ -HSQC spectra of 100  $\mu\text{M}$   $^{15}\text{N}$ -labeled A $\beta$  (1-40) peptide in 20 mM sodium phosphate buffer at pH 7.3, +5  $^\circ\text{C}$ , before (red) and after (blue) addition of 300  $\mu\text{M}$  spermine. Note the unchanged intensity of the V40 cross-peak in the lower right corner.

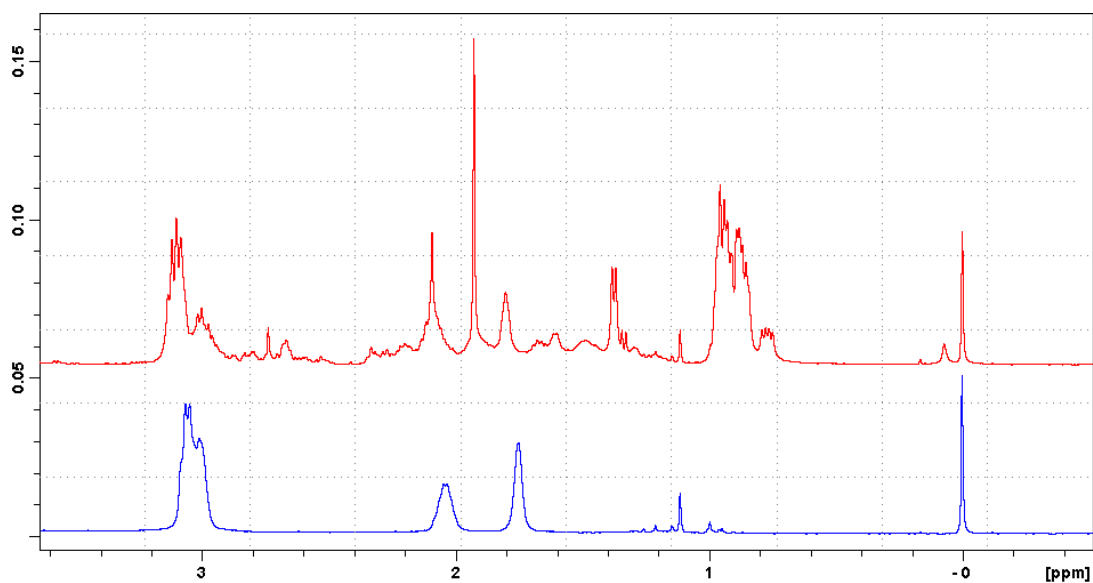

**Supporting Information Figure S4.** NMR spectra at +5  $^\circ\text{C}$  of 150  $\mu\text{M}$  spermine in 10 mM phosphate buffer pH 7.3 (blue, lower), and after addition of 90  $\mu\text{M}$  (red, upper) A $\beta$ (1-40) peptide. Note the chemical shift changes of the spermine signals around 2 ppm. The pH was measured both before and after each measurement, and the spectra were referenced to added TSP (0 ppm).

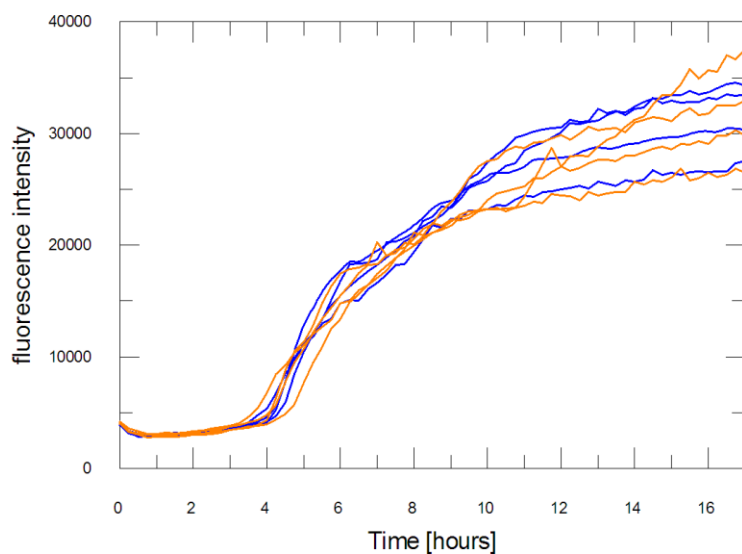

**Supporting Information Figure S5.** ThT fluorescence curves of 20  $\mu\text{M}$   $\text{A}\beta(1-40)$  peptide in 50 mM Tris buffer, pH 7.4, with 500  $\mu\text{M}$  putrescine (blue lines), and with additional 1 mM EDTA present (orange lines).

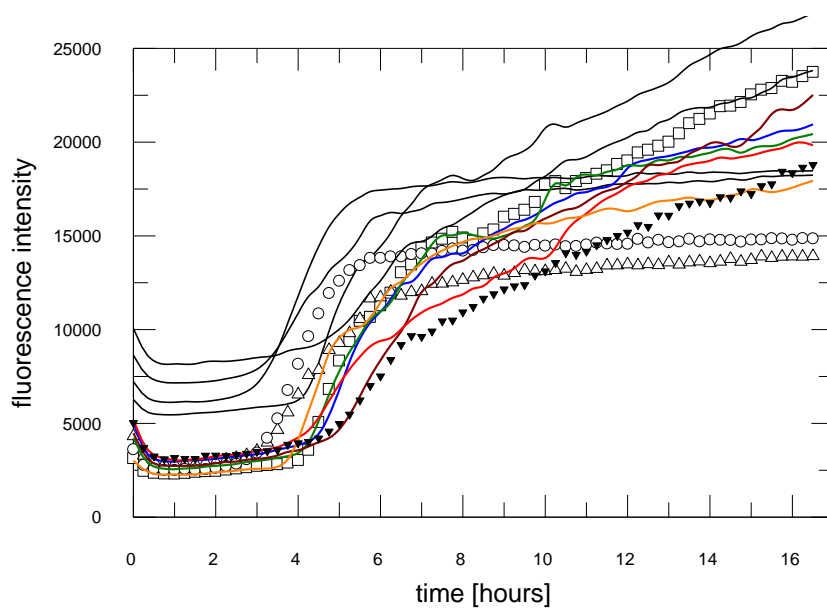

**Supporting Information Figure S6.** ThT fluorescence curves at +37  $^{\circ}\text{C}$  for  $\text{A}\beta(1-40)$  aggregation in only 50 mM Tris buffer, pH 7.4 ( $\blacktriangledown$ ), or in presence also of: 0.5 mM putrescine ( $\square$ ); 0.5 mM spermidine ( $\Delta$ ); 0.5 mM spermine ( $\circ$ ); 0.1 mM NaCl (— blue); 0.4 mM NaCl (— green); 2 mM NaCl (— brown); 10 mM NaCl (— red); 100 mM NaCl (— orange).

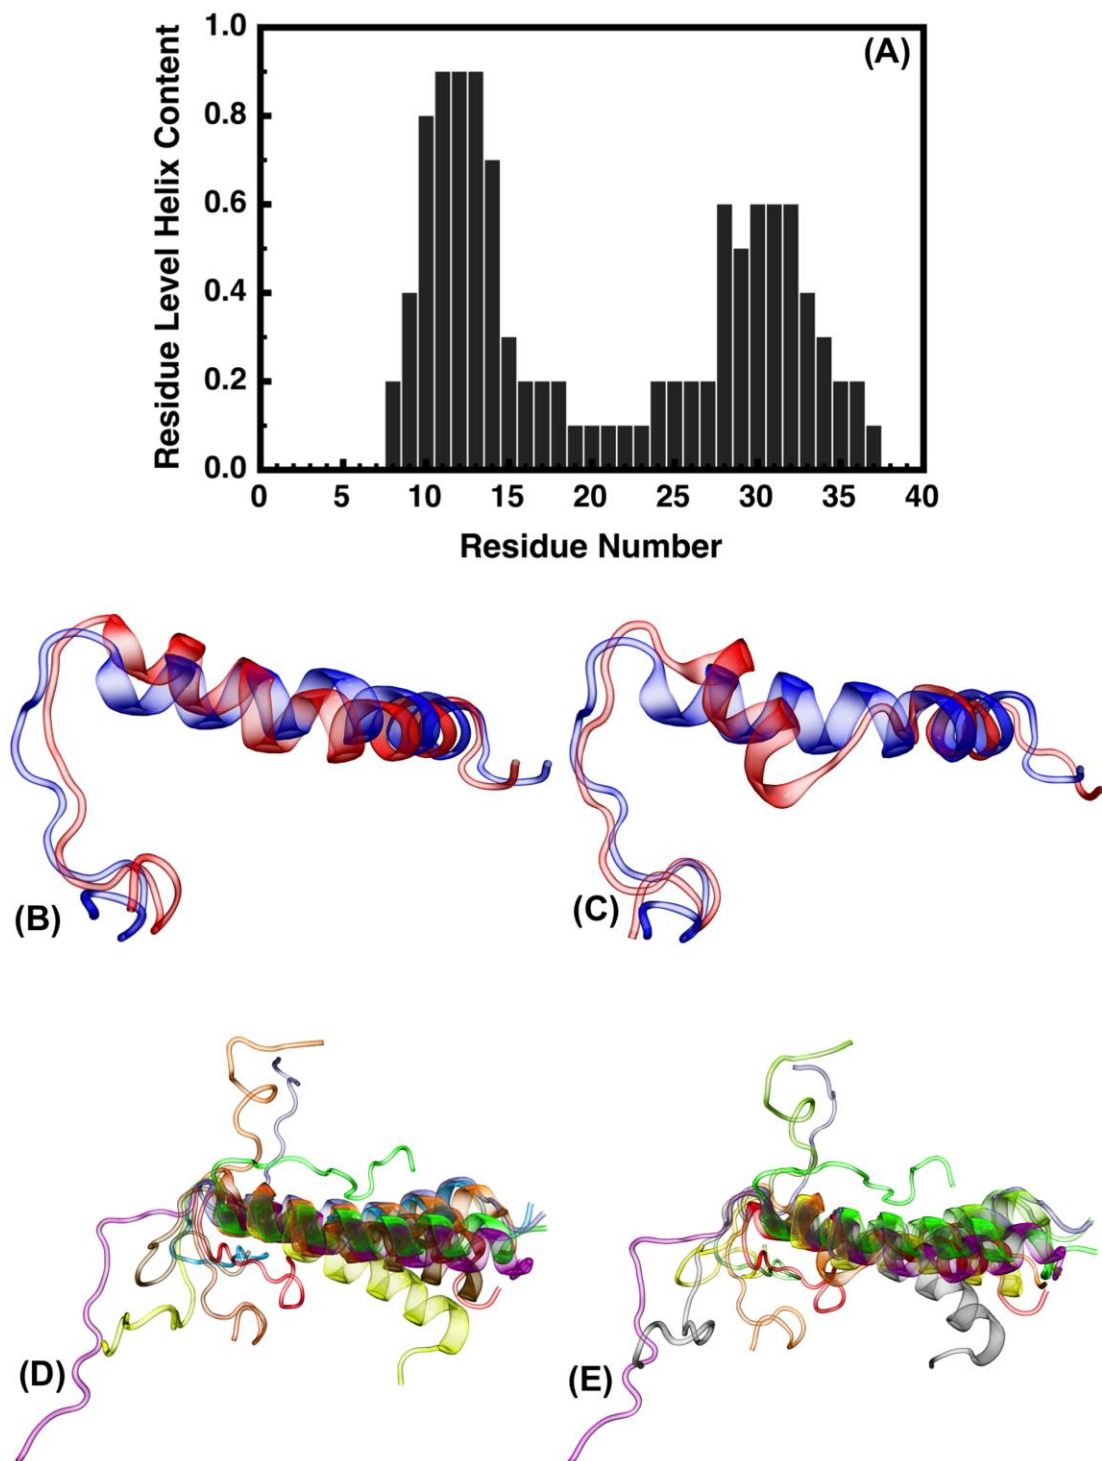

**Supporting Information Figure S7.** (A): Helical content for each residue in Aβ(1-40), predicted from the amino acid sequence using the AGADIR algorithm (Muñoz & Serrano, 1997). (B) and (C): Overlays of the initial (blue) and final (red) conformations of a sample isoform of Aβ(1-40), before and after 10ns of MD simulation, in the presence of only neutralizing counterions (B), or 200 mM of NaCl (C). (D) and (E): overlays of 9 different isoforms of Aβ(1-40), after 10ns of MD simulation, again with either only neutralizing counterions (D) or in the presence of 200 mM NaCl (E).

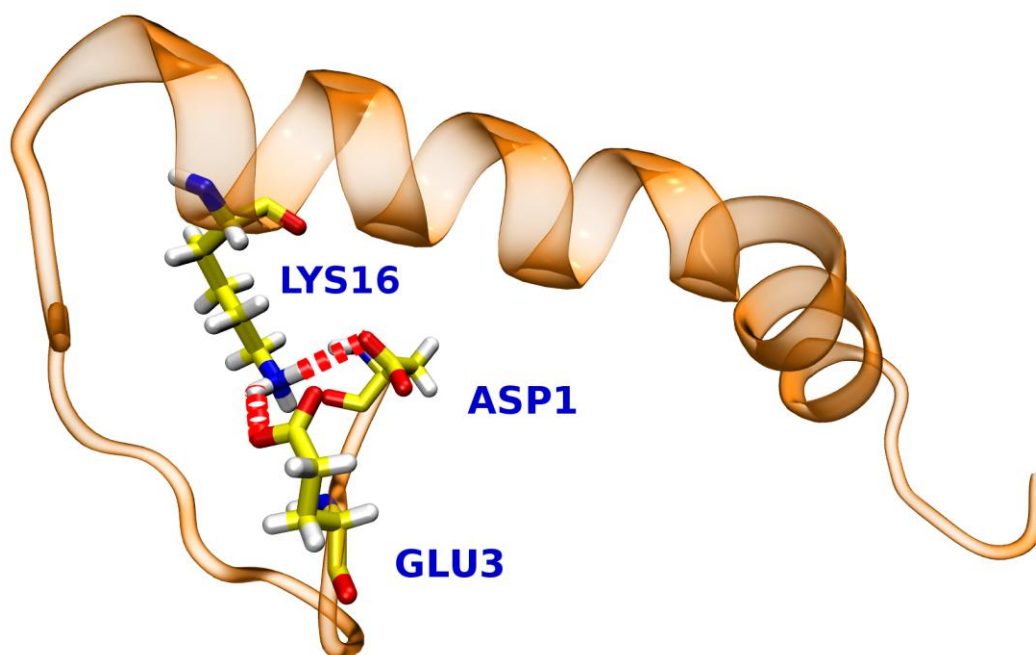

**Supporting Information Figure S8.** Observed hydrogen bonds between Lys16 and respectively Asp1 and Glu3 after 10ns of MD simulation of the A $\beta$ (1-40) peptide, in the presence of neutralizing counterions only (i.e. no polyamines present).

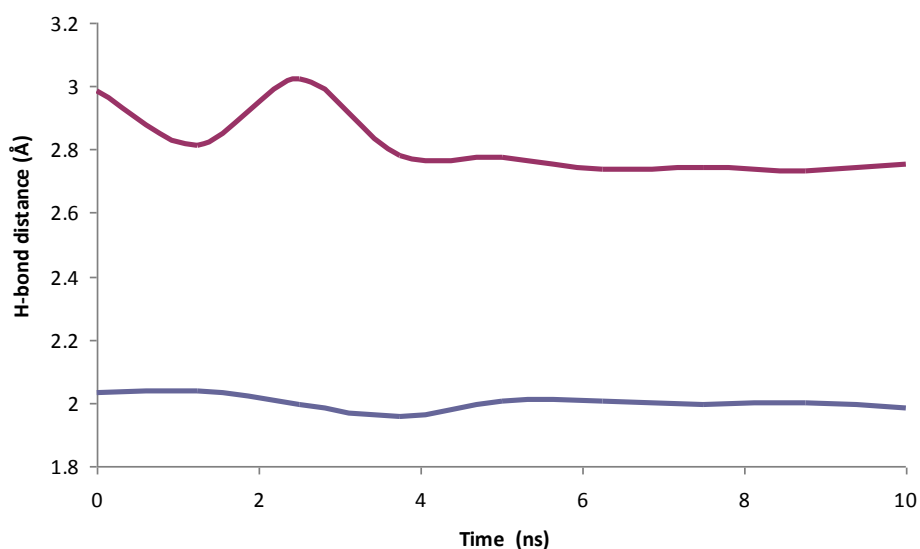

**Supporting Information Figure S9.** H-bond distances between Lys16-Asp1 (blue line) and Lys16-Glu3 (purple line) during 10ns MD simulation of the A $\beta$ (1-40) peptide, in the presence of neutralizing counterions only (i.e. no polyamines present).

## Computational Protocol and Model Validation

The initial atomic coordinates of the uncomplexed form A $\beta$ (1-40) (Coles et al, 1998) as well as the complexes of A $\beta$ (1-40) with putrescine, spermine and spermidine were obtained as outlined in the main text. Partial charges for each ligand were obtained using Gaussian09 (Frisch *et al*, 2009), at the B3LYP/6-31G\* level of theory (Becke, 1993), using CHELPG charges (Breneman & Wiberg, 1990) and in conjunction with the COSMO continuum model (Klamt & Schüürmann, 1993). All ligands were kept in their fully protonated states, as would be expected from amines at physiological pH, leading to total charges of +2, +3 and +4 on putrescine, spermidine and spermidine respectively (Supplementary Figure S1). Best-fit conformations of the peptide in complex with the relevant polyamines were obtained using the HEX docking package (Ritchie, 2003), selecting the three most physically reasonable conformations (based on peptide-ligand interactions) from the 15 top-ranked structures in the resulting docking ensemble. In both the native, unliganded form of the peptide, as well as in the peptide-ligand complexes, all ionizable residues were set to their default ionization states at physiological pH (with the exception of histidines, which were kept neutral), and the total system was neutralized by Na<sup>+</sup> or Cl<sup>-</sup> ions as relevant, using 3 Na<sup>+</sup> ions for the uncomplexed form of the peptide, and one Na<sup>+</sup>, no counterions, and one Cl<sup>-</sup> for the peptide complexed with putrescine, spermidine and spermine respectively. For comparison, we also performed simulations on the uncomplexed form of the peptide in the presence of 200 mM NaCl. Ions were added using AmberTools 12 (Case *et al*, 2012), *via* the CHIMERA software package (Pettersen *et al*, 2004).

The entire peptide (or peptide-ligand complex) was solvated using a water sphere of 34Å radius (in order to engulf the entire peptide and capture its flexibility explicitly during the simulation), which was surrounded by first a 2Å grid of Langevin dipoles, and then by bulk solvent, modeled using the surface-constrained all-atom solvent model (SCAAS) (Lee et al, 1993). Each system was equilibrated by gradual heating from 30 to 300K, in 125ps (using temperatures of 30, 50, 80, 100, 150, 200, 250 and 300K), followed by a subsequent 10ns of molecular dynamics (MD) at 300K, monitoring structural and energetic changes along the trajectory. A 1fs timestep was used throughout. Here, it is important to make a note about the size of the peptide: as mentioned above, the ten isoform fits to the NMR data vary in how elongated the peptide is, and, at maximum elongation (i.e. in almost linear form), A $\beta$ (1-40) is approximately 60Å in length, requiring a very large simulation sphere to contain the entire peptide, making it computationally prohibitive to simulate (see also the discussion in the supporting information of (Lin et al, 2012) for the related case of A $\beta$ (1-42). Therefore, we limited our simulations to 9 out of the 10 proposed models, selecting only those structures we could fully accommodate in a water sphere of reasonable size. All 9 isoforms were subjected

to 10ns of MD simulation as outlined above, in order to compare structural diversity after relaxation, and HEX docking was performed on four representative confirmations, to obtain the best three positions, and these were in turn also subjected to 10ns of MD simulation (resulting in 9 simulations of the uncomplexed form of the peptide, and 4x3 simulations of the complexed form of the peptide). All simulations were performed using the MOLARIS simulation package and the ENZY MIX forcefield (Lee et al, 1993), with long-range effects being treated using the local reaction field (LRF) approach (Lee & Warshel, 1992).

As outlined in the main text, the presence of the polyamines appears to trigger structural transitions in the A $\beta$ (1-40) peptides on timescales spanning several hours. Clearly such timescales are beyond the scope of computer simulations, however, our aim in this work has been to perform a preliminary theoretical investigation of the interaction of individual polyamines with the peptide in order to examine how initial contacts may be established between the two, as well as the extent to which secondary structural features are retained or changed on the ns timescale. As our starting point, we used a structure of the A $\beta$ (1-40) peptide solved in the presence of sodium dodecyl sulfate (SDS) micelles, which kept the central residues (15-36) of the peptide in an alpha-helical conformation (Coles et al, 1998). Clearly, objections can be raised against extending this structure to an aqueous solution, where the peptide is believed to adopt a conformation dominated by random coil structure. However, the inherent disorder tendency of the peptide makes it almost impossible to solve a structure in aqueous solution, and, therefore, this model provides one of the best currently available starting points for theoretical exploration of the A $\beta$ (1-40) monomer.

In order to validate our model, we first started by testing the stability of the SDS structure in aqueous solution in the absence of polyamines. Supplementary Figure S7 (A) shows a plot of the predicted helical content of each residue, obtained from the amino acid sequence via the AGADIR algorithm (Muñoz & Serrano, 1997). Supplementary Figure S7 (B) and (C) shows an overlay of the initial and final structures of a sample isoform of A $\beta$ (1-40), before and after 10ns of MD simulation, either in the presence of only neutralizing counterions (B) or in the presence of 200 mM NaCl. The RMSD of the final structure from the initial structure is 0.4 Å and 2.1 Å with and without counterions respectively. Supplementary Figure S7 (D) and (E) shows an overlay of 9 different isoforms of A $\beta$ (1-40) after 10ns of MD simulation, again, with only neutralizing counterions and in the presence of 200 mM NaCl.

It should be noted that AGADIR predicts helical content by evaluating the energy of short-range inter-residue interactions estimated from the local amino acid composition, and does *not* take any information about secondary structure into account when making the prediction. Therefore, it is interesting to see that AGADIR predicts the peptide to display two



alpha helical regions, with a kink in approximately the same location as predicted by the NMR structure (Coles et al, 1998), and with a disordered N-terminus - particularly the first 6-7 residues. This ties in nicely with the SDS model, which resulted in 10 isomers, all of which present a more ordered alpha-helical configuration between residues 15-36, a hinge or kink at residues 25-27, and greater disorder in both termini (although the precise extent of this disorder appears to be pH-dependent). From our simulations on the uncomplexed ligand, in the presence of only neutralizing counterions, it would appear that the central helix is quite stable over the course of 10ns of simulation time even in the absence of SDS micelles (see Supplementary Figure S7 (D)), while in the presence of 200 mM of NaCl (Supplementary Figure S7 (C)) it can be seen that the stability of this helical structure is dependent on the ionic strength used. That is, when comparing 9 different isoforms of the peptide which were taken as starting structures, the final structures do not deviate from each other by more than an RMSD of 0.4 Å (using the final structure shown in Supplementary Figure S7 (B) as a reference point). This suggests that the helical conformation is a valid starting point for examining interactions between the polyamines and the monomeric form of the peptide. Additionally, a tendency towards a helical conformation was recently demonstrated by Pande and coworkers (Lin et al, 2012), who studied the effect of peptide length and pathogenic mutations on structural ensembles of A $\beta$ (1-40) and A $\beta$ (1-42), observing that reducing the peptide length to 40 residues also reduces the tendency towards hairpin formation (note however that the authors used both a very small simulation box of 5x5x5nm, and also did not explore the effect of changing ionic strength on structural stability, which could potentially change their observations, see also Supplementary Figure S7 (C)).

At present, we are only examining initial interactions between the polyamines and the peptide over the course of short simulations, and in the presence of only neutralizing counterions. However, for subsequent work, we plan to explore structural changes upon much longer simulation time, as well as the effects of varying ionic strength.

## References

- Becke AD (1993) Density functional thermochemistry. III. The role of exact exchange *Journal of Chemical Physics* **98**(7): 5648-5652
- Breneman CM, Wiberg KB (1990) Determining atom-centered monopoles from molecular electrostatic potentials. The need for high sampling density in formamide conformational analysis. *Journal of Computational Chemistry* **11**(3): 361-373
- Case *et al.* (2012) AMBER 12, University of California, San Francisco, USA
- Coles M, Bicknell W, Watson AA, Fairlie DP, Craik DJ (1998) Solution structure of amyloid beta-peptide(1-40) in a water-micelle environment. Is the membrane-spanning domain where we think it is? *Biochemistry* **37**(31): 11064-11077
- Frisch *et al.* (2009) Gaussian 09 Revision A.1, Gaussian, Inc., Wallingford CT, USA
- Klamt A, Schüürmann G (1993) COSMO: a new approach to dielectric screening in solvents with explicit expressions for the screening energy and its gradient. *J Chem Soc, Perkin Trans 2*: 799-805
- Lee FS, Chu ZT, Warshel A (1993) Microscopic and semimicroscopic calculations of electrostatic energies in proteins by the POLARIS and ENZYMIK programs. *Journal of Computational Chemistry* **14**(2): 161-185
- Lee FS, Warshel A (1992) A local reaction field method for fast evaluation of long-range electrostatic interactions in molecular simulations *Journal of Chemical Physics* **97**(5): 3100-3107
- Lin Y-S, Bowman GR, Beauchamp KA, Pande VS (2012) Investigating How Peptide Length and a Pathogenic Mutation Modify the Structural Ensemble of Amyloid Beta Monomer. *Biophysical Journal* **102**: 315-324
- Muñoz V, Serrano L (1997) Development of the multiple sequence approximation within the AGADIR model of alpha-helix formation: comparison with Zimm-Bragg and Lifson-Roig formalisms. *Biopolymers* **41**(5): 495-509
- Pettersen EF, Goddard TD, Huang CC, Couch GS, Greenblatt DM, Meng EC, Ferrin TE (2004) UCSF Chimera--a visualization system for exploratory research and analysis. *J Comput Chem* **25**(13): 1605-1612
- Ritchie DW (2003) Evaluation of protein docking predictions using Hex 3.1 in CAPRI rounds 1 and 2. *Proteins* **52**(1): 98-106

## Appendix A. PDB files

Herein we provide PDB files with atomic coordinates obtained with the MOLARIS simulation package (Lee et al, 1993) for two uncomplexed forms (second and tenth) out of ten NMR isoforms of A $\beta$ (1-40) (Coles et al, 1998) with 3 Na<sup>+</sup> counterions. All ionizable residues were set to their default ionization states at physiological pH (with the exception of histidines, which were kept neutral), and the total system was neutralized using 3 Na<sup>+</sup> ions for the uncomplexed form of the peptide. Ions were added using AmberTools 12 (Case *et al*, 2012), *via* the CHIMERA software package (Pettersen *et al*, 2004). Both isoforms (second and tenth) were subjected to 10ns of MD simulation as outlined in the main text, in order to compare structural diversity after relaxation. We therefore provide both the initial structures at the beginning of the MD simulation, and the final structures obtained after the MD simulation.

### Initial MD structure of the second NMR isoform with 3 Na<sup>+</sup> counterions

|      |    |     |     |   |        |       |         |
|------|----|-----|-----|---|--------|-------|---------|
| ATOM | 1  | N   | ASP | 1 | 17.549 | 4.484 | -15.398 |
| ATOM | 2  | HN  | ASP | 1 | 17.941 | 5.105 | -14.722 |
| ATOM | 3  | CA  | ASP | 1 | 16.101 | 4.570 | -15.733 |
| ATOM | 4  | HA  | ASP | 1 | 15.959 | 4.259 | -16.673 |
| ATOM | 5  | CB  | ASP | 1 | 15.282 | 3.669 | -14.773 |
| ATOM | 6  | HB1 | ASP | 1 | 15.528 | 3.943 | -13.842 |
| ATOM | 7  | HB2 | ASP | 1 | 15.437 | 2.724 | -15.064 |
| ATOM | 8  | CG  | ASP | 1 | 13.775 | 3.941 | -14.930 |
| ATOM | 9  | OD1 | ASP | 1 | 13.242 | 3.478 | -15.926 |
| ATOM | 10 | OD2 | ASP | 1 | 13.235 | 4.595 | -14.050 |
| ATOM | 11 | C   | ASP | 1 | 15.628 | 6.023 | -15.600 |
| ATOM | 12 | O   | ASP | 1 | 15.873 | 6.665 | -14.596 |
| ATOM | 13 | N   | ALA | 2 | 14.959 | 6.489 | -16.627 |
| ATOM | 14 | HN  | ALA | 2 | 14.798 | 5.895 | -17.411 |
| ATOM | 15 | CA  | ALA | 2 | 14.433 | 7.886 | -16.644 |
| ATOM | 16 | HA  | ALA | 2 | 14.947 | 8.496 | -16.040 |
| ATOM | 17 | CB  | ALA | 2 | 14.552 | 8.418 | -18.080 |
| ATOM | 18 | HB1 | ALA | 2 | 14.613 | 9.416 | -18.054 |
| ATOM | 19 | HB2 | ALA | 2 | 15.375 | 8.037 | -18.501 |
| ATOM | 20 | HB3 | ALA | 2 | 13.743 | 8.140 | -18.598 |
| ATOM | 21 | C   | ALA | 2 | 12.974 | 7.840 | -16.168 |
| ATOM | 22 | O   | ALA | 2 | 12.047 | 8.207 | -16.867 |
| ATOM | 23 | N   | GLU | 3 | 12.844 | 7.370 | -14.953 |
| ATOM | 24 | HN  | GLU | 3 | 13.668 | 7.093 | -14.459 |
| ATOM | 25 | CA  | GLU | 3 | 11.521 | 7.227 | -14.273 |
| ATOM | 26 | HA  | GLU | 3 | 11.645 | 6.708 | -13.425 |
| ATOM | 27 | CB  | GLU | 3 | 10.981 | 8.654 | -13.955 |
| ATOM | 28 | HB1 | GLU | 3 | 10.016 | 8.555 | -13.711 |

|      |    |         |     |   |        |        |         |
|------|----|---------|-----|---|--------|--------|---------|
| ATOM | 29 | HB2     | GLU | 3 | 11.234 | 9.240  | -14.726 |
| ATOM | 30 | CG      | GLU | 3 | 11.704 | 9.208  | -12.709 |
| ATOM | 31 | HG1     | GLU | 3 | 11.406 | 10.157 | -12.597 |
| ATOM | 32 | HG2     | GLU | 3 | 12.678 | 9.010  | -12.827 |
| ATOM | 33 | CD      | GLU | 3 | 11.239 | 8.443  | -11.455 |
| ATOM | 34 | OE1     | GLU | 3 | 10.179 | 8.798  | -10.963 |
| ATOM | 35 | OE2     | GLU | 3 | 11.960 | 7.542  | -11.056 |
| ATOM | 36 | C       | GLU | 3 | 10.513 | 6.427  | -15.112 |
| ATOM | 37 | O       | GLU | 3 | 9.330  | 6.716  | -15.146 |
| ATOM | 38 | N       | PHE | 4 | 11.036 | 5.426  | -15.775 |
| ATOM | 39 | HN      | PHE | 4 | 12.019 | 5.253  | -15.695 |
| ATOM | 40 | CA      | PHE | 4 | 10.207 | 4.535  | -16.641 |
| ATOM | 41 | HA      | PHE | 4 | 9.270  | 4.880  | -16.693 |
| ATOM | 42 | CB      | PHE | 4 | 10.827 | 4.517  | -18.058 |
| ATOM | 43 | HCB1PHE |     | 4 | 10.249 | 3.921  | -18.616 |
| ATOM | 44 | HCB2PHE |     | 4 | 11.796 | 4.294  | -17.943 |
| ATOM | 45 | CG      | PHE | 4 | 10.768 | 5.916  | -18.698 |
| ATOM | 46 | CD1     | PHE | 4 | 9.630  | 6.706  | -18.612 |
| ATOM | 47 | HCD1PHE |     | 4 | 8.827  | 6.366  | -18.125 |
| ATOM | 48 | CE1     | PHE | 4 | 9.597  | 7.957  | -19.193 |
| ATOM | 49 | HCE1PHE |     | 4 | 8.773  | 8.517  | -19.125 |
| ATOM | 50 | CZ      | PHE | 4 | 10.702 | 8.435  | -19.868 |
| ATOM | 51 | HCZ     | PHE | 4 | 10.679 | 9.341  | -20.288 |
| ATOM | 52 | CE2     | PHE | 4 | 11.838 | 7.658  | -19.959 |
| ATOM | 53 | HCE2PHE |     | 4 | 12.639 | 8.003  | -20.446 |
| ATOM | 54 | CD2     | PHE | 4 | 11.871 | 6.406  | -19.377 |
| ATOM | 55 | HCD2PHE |     | 4 | 12.697 | 5.850  | -19.446 |
| ATOM | 56 | C       | PHE | 4 | 10.149 | 3.123  | -16.048 |
| ATOM | 57 | O       | PHE | 4 | 9.958  | 2.150  | -16.754 |
| ATOM | 58 | N       | ARG | 5 | 10.320 | 3.067  | -14.751 |
| ATOM | 59 | HN      | ARG | 5 | 10.476 | 3.916  | -14.244 |
| ATOM | 60 | CA      | ARG | 5 | 10.290 | 1.769  | -14.008 |
| ATOM | 61 | HA      | ARG | 5 | 10.206 | 0.981  | -14.617 |
| ATOM | 62 | CB      | ARG | 5 | 11.623 | 1.617  | -13.219 |
| ATOM | 63 | HB1     | ARG | 5 | 11.420 | 1.841  | -12.266 |
| ATOM | 64 | HB2     | ARG | 5 | 12.310 | 2.152  | -13.714 |
| ATOM | 65 | CG      | ARG | 5 | 12.112 | 0.149  | -13.236 |
| ATOM | 66 | HG1     | ARG | 5 | 13.046 | 0.153  | -12.879 |
| ATOM | 67 | HG2     | ARG | 5 | 11.941 | -0.199 | -14.159 |
| ATOM | 68 | CD      | ARG | 5 | 11.271 | -0.717 | -12.270 |
| ATOM | 69 | HD1     | ARG | 5 | 10.321 | -0.666 | -12.582 |
| ATOM | 70 | HD2     | ARG | 5 | 11.498 | -0.423 | -11.341 |
| ATOM | 71 | NE      | ARG | 5 | 11.698 | -2.144 | -12.397 |
| ATOM | 72 | HE      | ARG | 5 | 11.133 | -2.772 | -12.929 |
| ATOM | 73 | CZ      | ARG | 5 | 12.792 | -2.598 | -11.832 |
| ATOM | 74 | NH1     | ARG | 5 | 13.556 | -1.807 | -11.126 |
| ATOM | 75 | HH11ARG |     | 5 | 14.388 | -2.151 | -10.696 |
| ATOM | 76 | HH12ARG |     | 5 | 13.325 | -0.844 | -11.002 |
| ATOM | 77 | NH2     | ARG | 5 | 13.094 | -3.858 | -11.994 |
| ATOM | 78 | HH21ARG |     | 5 | 13.925 | -4.204 | -11.564 |
| ATOM | 79 | HH22ARG |     | 5 | 12.510 | -4.462 | -12.532 |
| ATOM | 80 | C       | ARG | 5 | 9.078  | 1.828  | -13.070 |
| ATOM | 81 | O       | ARG | 5 | 9.167  | 1.494  | -11.902 |
| ATOM | 82 | N       | HIS | 6 | 7.975  | 2.265  | -13.643 |
| ATOM | 83 | HN      | HIS | 6 | 8.020  | 2.510  | -14.610 |
| ATOM | 84 | CA      | HIS | 6 | 6.655  | 2.416  | -12.935 |
| ATOM | 85 | HA      | HIS | 6 | 6.126  | 3.113  | -13.420 |

|      |     |      |     |    |        |        |         |
|------|-----|------|-----|----|--------|--------|---------|
| ATOM | 86  | CB   | HIS | 6  | 5.925  | 1.036  | -12.962 |
| ATOM | 87  | HB1  | HIS | 6  | 5.834  | 0.781  | -13.925 |
| ATOM | 88  | HB2  | HIS | 6  | 5.103  | 1.138  | -12.400 |
| ATOM | 89  | CG   | HIS | 6  | 6.773  | -0.054 | -12.300 |
| ATOM | 90  | ND1  | HIS | 6  | 7.098  | -0.089 | -11.050 |
| ATOM | 91  | HD1  | HIS | 6  | 6.833  | 0.589  | -10.369 |
| ATOM | 92  | CE1  | HIS | 6  | 7.823  | -1.138 | -10.816 |
| ATOM | 93  | HE1  | HIS | 6  | 8.191  | -1.375 | -9.918  |
| ATOM | 94  | NE2  | HIS | 6  | 8.014  | -1.847 | -11.900 |
| ATOM | 95  | CD2  | HIS | 6  | 7.366  | -1.186 | -12.839 |
| ATOM | 96  | HD2  | HIS | 6  | 7.310  | -1.459 | -13.798 |
| ATOM | 97  | C    | HIS | 6  | 6.782  | 2.930  | -11.488 |
| ATOM | 98  | O    | HIS | 6  | 5.962  | 2.639  | -10.636 |
| ATOM | 99  | N    | ASP | 7  | 7.828  | 3.693  | -11.286 |
| ATOM | 100 | HN   | ASP | 7  | 8.434  | 3.875  | -12.060 |
| ATOM | 101 | CA   | ASP | 7  | 8.168  | 4.308  | -9.963  |
| ATOM | 102 | HA   | ASP | 7  | 8.521  | 3.583  | -9.371  |
| ATOM | 103 | CB   | ASP | 7  | 9.259  | 5.421  | -10.175 |
| ATOM | 104 | HB1  | ASP | 7  | 10.077 | 5.112  | -9.688  |
| ATOM | 105 | HB2  | ASP | 7  | 8.832  | 6.289  | -9.918  |
| ATOM | 106 | CG   | ASP | 7  | 9.663  | 5.558  | -11.658 |
| ATOM | 107 | OD1  | ASP | 7  | 10.541 | 4.811  | -12.069 |
| ATOM | 108 | OD2  | ASP | 7  | 9.062  | 6.400  | -12.305 |
| ATOM | 109 | C    | ASP | 7  | 6.940  | 4.904  | -9.254  |
| ATOM | 110 | O    | ASP | 7  | 6.309  | 5.823  | -9.739  |
| ATOM | 111 | N    | SER | 8  | 6.662  | 4.325  | -8.110  |
| ATOM | 112 | HN   | SER | 8  | 7.249  | 3.579  | -7.805  |
| ATOM | 113 | CA   | SER | 8  | 5.520  | 4.721  | -7.238  |
| ATOM | 114 | HA   | SER | 8  | 5.412  | 5.715  | -7.252  |
| ATOM | 115 | CB   | SER | 8  | 4.223  | 4.064  | -7.752  |
| ATOM | 116 | HB1  | SER | 8  | 3.509  | 4.211  | -7.066  |
| ATOM | 117 | HB2  | SER | 8  | 4.443  | 3.132  | -8.041  |
| ATOM | 118 | OG   | SER | 8  | 3.874  | 4.810  | -8.908  |
| ATOM | 119 | HG   | SER | 8  | 4.586  | 5.294  | -9.422  |
| ATOM | 120 | C    | SER | 8  | 5.799  | 4.244  | -5.803  |
| ATOM | 121 | O    | SER | 8  | 6.689  | 3.448  | -5.564  |
| ATOM | 122 | N    | GLY | 9  | 5.012  | 4.754  | -4.888  |
| ATOM | 123 | HN   | GLY | 9  | 4.302  | 5.398  | -5.163  |
| ATOM | 124 | CA   | GLY | 9  | 5.153  | 4.396  | -3.445  |
| ATOM | 125 | HA1  | GLY | 9  | 6.129  | 4.420  | -3.228  |
| ATOM | 126 | HA2  | GLY | 9  | 4.637  | 3.551  | -3.298  |
| ATOM | 127 | C    | GLY | 9  | 4.479  | 5.484  | -2.614  |
| ATOM | 128 | O    | GLY | 9  | 5.138  | 6.241  | -1.926  |
| ATOM | 129 | N    | TYR | 10 | 3.172  | 5.528  | -2.709  |
| ATOM | 130 | HN   | TYR | 10 | 2.700  | 4.872  | -3.294  |
| ATOM | 131 | CA   | TYR | 10 | 2.374  | 6.544  | -1.954  |
| ATOM | 132 | HA   | TYR | 10 | 2.742  | 6.621  | -1.026  |
| ATOM | 133 | CB   | TYR | 10 | 2.477  | 7.908  | -2.685  |
| ATOM | 134 | HCB1 | TYR | 10 | 3.449  | 8.144  | -2.724  |
| ATOM | 135 | HCB2 | TYR | 10 | 1.839  | 8.531  | -2.231  |
| ATOM | 136 | CG   | TYR | 10 | 1.996  | 7.751  | -4.137  |
| ATOM | 137 | CD1  | TYR | 10 | 2.880  | 7.392  | -5.139  |
| ATOM | 138 | HCD1 | TYR | 10 | 3.842  | 7.238  | -4.918  |
| ATOM | 139 | CE1  | TYR | 10 | 2.445  | 7.244  | -6.439  |
| ATOM | 140 | HCE1 | TYR | 10 | 3.093  | 6.983  | -7.153  |
| ATOM | 141 | CZ   | TYR | 10 | 1.118  | 7.453  | -6.762  |
| ATOM | 142 | OH   | TYR | 10 | 0.685  | 7.302  | -8.058  |

|      |     |      |     |    |        |        |        |
|------|-----|------|-----|----|--------|--------|--------|
| ATOM | 143 | HOH  | TYR | 10 | 0.253  | 8.072  | -8.533 |
| ATOM | 144 | CE2  | TYR | 10 | 0.234  | 7.812  | -5.763 |
| ATOM | 145 | HCE2 | TYR | 10 | -0.728 | 7.965  | -5.985 |
| ATOM | 146 | CD2  | TYR | 10 | 0.668  | 7.961  | -4.461 |
| ATOM | 147 | HCD2 | TYR | 10 | 0.019  | 8.223  | -3.748 |
| ATOM | 148 | C    | TYR | 10 | 0.900  | 6.123  | -1.845 |
| ATOM | 149 | O    | TYR | 10 | 0.468  | 5.174  | -2.472 |
| ATOM | 150 | N    | GLU | 11 | 0.178  | 6.866  | -1.041 |
| ATOM | 151 | HN   | GLU | 11 | 0.609  | 7.630  | -0.567 |
| ATOM | 152 | CA   | GLU | 11 | -1.272 | 6.597  | -0.822 |
| ATOM | 153 | HA   | GLU | 11 | -1.460 | 5.615  | -0.866 |
| ATOM | 154 | CB   | GLU | 11 | -1.667 | 7.127  | 0.574  |
| ATOM | 155 | HB1  | GLU | 11 | -1.493 | 8.112  | 0.566  |
| ATOM | 156 | HB2  | GLU | 11 | -1.194 | 6.549  | 1.241  |
| ATOM | 157 | CG   | GLU | 11 | -3.191 | 6.948  | 0.831  |
| ATOM | 158 | HG1  | GLU | 11 | -3.303 | 6.807  | 1.816  |
| ATOM | 159 | HG2  | GLU | 11 | -3.510 | 6.246  | 0.194  |
| ATOM | 160 | CD   | GLU | 11 | -3.947 | 8.245  | 0.482  |
| ATOM | 161 | OE1  | GLU | 11 | -3.833 | 9.170  | 1.270  |
| ATOM | 162 | OE2  | GLU | 11 | -4.600 | 8.248  | -0.551 |
| ATOM | 163 | C    | GLU | 11 | -2.085 | 7.301  | -1.914 |
| ATOM | 164 | O    | GLU | 11 | -2.029 | 8.510  | -2.043 |
| ATOM | 165 | N    | VAL | 12 | -2.817 | 6.520  | -2.668 |
| ATOM | 166 | HN   | VAL | 12 | -2.803 | 5.539  | -2.491 |
| ATOM | 167 | CA   | VAL | 12 | -3.665 | 7.029  | -3.766 |
| ATOM | 168 | HA   | VAL | 12 | -3.548 | 8.001  | -3.975 |
| ATOM | 169 | CB   | VAL | 12 | -3.280 | 6.236  | -5.080 |
| ATOM | 170 | HB   | VAL | 12 | -2.660 | 6.864  | -5.551 |
| ATOM | 171 | CG1  | VAL | 12 | -2.596 | 4.894  | -4.786 |
| ATOM | 172 | HG11 | VAL | 12 | -2.188 | 4.928  | -3.874 |
| ATOM | 173 | HG12 | VAL | 12 | -3.279 | 4.164  | -4.826 |
| ATOM | 174 | HG13 | VAL | 12 | -1.885 | 4.734  | -5.471 |
| ATOM | 175 | CG2  | VAL | 12 | -4.476 | 5.900  | -5.954 |
| ATOM | 176 | HG21 | VAL | 12 | -5.223 | 6.529  | -5.740 |
| ATOM | 177 | HG22 | VAL | 12 | -4.216 | 5.995  | -6.914 |
| ATOM | 178 | HG23 | VAL | 12 | -4.761 | 4.959  | -5.769 |
| ATOM | 179 | C    | VAL | 12 | -5.108 | 6.783  | -3.296 |
| ATOM | 180 | O    | VAL | 12 | -5.357 | 6.148  | -2.287 |
| ATOM | 181 | N    | HIS | 13 | -6.017 | 7.300  | -4.072 |
| ATOM | 182 | HN   | HIS | 13 | -5.726 | 7.799  | -4.886 |
| ATOM | 183 | CA   | HIS | 13 | -7.479 | 7.171  | -3.782 |
| ATOM | 184 | HA   | HIS | 13 | -7.634 | 7.180  | -2.794 |
| ATOM | 185 | CB   | HIS | 13 | -8.192 | 8.366  | -4.446 |
| ATOM | 186 | HB1  | HIS | 13 | -9.175 | 8.238  | -4.304 |
| ATOM | 187 | HB2  | HIS | 13 | -7.836 | 8.440  | -5.378 |
| ATOM | 188 | CG   | HIS | 13 | -7.794 | 9.648  | -3.706 |
| ATOM | 189 | ND1  | HIS | 13 | -8.622 | 10.464 | -3.141 |
| ATOM | 190 | HD1  | HIS | 13 | -9.613 | 10.355 | -3.121 |
| ATOM | 191 | CE1  | HIS | 13 | -7.968 | 11.446 | -2.603 |
| ATOM | 192 | HE1  | HIS | 13 | -8.398 | 12.200 | -2.107 |
| ATOM | 193 | NE2  | HIS | 13 | -6.676 | 11.328 | -2.787 |
| ATOM | 194 | CD2  | HIS | 13 | -6.547 | 10.211 | -3.475 |
| ATOM | 195 | HD2  | HIS | 13 | -5.679 | 9.825  | -3.785 |
| ATOM | 196 | C    | HIS | 13 | -8.038 | 5.833  | -4.296 |
| ATOM | 197 | O    | HIS | 13 | -9.204 | 5.719  | -4.628 |
| ATOM | 198 | N    | HIS | 14 | -7.169 | 4.853  | -4.341 |
| ATOM | 199 | HN   | HIS | 14 | -6.232 | 5.034  | -4.044 |

|      |     |      |     |    |         |        |         |
|------|-----|------|-----|----|---------|--------|---------|
| ATOM | 200 | CA   | HIS | 14 | -7.518  | 3.481  | -4.810  |
| ATOM | 201 | HA   | HIS | 14 | -8.480  | 3.283  | -4.619  |
| ATOM | 202 | CB   | HIS | 14 | -7.293  | 3.358  | -6.328  |
| ATOM | 203 | HB1  | HIS | 14 | -7.584  | 2.438  | -6.593  |
| ATOM | 204 | HB2  | HIS | 14 | -6.352  | 3.646  | -6.507  |
| ATOM | 205 | CG   | HIS | 14 | -8.201  | 4.334  | -7.049  |
| ATOM | 206 | ND1  | HIS | 14 | -9.473  | 4.221  | -7.242  |
| ATOM | 207 | HD1  | HIS | 14 | -10.038 | 3.460  | -6.937  |
| ATOM | 208 | CE1  | HIS | 14 | -9.897  | 5.259  | -7.896  |
| ATOM | 209 | HE1  | HIS | 14 | -10.848 | 5.400  | -8.166  |
| ATOM | 210 | NE2  | HIS | 14 | -8.923  | 6.097  | -8.160  |
| ATOM | 211 | CD2  | HIS | 14 | -7.861  | 5.522  | -7.632  |
| ATOM | 212 | HD2  | HIS | 14 | -6.937  | 5.901  | -7.653  |
| ATOM | 213 | C    | HIS | 14 | -6.594  | 2.507  | -4.083  |
| ATOM | 214 | O    | HIS | 14 | -5.409  | 2.460  | -4.359  |
| ATOM | 215 | N    | GLN | 15 | -7.141  | 1.741  | -3.170  |
| ATOM | 216 | HN   | GLN | 15 | -8.117  | 1.818  | -2.980  |
| ATOM | 217 | CA   | GLN | 15 | -6.304  | 0.755  | -2.413  |
| ATOM | 218 | HA   | GLN | 15 | -5.607  | 1.254  | -1.897  |
| ATOM | 219 | CB   | GLN | 15 | -7.219  | -0.043 | -1.440  |
| ATOM | 220 | HB1  | GLN | 15 | -7.054  | -1.014 | -1.618  |
| ATOM | 221 | HB2  | GLN | 15 | -8.142  | 0.327  | -1.544  |
| ATOM | 222 | CG   | GLN | 15 | -6.797  | 0.216  | 0.027   |
| ATOM | 223 | HG1  | GLN | 15 | -7.536  | -0.132 | 0.606   |
| ATOM | 224 | HG2  | GLN | 15 | -6.540  | 1.181  | 0.086   |
| ATOM | 225 | CD   | GLN | 15 | -5.544  | -0.599 | 0.374   |
| ATOM | 226 | OE1  | GLN | 15 | -4.506  | -0.472 | -0.244  |
| ATOM | 227 | NE2  | GLN | 15 | -5.594  | -1.453 | 1.361   |
| ATOM | 228 | HE21 | GLN | 15 | -4.779  | -1.984 | 1.585   |
| ATOM | 229 | HE22 | GLN | 15 | -6.446  | -1.559 | 1.868   |
| ATOM | 230 | C    | GLN | 15 | -5.580  | -0.216 | -3.367  |
| ATOM | 231 | O    | GLN | 15 | -4.654  | -0.903 | -2.983  |
| ATOM | 232 | N    | LYS | 16 | -6.019  | -0.226 | -4.603  |
| ATOM | 233 | HN   | LYS | 16 | -6.770  | 0.380  | -4.852  |
| ATOM | 234 | CA   | LYS | 16 | -5.430  | -1.108 | -5.637  |
| ATOM | 235 | HA1  | LYS | 16 | -5.282  | -2.042 | -5.311  |
| ATOM | 236 | CB   | LYS | 16 | -6.421  | -1.160 | -6.834  |
| ATOM | 237 | HB1  | LYS | 16 | -5.995  | -0.652 | -7.584  |
| ATOM | 238 | HB2  | LYS | 16 | -7.312  | -0.866 | -6.485  |
| ATOM | 239 | CG   | LYS | 16 | -6.596  | -2.606 | -7.324  |
| ATOM | 240 | HG1  | LYS | 16 | -7.127  | -2.567 | -8.171  |
| ATOM | 241 | HG2  | LYS | 16 | -6.943  | -3.140 | -6.551  |
| ATOM | 242 | CD   | LYS | 16 | -5.214  | -3.177 | -7.682  |
| ATOM | 243 | HD1  | LYS | 16 | -4.817  | -3.527 | -6.832  |
| ATOM | 244 | HD2  | LYS | 16 | -4.730  | -2.466 | -8.193  |
| ATOM | 245 | CE   | LYS | 16 | -5.363  | -4.377 | -8.632  |
| ATOM | 246 | HE1  | LYS | 16 | -6.085  | -4.956 | -8.251  |
| ATOM | 247 | HE2  | LYS | 16 | -4.447  | -4.756 | -8.765  |
| ATOM | 248 | NZ   | LYS | 16 | -5.838  | -3.919 | -9.969  |
| ATOM | 249 | HZ1  | LYS | 16 | -6.058  | -2.947 | -9.920  |
| ATOM | 250 | HZ2  | LYS | 16 | -5.116  | -4.072 | -10.640 |
| ATOM | 251 | HZ3  | LYS | 16 | -6.652  | -4.439 | -10.221 |
| ATOM | 252 | C    | LYS | 16 | -4.086  | -0.510 | -6.032  |
| ATOM | 253 | O    | LYS | 16 | -3.047  | -1.137 | -5.937  |
| ATOM | 254 | N    | LEU | 17 | -4.160  | 0.722  | -6.464  |
| ATOM | 255 | HN   | LEU | 17 | -5.045  | 1.178  | -6.512  |
| ATOM | 256 | CA   | LEU | 17 | -2.928  | 1.444  | -6.884  |

|      |     |      |     |    |        |        |         |
|------|-----|------|-----|----|--------|--------|---------|
| ATOM | 257 | HA   | LEU | 17 | -2.472 | 0.983  | -7.645  |
| ATOM | 258 | CB   | LEU | 17 | -3.313 | 2.867  | -7.345  |
| ATOM | 259 | HB1  | LEU | 17 | -2.455 | 3.307  | -7.613  |
| ATOM | 260 | HB2  | LEU | 17 | -3.854 | 3.259  | -6.599  |
| ATOM | 261 | CG   | LEU | 17 | -4.239 | 2.917  | -8.620  |
| ATOM | 262 | HG   | LEU | 17 | -5.169 | 3.063  | -8.284  |
| ATOM | 263 | CD1  | LEU | 17 | -3.773 | 4.065  | -9.546  |
| ATOM | 264 | HD11 | LEU | 17 | -3.710 | 4.909  | -9.013  |
| ATOM | 265 | HD12 | LEU | 17 | -2.877 | 3.834  | -9.926  |
| ATOM | 266 | HD13 | LEU | 17 | -4.438 | 4.178  | -10.285 |
| ATOM | 267 | CD2  | LEU | 17 | -4.253 | 1.606  | -9.434  |
| ATOM | 268 | HD21 | LEU | 17 | -4.262 | 0.831  | -8.803  |
| ATOM | 269 | HD22 | LEU | 17 | -5.072 | 1.588  | -10.008 |
| ATOM | 270 | HD23 | LEU | 17 | -3.434 | 1.569  | -10.007 |
| ATOM | 271 | C    | LEU | 17 | -1.986 | 1.493  | -5.672  |
| ATOM | 272 | O    | LEU | 17 | -0.791 | 1.371  | -5.827  |
| ATOM | 273 | N    | VAL | 18 | -2.542 | 1.664  | -4.496  |
| ATOM | 274 | HN   | VAL | 18 | -3.534 | 1.760  | -4.439  |
| ATOM | 275 | CA   | VAL | 18 | -1.733 | 1.720  | -3.240  |
| ATOM | 276 | HA   | VAL | 18 | -1.139 | 2.524  | -3.220  |
| ATOM | 277 | CB   | VAL | 18 | -2.722 | 1.788  | -2.035  |
| ATOM | 278 | HB   | VAL | 18 | -3.468 | 1.152  | -2.232  |
| ATOM | 279 | CG1  | VAL | 18 | -2.038 | 1.373  | -0.727  |
| ATOM | 280 | HG11 | VAL | 18 | -2.056 | 2.142  | -0.090  |
| ATOM | 281 | HG12 | VAL | 18 | -2.529 | 0.594  | -0.335  |
| ATOM | 282 | HG13 | VAL | 18 | -1.091 | 1.113  | -0.921  |
| ATOM | 283 | CG2  | VAL | 18 | -3.277 | 3.215  | -1.866  |
| ATOM | 284 | HG21 | VAL | 18 | -2.990 | 3.573  | -0.977  |
| ATOM | 285 | HG22 | VAL | 18 | -2.918 | 3.793  | -2.598  |
| ATOM | 286 | HG23 | VAL | 18 | -4.275 | 3.184  | -1.915  |
| ATOM | 287 | C    | VAL | 18 | -0.841 | 0.464  | -3.163  |
| ATOM | 288 | O    | VAL | 18 | 0.359  | 0.566  | -3.004  |
| ATOM | 289 | N    | PHE | 19 | -1.455 | -0.688 | -3.288  |
| ATOM | 290 | HN   | PHE | 19 | -2.444 | -0.704 | -3.422  |
| ATOM | 291 | CA   | PHE | 19 | -0.695 | -1.977 | -3.231  |
| ATOM | 292 | HA   | PHE | 19 | -0.313 | -2.081 | -2.312  |
| ATOM | 293 | CB   | PHE | 19 | -1.643 | -3.158 | -3.537  |
| ATOM | 294 | HCB1 | PHE | 19 | -1.077 | -3.984 | -3.517  |
| ATOM | 295 | HCB2 | PHE | 19 | -2.129 | -2.916 | -4.377  |
| ATOM | 296 | CG   | PHE | 19 | -2.721 | -3.349 | -2.453  |
| ATOM | 297 | CD1  | PHE | 19 | -2.443 | -3.200 | -1.100  |
| ATOM | 298 | HCD1 | PHE | 19 | -1.519 | -2.956 | -0.808  |
| ATOM | 299 | CE1  | PHE | 19 | -3.432 | -3.385 | -0.155  |
| ATOM | 300 | HCE1 | PHE | 19 | -3.221 | -3.275 | 0.815   |
| ATOM | 301 | CZ   | PHE | 19 | -4.710 | -3.722 | -0.547  |
| ATOM | 302 | HCZ  | PHE | 19 | -5.424 | -3.855 | 0.137   |
| ATOM | 303 | CE2  | PHE | 19 | -4.999 | -3.872 | -1.886  |
| ATOM | 304 | HCE2 | PHE | 19 | -5.924 | -4.116 | -2.173  |
| ATOM | 305 | CD2  | PHE | 19 | -4.010 | -3.687 | -2.832  |
| ATOM | 306 | HCD2 | PHE | 19 | -4.227 | -3.796 | -3.801  |
| ATOM | 307 | C    | PHE | 19 | 0.443  | -1.972 | -4.250  |
| ATOM | 308 | O    | PHE | 19 | 1.579  | -2.276 | -3.931  |
| ATOM | 309 | N    | PHE | 20 | 0.098  | -1.613 | -5.460  |
| ATOM | 310 | HN   | PHE | 20 | -0.851 | -1.370 | -5.651  |
| ATOM | 311 | CA   | PHE | 20 | 1.114  | -1.565 | -6.550  |
| ATOM | 312 | HA   | PHE | 20 | 1.514  | -2.460 | -6.746  |
| ATOM | 313 | CB   | PHE | 20 | 0.381  | -1.052 | -7.831  |



|      |     |         |    |        |        |         |
|------|-----|---------|----|--------|--------|---------|
| ATOM | 314 | HC1PHE  | 20 | -0.410 | -0.530 | -7.511  |
| ATOM | 315 | HC2PHE  | 20 | 0.240  | -1.853 | -8.413  |
| ATOM | 316 | CG PHE  | 20 | 1.237  | -0.072 | -8.645  |
| ATOM | 317 | CD1 PHE | 20 | 2.270  | -0.536 | -9.438  |
| ATOM | 318 | HCD1PHE | 20 | 2.459  | -1.516 | -9.484  |
| ATOM | 319 | CE1 PHE | 20 | 3.042  | 0.346  | -10.165 |
| ATOM | 320 | HCE1PHE | 20 | 3.786  | 0.003  | -10.736 |
| ATOM | 321 | CZ PHE  | 20 | 2.789  | 1.701  | -10.105 |
| ATOM | 322 | HCZ PHE | 20 | 3.349  | 2.339  | -10.630 |
| ATOM | 323 | CE2 PHE | 20 | 1.759  | 2.170  | -9.315  |
| ATOM | 324 | HCE2PHE | 20 | 1.572  | 3.150  | -9.269  |
| ATOM | 325 | CD2 PHE | 20 | 0.990  | 1.288  | -8.591  |
| ATOM | 326 | HCD2PHE | 20 | 0.247  | 1.634  | -8.019  |
| ATOM | 327 | C PHE   | 20 | 2.276  | -0.649 | -6.113  |
| ATOM | 328 | O PHE   | 20 | 3.421  | -1.053 | -6.100  |
| ATOM | 329 | N ALA   | 21 | 1.931  | 0.560  | -5.752  |
| ATOM | 330 | HN ALA  | 21 | 0.967  | 0.811  | -5.777  |
| ATOM | 331 | CA ALA  | 21 | 2.934  | 1.574  | -5.305  |
| ATOM | 332 | HA ALA  | 21 | 3.527  | 1.820  | -6.072  |
| ATOM | 333 | CB ALA  | 21 | 2.169  | 2.811  | -4.803  |
| ATOM | 334 | HB1 ALA | 21 | 2.670  | 3.215  | -4.037  |
| ATOM | 335 | HB2 ALA | 21 | 2.094  | 3.473  | -5.549  |
| ATOM | 336 | HB3 ALA | 21 | 1.257  | 2.530  | -4.503  |
| ATOM | 337 | C ALA   | 21 | 3.837  | 1.021  | -4.208  |
| ATOM | 338 | O ALA   | 21 | 5.033  | 1.193  | -4.263  |
| ATOM | 339 | N GLU   | 22 | 3.259  | 0.369  | -3.237  |
| ATOM | 340 | HN GLU  | 22 | 2.266  | 0.257  | -3.240  |
| ATOM | 341 | CA GLU  | 22 | 4.066  | -0.214 | -2.121  |
| ATOM | 342 | HA GLU  | 22 | 4.529  | 0.518  | -1.621  |
| ATOM | 343 | CB GLU  | 22 | 3.131  | -0.970 | -1.166  |
| ATOM | 344 | HB1 GLU | 22 | 3.712  | -1.507 | -0.553  |
| ATOM | 345 | HB2 GLU | 22 | 2.453  | -1.437 | -1.734  |
| ATOM | 346 | CG GLU  | 22 | 2.365  | 0.034  | -0.288  |
| ATOM | 347 | HG1 GLU | 22 | 1.953  | 0.707  | -0.903  |
| ATOM | 348 | HG2 GLU | 22 | 2.996  | 0.341  | 0.426   |
| ATOM | 349 | CD GLU  | 22 | 1.215  | -0.704 | 0.410   |
| ATOM | 350 | OE1 GLU | 22 | 0.168  | -0.784 | -0.211  |
| ATOM | 351 | OE2 GLU | 22 | 1.443  | -1.150 | 1.524   |
| ATOM | 352 | C GLU   | 22 | 5.121  | -1.170 | -2.686  |
| ATOM | 353 | O GLU   | 22 | 6.289  | -1.042 | -2.379  |
| ATOM | 354 | N ASP   | 23 | 4.672  | -2.097 | -3.501  |
| ATOM | 355 | HN ASP  | 23 | 3.694  | -2.136 | -3.704  |
| ATOM | 356 | CA ASP  | 23 | 5.594  | -3.096 | -4.130  |
| ATOM | 357 | HA ASP  | 23 | 5.938  | -3.725 | -3.433  |
| ATOM | 358 | CB ASP  | 23 | 4.826  | -3.884 | -5.202  |
| ATOM | 359 | HB1 ASP | 23 | 4.807  | -3.314 | -6.024  |
| ATOM | 360 | HB2 ASP | 23 | 3.964  | -4.177 | -4.786  |
| ATOM | 361 | CG ASP  | 23 | 5.607  | -5.157 | -5.555  |
| ATOM | 362 | OD1 ASP | 23 | 6.513  | -5.029 | -6.366  |
| ATOM | 363 | OD2 ASP | 23 | 5.263  | -6.185 | -4.997  |
| ATOM | 364 | C ASP   | 23 | 6.769  | -2.364 | -4.785  |
| ATOM | 365 | O ASP   | 23 | 7.931  | -2.637 | -4.563  |
| ATOM | 366 | N VAL   | 24 | 6.379  | -1.420 | -5.592  |
| ATOM | 367 | HN VAL  | 24 | 5.398  | -1.266 | -5.707  |
| ATOM | 368 | CA VAL  | 24 | 7.331  | -0.565 | -6.347  |
| ATOM | 369 | HA VAL  | 24 | 7.878  | -1.103 | -6.989  |
| ATOM | 370 | CB VAL  | 24 | 6.473  | 0.458  | -7.102  |

|      |     |      |     |    |        |        |        |
|------|-----|------|-----|----|--------|--------|--------|
| ATOM | 371 | HB   | VAL | 24 | 5.996  | 1.028  | -6.432 |
| ATOM | 372 | CG1  | VAL | 24 | 7.343  | 1.340  | -7.965 |
| ATOM | 373 | HG11 | VAL | 24 | 7.512  | 2.200  | -7.484 |
| ATOM | 374 | HG12 | VAL | 24 | 8.209  | 0.872  | -8.140 |
| ATOM | 375 | HG13 | VAL | 24 | 6.871  | 1.519  | -8.828 |
| ATOM | 376 | CG2  | VAL | 24 | 5.432  | -0.267 | -7.982 |
| ATOM | 377 | HG21 | VAL | 24 | 4.529  | 0.130  | -7.812 |
| ATOM | 378 | HG22 | VAL | 24 | 5.679  | -0.151 | -8.943 |
| ATOM | 379 | HG23 | VAL | 24 | 5.426  | -1.239 | -7.747 |
| ATOM | 380 | C    | VAL | 24 | 8.335  | 0.108  | -5.404 |
| ATOM | 381 | O    | VAL | 24 | 9.532  | 0.050  | -5.605 |
| ATOM | 382 | N    | GLY | 25 | 7.794  | 0.724  | -4.389 |
| ATOM | 383 | HN   | GLY | 25 | 6.803  | 0.717  | -4.297 |
| ATOM | 384 | CA   | GLY | 25 | 8.607  | 1.438  | -3.365 |
| ATOM | 385 | HA1  | GLY | 25 | 7.978  | 1.692  | -2.629 |
| ATOM | 386 | HA2  | GLY | 25 | 9.112  | 2.153  | -3.849 |
| ATOM | 387 | C    | GLY | 25 | 9.651  | 0.512  | -2.743 |
| ATOM | 388 | O    | GLY | 25 | 10.830 | 0.800  | -2.783 |
| ATOM | 389 | N    | SER | 26 | 9.193  | -0.587 | -2.193 |
| ATOM | 390 | HN   | SER | 26 | 8.211  | -0.773 | -2.199 |
| ATOM | 391 | CA   | SER | 26 | 10.138 | -1.564 | -1.556 |
| ATOM | 392 | HA   | SER | 26 | 10.555 | -1.136 | -0.754 |
| ATOM | 393 | CB   | SER | 26 | 9.366  | -2.839 | -1.106 |
| ATOM | 394 | HB1  | SER | 26 | 8.962  | -2.648 | -0.211 |
| ATOM | 395 | HB2  | SER | 26 | 9.984  | -3.619 | -1.211 |
| ATOM | 396 | OG   | SER | 26 | 8.299  | -3.011 | -2.024 |
| ATOM | 397 | HG   | SER | 26 | 8.470  | -2.896 | -2.979 |
| ATOM | 398 | C    | SER | 26 | 11.239 | -1.949 | -2.549 |
| ATOM | 399 | O    | SER | 26 | 12.410 | -1.937 | -2.220 |
| ATOM | 400 | N    | ASN | 27 | 10.831 | -2.275 | -3.749 |
| ATOM | 401 | HN   | ASN | 27 | 9.853  | -2.263 | -3.952 |
| ATOM | 402 | CA   | ASN | 27 | 11.797 | -2.665 | -4.817 |
| ATOM | 403 | HA   | ASN | 27 | 12.251 | -3.519 | -4.564 |
| ATOM | 404 | CB   | ASN | 27 | 11.023 | -2.848 | -6.132 |
| ATOM | 405 | HB1  | ASN | 27 | 11.658 | -2.626 | -6.872 |
| ATOM | 406 | HB2  | ASN | 27 | 10.174 | -2.327 | -6.039 |
| ATOM | 407 | CG   | ASN | 27 | 10.625 | -4.314 | -6.321 |
| ATOM | 408 | OD1  | ASN | 27 | 11.457 | -5.176 | -6.528 |
| ATOM | 409 | ND2  | ASN | 27 | 9.364  | -4.643 | -6.258 |
| ATOM | 410 | HD21 | ASN | 27 | 9.102  | -5.598 | -6.381 |
| ATOM | 411 | HD22 | ASN | 27 | 8.677  | -3.937 | -6.087 |
| ATOM | 412 | C    | ASN | 27 | 12.869 | -1.593 | -4.991 |
| ATOM | 413 | O    | ASN | 27 | 14.043 | -1.854 | -4.828 |
| ATOM | 414 | N    | LYS | 28 | 12.428 | -0.407 | -5.316 |
| ATOM | 415 | HN   | LYS | 28 | 11.445 | -0.273 | -5.431 |
| ATOM | 416 | CA   | LYS | 28 | 13.349 | 0.752  | -5.520 |
| ATOM | 417 | HA1  | LYS | 28 | 13.925 | 0.639  | -6.329 |
| ATOM | 418 | CB   | LYS | 28 | 12.472 | 2.000  | -5.693 |
| ATOM | 419 | HB1  | LYS | 28 | 13.087 | 2.789  | -5.697 |
| ATOM | 420 | HB2  | LYS | 28 | 11.751 | 1.942  | -5.001 |
| ATOM | 421 | CG   | LYS | 28 | 11.772 | 1.970  | -7.077 |
| ATOM | 422 | HG1  | LYS | 28 | 10.962 | 2.553  | -7.005 |
| ATOM | 423 | HG2  | LYS | 28 | 11.664 | 1.007  | -7.324 |
| ATOM | 424 | CD   | LYS | 28 | 12.688 | 2.610  | -8.149 |
| ATOM | 425 | HD1  | LYS | 28 | 13.607 | 2.243  | -8.000 |
| ATOM | 426 | HD2  | LYS | 28 | 12.542 | 3.599  | -8.101 |
| ATOM | 427 | CE   | LYS | 28 | 12.255 | 2.164  | -9.559 |

|      |     |      |     |    |        |        |         |
|------|-----|------|-----|----|--------|--------|---------|
| ATOM | 428 | HE1  | LYS | 28 | 12.291 | 1.164  | -9.566  |
| ATOM | 429 | HE2  | LYS | 28 | 12.814 | 2.680  | -10.209 |
| ATOM | 430 | NZ   | LYS | 28 | 10.838 | 2.542  | -9.820  |
| ATOM | 431 | HZ1  | LYS | 28 | 10.814 | 3.250  | -10.527 |
| ATOM | 432 | HZ2  | LYS | 28 | 10.337 | 1.737  | -10.132 |
| ATOM | 433 | HZ3  | LYS | 28 | 10.435 | 2.890  | -8.978  |
| ATOM | 434 | C    | LYS | 28 | 14.283 | 0.873  | -4.304  |
| ATOM | 435 | O    | LYS | 28 | 15.471 | 1.066  | -4.457  |
| ATOM | 436 | N    | GLY | 29 | 13.731 | 0.752  | -3.121  |
| ATOM | 437 | HN   | GLY | 29 | 12.747 | 0.596  | -3.051  |
| ATOM | 438 | CA   | GLY | 29 | 14.555 | 0.843  | -1.879  |
| ATOM | 439 | HA1  | GLY | 29 | 13.964 | 0.575  | -1.118  |
| ATOM | 440 | HA2  | GLY | 29 | 14.979 | 1.750  | -1.877  |
| ATOM | 441 | C    | GLY | 29 | 15.694 | -0.182 | -1.943  |
| ATOM | 442 | O    | GLY | 29 | 16.853 | 0.164  | -1.820  |
| ATOM | 443 | N    | ALA | 30 | 15.332 | -1.427 | -2.150  |
| ATOM | 444 | HN   | ALA | 30 | 14.363 | -1.651 | -2.253  |
| ATOM | 445 | CA   | ALA | 30 | 16.365 | -2.510 | -2.232  |
| ATOM | 446 | HA   | ALA | 30 | 16.849 | -2.578 | -1.359  |
| ATOM | 447 | CB   | ALA | 30 | 15.662 | -3.842 | -2.541  |
| ATOM | 448 | HB1  | ALA | 30 | 14.988 | -4.028 | -1.826  |
| ATOM | 449 | HB2  | ALA | 30 | 15.207 | -3.772 | -3.429  |
| ATOM | 450 | HB3  | ALA | 30 | 16.344 | -4.573 | -2.565  |
| ATOM | 451 | C    | ALA | 30 | 17.391 | -2.191 | -3.325  |
| ATOM | 452 | O    | ALA | 30 | 18.580 | -2.293 | -3.119  |
| ATOM | 453 | N    | ILE | 31 | 16.888 | -1.804 | -4.465  |
| ATOM | 454 | HN   | ILE | 31 | 15.896 | -1.748 | -4.547  |
| ATOM | 455 | CA   | ILE | 31 | 17.718 | -1.442 | -5.645  |
| ATOM | 456 | HA   | ILE | 31 | 18.241 | -2.198 | -6.040  |
| ATOM | 457 | CB   | ILE | 31 | 16.689 | -0.924 | -6.698  |
| ATOM | 458 | HB   | ILE | 31 | 16.002 | -0.367 | -6.232  |
| ATOM | 459 | CG2  | ILE | 31 | 17.309 | 0.021  | -7.742  |
| ATOM | 460 | HG21 | ILE | 31 | 17.450 | 0.919  | -7.326  |
| ATOM | 461 | HG22 | ILE | 31 | 18.185 | -0.356 | -8.043  |
| ATOM | 462 | HG23 | ILE | 31 | 16.687 | 0.100  | -8.521  |
| ATOM | 463 | CG1  | ILE | 31 | 16.023 | -2.159 | -7.359  |
| ATOM | 464 | HG11 | ILE | 31 | 15.569 | -2.663 | -6.623  |
| ATOM | 465 | HG12 | ILE | 31 | 16.734 | -2.612 | -7.899  |
| ATOM | 466 | CD1  | ILE | 31 | 14.920 | -1.744 | -8.349  |
| ATOM | 467 | HD11 | ILE | 31 | 14.526 | -0.875 | -8.051  |
| ATOM | 468 | HD12 | ILE | 31 | 15.321 | -1.642 | -9.259  |
| ATOM | 469 | HD13 | ILE | 31 | 14.213 | -2.451 | -8.365  |
| ATOM | 470 | C    | ILE | 31 | 18.784 | -0.419 | -5.226  |
| ATOM | 471 | O    | ILE | 31 | 19.963 | -0.625 | -5.443  |
| ATOM | 472 | N    | ILE | 32 | 18.345 | 0.658  | -4.629  |
| ATOM | 473 | HN   | ILE | 32 | 17.365 | 0.773  | -4.479  |
| ATOM | 474 | CA   | ILE | 32 | 19.297 | 1.717  | -4.172  |
| ATOM | 475 | HA   | ILE | 32 | 19.777 | 2.126  | -4.948  |
| ATOM | 476 | CB   | ILE | 32 | 18.487 | 2.821  | -3.440  |
| ATOM | 477 | HB   | ILE | 32 | 17.994 | 2.417  | -2.669  |
| ATOM | 478 | CG2  | ILE | 32 | 19.447 | 3.915  | -2.910  |
| ATOM | 479 | HG21 | ILE | 32 | 18.981 | 4.441  | -2.198  |
| ATOM | 480 | HG22 | ILE | 32 | 20.262 | 3.477  | -2.531  |
| ATOM | 481 | HG23 | ILE | 32 | 19.704 | 4.517  | -3.666  |
| ATOM | 482 | CG1  | ILE | 32 | 17.486 | 3.455  | -4.444  |
| ATOM | 483 | HG11 | ILE | 32 | 17.077 | 2.701  | -4.959  |
| ATOM | 484 | HG12 | ILE | 32 | 17.984 | 4.171  | -4.934  |

|      |     |      |     |    |        |        |         |
|------|-----|------|-----|----|--------|--------|---------|
| ATOM | 485 | CD1  | ILE | 32 | 16.336 | 4.149  | -3.690  |
| ATOM | 486 | HD11 | ILE | 32 | 16.718 | 4.851  | -3.088  |
| ATOM | 487 | HD12 | ILE | 32 | 15.717 | 4.569  | -4.354  |
| ATOM | 488 | HD13 | ILE | 32 | 15.844 | 3.467  | -3.149  |
| ATOM | 489 | C    | ILE | 32 | 20.336 | 1.086  | -3.238  |
| ATOM | 490 | O    | ILE | 32 | 21.523 | 1.292  | -3.401  |
| ATOM | 491 | N    | GLY | 33 | 19.855 | 0.321  | -2.288  |
| ATOM | 492 | HN   | GLY | 33 | 18.868 | 0.189  | -2.211  |
| ATOM | 493 | CA   | GLY | 33 | 20.774 | -0.352 | -1.322  |
| ATOM | 494 | HA1  | GLY | 33 | 20.223 | -1.016 | -0.814  |
| ATOM | 495 | HA2  | GLY | 33 | 21.252 | 0.373  | -0.824  |
| ATOM | 496 | C    | GLY | 33 | 21.841 | -1.149 | -2.079  |
| ATOM | 497 | O    | GLY | 33 | 23.017 | -1.031 | -1.801  |
| ATOM | 498 | N    | LEU | 34 | 21.402 | -1.936 | -3.031  |
| ATOM | 499 | HN   | LEU | 34 | 20.423 | -1.985 | -3.215  |
| ATOM | 500 | CA   | LEU | 34 | 22.349 | -2.758 | -3.841  |
| ATOM | 501 | HA   | LEU | 34 | 22.835 | -3.390 | -3.237  |
| ATOM | 502 | CB   | LEU | 34 | 21.551 | -3.554 | -4.897  |
| ATOM | 503 | HB1  | LEU | 34 | 22.221 | -3.997 | -5.494  |
| ATOM | 504 | HB2  | LEU | 34 | 20.884 | -2.921 | -5.292  |
| ATOM | 505 | CG   | LEU | 34 | 20.744 | -4.689 | -4.208  |
| ATOM | 506 | HG   | LEU | 34 | 20.409 | -4.373 | -3.320  |
| ATOM | 507 | CD1  | LEU | 34 | 19.549 | -5.079 | -5.103  |
| ATOM | 508 | HD11 | LEU | 34 | 18.780 | -4.472 | -4.902  |
| ATOM | 509 | HD12 | LEU | 34 | 19.816 | -4.985 | -6.062  |
| ATOM | 510 | HD13 | LEU | 34 | 19.294 | -6.027 | -4.911  |
| ATOM | 511 | CD2  | LEU | 34 | 21.654 | -5.922 | -4.005  |
| ATOM | 512 | HD21 | LEU | 34 | 22.174 | -5.808 | -3.158  |
| ATOM | 513 | HD22 | LEU | 34 | 21.084 | -6.742 | -3.947  |
| ATOM | 514 | HD23 | LEU | 34 | 22.280 | -5.997 | -4.781  |
| ATOM | 515 | C    | LEU | 34 | 23.379 | -1.865 | -4.532  |
| ATOM | 516 | O    | LEU | 34 | 24.557 | -2.153 | -4.474  |
| ATOM | 517 | N    | MET | 35 | 22.918 | -0.811 | -5.165  |
| ATOM | 518 | HN   | MET | 35 | 21.935 | -0.633 | -5.178  |
| ATOM | 519 | CA   | MET | 35 | 23.856 | 0.121  | -5.865  |
| ATOM | 520 | HA   | MET | 35 | 24.275 | -0.337 | -6.648  |
| ATOM | 521 | CB   | MET | 35 | 23.069 | 1.354  | -6.362  |
| ATOM | 522 | HB1  | MET | 35 | 23.744 | 2.023  | -6.675  |
| ATOM | 523 | HB2  | MET | 35 | 22.433 | 1.605  | -5.631  |
| ATOM | 524 | CG   | MET | 35 | 22.220 | 0.974  | -7.584  |
| ATOM | 525 | HG1  | MET | 35 | 21.676 | 1.788  | -7.790  |
| ATOM | 526 | HG2  | MET | 35 | 21.756 | 0.125  | -7.327  |
| ATOM | 527 | SD   | MET | 35 | 23.094 | 0.589  | -9.123  |
| ATOM | 528 | CE   | MET | 35 | 23.653 | 2.262  | -9.535  |
| ATOM | 529 | HE1  | MET | 35 | 23.580 | 2.839  | -8.722  |
| ATOM | 530 | HE2  | MET | 35 | 24.604 | 2.222  | -9.840  |
| ATOM | 531 | HE3  | MET | 35 | 23.076 | 2.627  | -10.266 |
| ATOM | 532 | C    | MET | 35 | 24.958 | 0.558  | -4.890  |
| ATOM | 533 | O    | MET | 35 | 26.134 | 0.402  | -5.163  |
| ATOM | 534 | N    | VAL | 36 | 24.507 | 1.076  | -3.775  |
| ATOM | 535 | HN   | VAL | 36 | 23.519 | 1.146  | -3.645  |
| ATOM | 536 | CA   | VAL | 36 | 25.413 | 1.563  | -2.692  |
| ATOM | 537 | HA   | VAL | 36 | 25.947 | 2.351  | -3.001  |
| ATOM | 538 | CB   | VAL | 36 | 24.518 | 1.981  | -1.481  |
| ATOM | 539 | HB   | VAL | 36 | 23.911 | 1.219  | -1.255  |
| ATOM | 540 | CG1  | VAL | 36 | 25.389 | 2.315  | -0.246  |
| ATOM | 541 | HG11 | VAL | 36 | 25.058 | 3.164  | 0.166   |

|      |     |         |    |        |        |         |
|------|-----|---------|----|--------|--------|---------|
| ATOM | 542 | HG12VAL | 36 | 25.320 | 1.566  | 0.413   |
| ATOM | 543 | HG13VAL | 36 | 26.339 | 2.426  | -0.538  |
| ATOM | 544 | CG2 VAL | 36 | 23.695 | 3.234  | -1.860  |
| ATOM | 545 | HG21VAL | 36 | 23.768 | 3.907  | -1.124  |
| ATOM | 546 | HG22VAL | 36 | 24.058 | 3.618  | -2.709  |
| ATOM | 547 | HG23VAL | 36 | 22.739 | 2.970  | -1.987  |
| ATOM | 548 | C VAL   | 36 | 26.418 | 0.467  | -2.301  |
| ATOM | 549 | O VAL   | 36 | 27.614 | 0.696  | -2.307  |
| ATOM | 550 | N GLY   | 37 | 25.895 | -0.691 | -1.978  |
| ATOM | 551 | HN GLY  | 37 | 24.903 | -0.800 | -2.001  |
| ATOM | 552 | CA GLY  | 37 | 26.746 | -1.851 | -1.577  |
| ATOM | 553 | HA1 GLY | 37 | 26.320 | -2.256 | -0.768  |
| ATOM | 554 | HA2 GLY | 37 | 27.687 | -1.514 | -1.522  |
| ATOM | 555 | C GLY   | 37 | 26.722 | -2.918 | -2.671  |
| ATOM | 556 | O GLY   | 37 | 26.278 | -4.028 | -2.444  |
| ATOM | 557 | N GLY   | 38 | 27.200 | -2.544 | -3.834  |
| ATOM | 558 | HN GLY  | 38 | 27.544 | -1.614 | -3.946  |
| ATOM | 559 | CA GLY  | 38 | 27.234 | -3.490 | -4.992  |
| ATOM | 560 | HA1 GLY | 38 | 26.336 | -3.437 | -5.432  |
| ATOM | 561 | HA2 GLY | 38 | 27.556 | -4.368 | -4.636  |
| ATOM | 562 | C GLY   | 38 | 28.257 | -3.034 | -6.028  |
| ATOM | 563 | O GLY   | 38 | 28.973 | -3.847 | -6.584  |
| ATOM | 564 | N VAL   | 39 | 28.303 | -1.743 | -6.259  |
| ATOM | 565 | HN VAL  | 39 | 27.682 | -1.135 | -5.765  |
| ATOM | 566 | CA VAL  | 39 | 29.263 | -1.166 | -7.249  |
| ATOM | 567 | HA VAL  | 39 | 29.411 | -1.789 | -8.017  |
| ATOM | 568 | CB VAL  | 39 | 28.653 | 0.172  | -7.790  |
| ATOM | 569 | HB VAL  | 39 | 28.666 | 0.843  | -7.048  |
| ATOM | 570 | CG1 VAL | 39 | 29.480 | 0.695  | -8.993  |
| ATOM | 571 | HG11VAL | 39 | 29.803 | 1.620  | -8.789  |
| ATOM | 572 | HG12VAL | 39 | 30.260 | 0.087  | -9.141  |
| ATOM | 573 | HG13VAL | 39 | 28.899 | 0.709  | -9.807  |
| ATOM | 574 | CG2 VAL | 39 | 27.200 | -0.071 | -8.276  |
| ATOM | 575 | HG21VAL | 39 | 26.589 | 0.567  | -7.807  |
| ATOM | 576 | HG22VAL | 39 | 27.157 | 0.080  | -9.264  |
| ATOM | 577 | HG23VAL | 39 | 26.938 | -1.012 | -8.064  |
| ATOM | 578 | C VAL   | 39 | 30.627 | -0.939 | -6.564  |
| ATOM | 579 | O VAL   | 39 | 31.386 | -0.053 | -6.911  |
| ATOM | 580 | N VAL   | 40 | 30.891 | -1.776 | -5.593  |
| ATOM | 581 | HN VAL  | 40 | 30.219 | -2.479 | -5.368  |
| ATOM | 582 | CA VAL  | 40 | 32.164 | -1.714 | -4.814  |
| ATOM | 583 | HA VAL  | 40 | 32.304 | -0.794 | -4.449  |
| ATOM | 584 | CB VAL  | 40 | 32.070 | -2.730 | -3.641  |
| ATOM | 585 | HB VAL  | 40 | 31.974 | -3.650 | -4.021  |
| ATOM | 586 | CG1 VAL | 40 | 33.350 | -2.663 | -2.775  |
| ATOM | 587 | HG11VAL | 40 | 33.271 | -1.899 | -2.135  |
| ATOM | 588 | HG12VAL | 40 | 33.448 | -3.521 | -2.271  |
| ATOM | 589 | HG13VAL | 40 | 34.141 | -2.527 | -3.372  |
| ATOM | 590 | CG2 VAL | 40 | 30.844 | -2.395 | -2.760  |
| ATOM | 591 | HG21VAL | 40 | 31.072 | -1.626 | -2.163  |
| ATOM | 592 | HG22VAL | 40 | 30.075 | -2.151 | -3.351  |
| ATOM | 593 | HG23VAL | 40 | 30.610 | -3.196 | -2.209  |
| ATOM | 594 | C VAL   | 40 | 33.355 | -2.051 | -5.733  |
| ATOM | 595 | O VAL   | 40 | 34.308 | -1.291 | -5.691  |
| ATOM | 596 | NA NA   | 41 | 6.208  | 8.402  | -13.354 |
| ATOM | 597 | NA NA   | 42 | -3.792 | 12.402 | -0.354  |
| ATOM | 598 | NA NA   | 43 | 34.208 | -0.598 | -9.354  |

**Final MD structure (after 10 ns relaxation) of the second NMR isoform with 3 Na<sup>+</sup> counterions**

|      |    |         |     |   |        |        |         |
|------|----|---------|-----|---|--------|--------|---------|
| ATOM | 1  | N       | ASP | 1 | 17.508 | 5.154  | -12.330 |
| ATOM | 2  | HN      | ASP | 1 | 17.824 | 6.036  | -11.955 |
| ATOM | 3  | CA      | ASP | 1 | 16.309 | 5.118  | -13.135 |
| ATOM | 4  | HA      | ASP | 1 | 16.507 | 4.934  | -14.103 |
| ATOM | 5  | CB      | ASP | 1 | 15.396 | 4.110  | -12.506 |
| ATOM | 6  | HB1     | ASP | 1 | 15.203 | 4.468  | -11.566 |
| ATOM | 7  | HB2     | ASP | 1 | 15.829 | 3.210  | -12.438 |
| ATOM | 8  | CG      | ASP | 1 | 13.970 | 4.025  | -13.084 |
| ATOM | 9  | OD1     | ASP | 1 | 13.611 | 4.708  | -14.034 |
| ATOM | 10 | OD2     | ASP | 1 | 13.347 | 3.033  | -12.869 |
| ATOM | 11 | C       | ASP | 1 | 15.867 | 6.530  | -12.943 |
| ATOM | 12 | O       | ASP | 1 | 16.240 | 7.167  | -11.969 |
| ATOM | 13 | N       | ALA | 2 | 15.115 | 7.139  | -13.823 |
| ATOM | 14 | HN      | ALA | 2 | 14.818 | 6.611  | -14.652 |
| ATOM | 15 | CA      | ALA | 2 | 14.759 | 8.506  | -13.689 |
| ATOM | 16 | HA      | ALA | 2 | 15.319 | 8.964  | -12.959 |
| ATOM | 17 | CB      | ALA | 2 | 14.831 | 9.274  | -14.993 |
| ATOM | 18 | HB1     | ALA | 2 | 14.525 | 10.186 | -14.753 |
| ATOM | 19 | HB2     | ALA | 2 | 15.735 | 9.336  | -15.457 |
| ATOM | 20 | HB3     | ALA | 2 | 14.213 | 8.885  | -15.662 |
| ATOM | 21 | C       | ALA | 2 | 13.307 | 8.604  | -13.335 |
| ATOM | 22 | O       | ALA | 2 | 12.716 | 9.602  | -13.697 |
| ATOM | 23 | N       | GLU | 3 | 12.867 | 7.601  | -12.622 |
| ATOM | 24 | HN      | GLU | 3 | 13.462 | 6.813  | -12.404 |
| ATOM | 25 | CA      | GLU | 3 | 11.508 | 7.459  | -12.146 |
| ATOM | 26 | HA      | GLU | 3 | 11.545 | 6.740  | -11.529 |
| ATOM | 27 | CB      | GLU | 3 | 10.928 | 8.741  | -11.549 |
| ATOM | 28 | HB1     | GLU | 3 | 9.964  | 8.557  | -11.317 |
| ATOM | 29 | HB2     | GLU | 3 | 10.943 | 9.417  | -12.255 |
| ATOM | 30 | CG      | GLU | 3 | 11.720 | 9.405  | -10.354 |
| ATOM | 31 | HG1     | GLU | 3 | 11.341 | 10.256 | -10.011 |
| ATOM | 32 | HG2     | GLU | 3 | 12.675 | 9.449  | -10.599 |
| ATOM | 33 | CD      | GLU | 3 | 11.679 | 8.424  | -9.146  |
| ATOM | 34 | OE1     | GLU | 3 | 10.704 | 8.410  | -8.381  |
| ATOM | 35 | OE2     | GLU | 3 | 12.676 | 7.822  | -8.740  |
| ATOM | 36 | C       | GLU | 3 | 10.747 | 7.194  | -13.395 |
| ATOM | 37 | O       | GLU | 3 | 9.685  | 7.791  | -13.679 |
| ATOM | 38 | N       | PHE | 4 | 11.249 | 6.304  | -14.228 |
| ATOM | 39 | HN      | PHE | 4 | 12.067 | 5.819  | -14.046 |
| ATOM | 40 | CA      | PHE | 4 | 10.501 | 6.067  | -15.445 |
| ATOM | 41 | HA      | PHE | 4 | 9.713  | 6.561  | -15.561 |
| ATOM | 42 | CB      | PHE | 4 | 11.366 | 6.106  | -16.718 |
| ATOM | 43 | HCB1PHE | PHE | 4 | 10.756 | 5.748  | -17.408 |
| ATOM | 44 | HCB2PHE | PHE | 4 | 12.205 | 5.543  | -16.717 |

|      |    |      |     |   |        |        |         |
|------|----|------|-----|---|--------|--------|---------|
| ATOM | 45 | CG   | PHE | 4 | 11.781 | 7.475  | -17.129 |
| ATOM | 46 | CD1  | PHE | 4 | 10.851 | 8.564  | -16.885 |
| ATOM | 47 | HCD1 | PHE | 4 | 9.963  | 8.362  | -16.419 |
| ATOM | 48 | CE1  | PHE | 4 | 11.160 | 9.890  | -17.340 |
| ATOM | 49 | HCE1 | PHE | 4 | 10.476 | 10.603 | -17.176 |
| ATOM | 50 | CZ   | PHE | 4 | 12.387 | 10.242 | -18.013 |
| ATOM | 51 | HCZ  | PHE | 4 | 12.535 | 11.132 | -18.309 |
| ATOM | 52 | CE2  | PHE | 4 | 13.319 | 9.174  | -18.214 |
| ATOM | 53 | HCE2 | PHE | 4 | 14.215 | 9.304  | -18.662 |
| ATOM | 54 | CD2  | PHE | 4 | 13.048 | 7.795  | -17.824 |
| ATOM | 55 | HCD2 | PHE | 4 | 13.727 | 7.126  | -18.085 |
| ATOM | 56 | C    | PHE | 4 | 10.108 | 4.628  | -15.476 |
| ATOM | 57 | O    | PHE | 4 | 9.276  | 4.304  | -16.316 |
| ATOM | 58 | N    | ARG | 5 | 10.685 | 3.693  | -14.659 |
| ATOM | 59 | HN   | ARG | 5 | 11.302 | 3.860  | -13.932 |
| ATOM | 60 | CA   | ARG | 5 | 10.307 | 2.374  | -15.018 |
| ATOM | 61 | HA   | ARG | 5 | 9.884  | 2.516  | -15.968 |
| ATOM | 62 | CB   | ARG | 5 | 11.455 | 1.358  | -15.112 |
| ATOM | 63 | HB1  | ARG | 5 | 11.810 | 1.116  | -14.215 |
| ATOM | 64 | HB2  | ARG | 5 | 12.136 | 1.831  | -15.666 |
| ATOM | 65 | CG   | ARG | 5 | 11.158 | 0.043  | -15.927 |
| ATOM | 66 | HG1  | ARG | 5 | 12.011 | -0.468 | -15.999 |
| ATOM | 67 | HG2  | ARG | 5 | 10.801 | 0.355  | -16.839 |
| ATOM | 68 | CD   | ARG | 5 | 10.112 | -0.892 | -15.167 |
| ATOM | 69 | HD1  | ARG | 5 | 9.243  | -0.319 | -15.099 |
| ATOM | 70 | HD2  | ARG | 5 | 10.465 | -1.160 | -14.254 |
| ATOM | 71 | NE   | ARG | 5 | 9.717  | -2.048 | -15.984 |
| ATOM | 72 | HE   | ARG | 5 | 8.827  | -2.029 | -16.387 |
| ATOM | 73 | CZ   | ARG | 5 | 10.596 | -3.078 | -16.203 |
| ATOM | 74 | NH1  | ARG | 5 | 11.840 | -2.979 | -15.659 |
| ATOM | 75 | HH11 | ARG | 5 | 12.625 | -3.579 | -15.682 |
| ATOM | 76 | HH12 | ARG | 5 | 12.052 | -2.204 | -15.121 |
| ATOM | 77 | NH2  | ARG | 5 | 10.217 | -4.119 | -16.949 |
| ATOM | 78 | HH21 | ARG | 5 | 10.804 | -4.933 | -17.152 |
| ATOM | 79 | HH22 | ARG | 5 | 9.366  | -4.232 | -17.313 |
| ATOM | 80 | C    | ARG | 5 | 9.227  | 2.109  | -13.956 |
| ATOM | 81 | O    | ARG | 5 | 9.573  | 1.475  | -12.948 |
| ATOM | 82 | N    | HIS | 6 | 8.003  | 2.606  | -14.169 |
| ATOM | 83 | HN   | HIS | 6 | 7.976  | 3.035  | -15.038 |
| ATOM | 84 | CA   | HIS | 6 | 6.802  | 2.561  | -13.354 |
| ATOM | 85 | HA   | HIS | 6 | 6.245  | 3.232  | -13.758 |
| ATOM | 86 | CB   | HIS | 6 | 5.987  | 1.238  | -13.349 |
| ATOM | 87 | HB1  | HIS | 6 | 5.725  | 1.103  | -14.272 |
| ATOM | 88 | HB2  | HIS | 6 | 5.140  | 1.394  | -12.803 |
| ATOM | 89 | CG   | HIS | 6 | 6.567  | -0.024 | -12.747 |
| ATOM | 90 | ND1  | HIS | 6 | 7.369  | -0.195 | -11.704 |
| ATOM | 91 | HD1  | HIS | 6 | 7.726  | 0.537  | -11.149 |
| ATOM | 92 | CE1  | HIS | 6 | 7.631  | -1.488 | -11.593 |
| ATOM | 93 | HE1  | HIS | 6 | 8.207  | -1.844 | -10.906 |

|      |     |      |     |    |        |        |         |
|------|-----|------|-----|----|--------|--------|---------|
| ATOM | 94  | NE2  | HIS | 6  | 7.038  | -2.203 | -12.544 |
| ATOM | 95  | CD2  | HIS | 6  | 6.320  | -1.292 | -13.287 |
| ATOM | 96  | HD2  | HIS | 6  | 5.721  | -1.513 | -14.035 |
| ATOM | 97  | C    | HIS | 6  | 6.931  | 3.027  | -11.949 |
| ATOM | 98  | O    | HIS | 6  | 6.020  | 2.726  | -11.148 |
| ATOM | 99  | N    | ASP | 7  | 7.950  | 3.803  | -11.572 |
| ATOM | 100 | HN   | ASP | 7  | 8.735  | 4.126  | -12.138 |
| ATOM | 101 | CA   | ASP | 7  | 8.117  | 4.358  | -10.209 |
| ATOM | 102 | HA   | ASP | 7  | 8.418  | 3.590  | -9.547  |
| ATOM | 103 | CB   | ASP | 7  | 9.275  | 5.349  | -10.211 |
| ATOM | 104 | HB1  | ASP | 7  | 9.462  | 5.787  | -9.343  |
| ATOM | 105 | HB2  | ASP | 7  | 9.106  | 6.061  | -10.908 |
| ATOM | 106 | CG   | ASP | 7  | 10.466 | 4.529  | -10.506 |
| ATOM | 107 | OD1  | ASP | 7  | 11.161 | 4.145  | -9.668  |
| ATOM | 108 | OD2  | ASP | 7  | 10.693 | 4.062  | -11.636 |
| ATOM | 109 | C    | ASP | 7  | 6.957  | 5.139  | -9.797  |
| ATOM | 110 | O    | ASP | 7  | 6.438  | 5.987  | -10.528 |
| ATOM | 111 | N    | SER | 8  | 6.392  | 4.840  | -8.593  |
| ATOM | 112 | HN   | SER | 8  | 6.689  | 4.216  | -7.891  |
| ATOM | 113 | CA   | SER | 8  | 5.282  | 5.465  | -8.081  |
| ATOM | 114 | HA   | SER | 8  | 5.116  | 6.350  | -8.558  |
| ATOM | 115 | CB   | SER | 8  | 4.137  | 4.504  | -8.290  |
| ATOM | 116 | HB1  | SER | 8  | 3.306  | 4.868  | -7.988  |
| ATOM | 117 | HB2  | SER | 8  | 4.233  | 3.588  | -7.896  |
| ATOM | 118 | OG   | SER | 8  | 3.972  | 4.316  | -9.689  |
| ATOM | 119 | HG   | SER | 8  | 4.849  | 3.968  | -10.123 |
| ATOM | 120 | C    | SER | 8  | 5.569  | 5.825  | -6.744  |
| ATOM | 121 | O    | SER | 8  | 6.317  | 5.023  | -6.116  |
| ATOM | 122 | N    | GLY | 9  | 5.116  | 6.875  | -6.095  |
| ATOM | 123 | HN   | GLY | 9  | 4.572  | 7.612  | -6.511  |
| ATOM | 124 | CA   | GLY | 9  | 5.392  | 7.057  | -4.677  |
| ATOM | 125 | HA1  | GLY | 9  | 6.292  | 7.449  | -4.570  |
| ATOM | 126 | HA2  | GLY | 9  | 5.211  | 6.138  | -4.237  |
| ATOM | 127 | C    | GLY | 9  | 4.200  | 8.034  | -4.452  |
| ATOM | 128 | O    | GLY | 9  | 4.116  | 8.989  | -5.212  |
| ATOM | 129 | N    | TYR | 10 | 3.212  | 7.681  | -3.591  |
| ATOM | 130 | HN   | TYR | 10 | 3.206  | 6.874  | -3.047  |
| ATOM | 131 | CA   | TYR | 10 | 2.004  | 8.518  | -3.451  |
| ATOM | 132 | HA   | TYR | 10 | 2.307  | 9.439  | -3.100  |
| ATOM | 133 | CB   | TYR | 10 | 1.055  | 8.828  | -4.652  |
| ATOM | 134 | HCB1 | TYR | 10 | 1.405  | 9.427  | -5.349  |
| ATOM | 135 | HCB2 | TYR | 10 | 0.282  | 9.261  | -4.209  |
| ATOM | 136 | CG   | TYR | 10 | 0.721  | 7.554  | -5.358  |
| ATOM | 137 | CD1  | TYR | 10 | 1.319  | 7.345  | -6.636  |
| ATOM | 138 | HCD1 | TYR | 10 | 1.965  | 8.056  | -6.993  |
| ATOM | 139 | CE1  | TYR | 10 | 1.104  | 6.202  | -7.437  |
| ATOM | 140 | HCE1 | TYR | 10 | 1.617  | 6.160  | -8.378  |
| ATOM | 141 | CZ   | TYR | 10 | 0.246  | 5.120  | -6.902  |
| ATOM | 142 | OH   | TYR | 10 | 0.087  | 4.057  | -7.600  |



|      |     |      |     |    |        |       |        |
|------|-----|------|-----|----|--------|-------|--------|
| ATOM | 143 | HOH  | TYR | 10 | -0.111 | 3.259 | -6.964 |
| ATOM | 144 | CE2  | TYR | 10 | -0.413 | 5.328 | -5.613 |
| ATOM | 145 | HCE2 | TYR | 10 | -1.027 | 4.613 | -5.306 |
| ATOM | 146 | CD2  | TYR | 10 | -0.204 | 6.586 | -4.839 |
| ATOM | 147 | HCD2 | TYR | 10 | -0.629 | 6.839 | -3.999 |
| ATOM | 148 | C    | TYR | 10 | 1.316  | 7.795 | -2.376 |
| ATOM | 149 | O    | TYR | 10 | 1.636  | 6.644 | -2.098 |
| ATOM | 150 | N    | GLU | 11 | 0.288  | 8.339 | -1.819 |
| ATOM | 151 | HN   | GLU | 11 | -0.041 | 9.229 | -2.007 |
| ATOM | 152 | CA   | GLU | 11 | -0.479 | 7.704 | -0.809 |
| ATOM | 153 | HA   | GLU | 11 | -0.252 | 6.741 | -0.769 |
| ATOM | 154 | CB   | GLU | 11 | -0.264 | 8.365 | 0.560  |
| ATOM | 155 | HB1  | GLU | 11 | -0.401 | 9.358 | 0.432  |
| ATOM | 156 | HB2  | GLU | 11 | 0.696  | 8.169 | 0.771  |
| ATOM | 157 | CG   | GLU | 11 | -0.990 | 7.776 | 1.736  |
| ATOM | 158 | HG1  | GLU | 11 | -0.609 | 8.140 | 2.563  |
| ATOM | 159 | HG2  | GLU | 11 | -0.904 | 6.797 | 1.696  |
| ATOM | 160 | CD   | GLU | 11 | -2.544 | 8.052 | 1.721  |
| ATOM | 161 | OE1  | GLU | 11 | -3.051 | 8.994 | 2.222  |
| ATOM | 162 | OE2  | GLU | 11 | -3.341 | 7.214 | 1.414  |
| ATOM | 163 | C    | GLU | 11 | -1.823 | 8.095 | -1.422 |
| ATOM | 164 | O    | GLU | 11 | -1.916 | 9.207 | -1.881 |
| ATOM | 165 | N    | VAL | 12 | -2.929 | 7.271 | -1.582 |
| ATOM | 166 | HN   | VAL | 12 | -2.973 | 6.326 | -1.179 |
| ATOM | 167 | CA   | VAL | 12 | -4.054 | 7.728 | -2.284 |
| ATOM | 168 | HA   | VAL | 12 | -4.227 | 8.717 | -1.966 |
| ATOM | 169 | CB   | VAL | 12 | -3.947 | 7.664 | -3.832 |
| ATOM | 170 | HB   | VAL | 12 | -3.094 | 8.210 | -4.127 |
| ATOM | 171 | CG1  | VAL | 12 | -3.679 | 6.298 | -4.354 |
| ATOM | 172 | HG11 | VAL | 12 | -2.883 | 5.833 | -3.880 |
| ATOM | 173 | HG12 | VAL | 12 | -4.417 | 5.734 | -4.188 |
| ATOM | 174 | HG13 | VAL | 12 | -3.527 | 6.275 | -5.335 |
| ATOM | 175 | CG2  | VAL | 12 | -5.257 | 8.210 | -4.571 |
| ATOM | 176 | HG21 | VAL | 12 | -5.405 | 9.184 | -4.283 |
| ATOM | 177 | HG22 | VAL | 12 | -5.151 | 8.156 | -5.545 |
| ATOM | 178 | HG23 | VAL | 12 | -5.995 | 7.706 | -4.319 |
| ATOM | 179 | C    | VAL | 12 | -5.141 | 6.947 | -1.748 |
| ATOM | 180 | O    | VAL | 12 | -4.853 | 5.818 | -1.261 |
| ATOM | 181 | N    | HIS | 13 | -6.393 | 7.365 | -1.776 |
| ATOM | 182 | HN   | HIS | 13 | -6.560 | 8.220 | -2.212 |
| ATOM | 183 | CA   | HIS | 13 | -7.392 | 6.522 | -1.207 |
| ATOM | 184 | HA   | HIS | 13 | -6.974 | 6.196 | -0.346 |
| ATOM | 185 | CB   | HIS | 13 | -8.647 | 7.268 | -0.927 |
| ATOM | 186 | HB1  | HIS | 13 | -9.328 | 6.684 | -0.481 |
| ATOM | 187 | HB2  | HIS | 13 | -9.087 | 7.488 | -1.771 |
| ATOM | 188 | CG   | HIS | 13 | -8.417 | 8.458 | -0.003 |
| ATOM | 189 | ND1  | HIS | 13 | -7.908 | 8.406 | 1.203  |
| ATOM | 190 | HD1  | HIS | 13 | -7.675 | 7.493 | 1.572  |
| ATOM | 191 | CE1  | HIS | 13 | -7.816 | 9.635 | 1.776  |

|      |     |         |     |        |         |        |        |
|------|-----|---------|-----|--------|---------|--------|--------|
| ATOM | 192 | HE1     | HIS | 13     | -7.455  | 9.949  | 2.667  |
| ATOM | 193 | NE2     | HIS | 13     | -8.292  | 10.502 | 0.884  |
| ATOM | 194 | CD2     | HIS | 13     | -8.681  | 9.848  | -0.223 |
| ATOM | 195 | HD2     | HIS | 13     | -9.107  | 10.177 | -1.072 |
| ATOM | 196 | C       | HIS | 13     | -7.853  | 5.462  | -2.063 |
| ATOM | 197 | O       | HIS | 13     | -9.049  | 5.346  | -2.298 |
| ATOM | 198 | N       | HIS | 14     | -6.979  | 4.635  | -2.723 |
| ATOM | 199 | HN      | HIS | 14     | -6.006  | 4.798  | -2.551 |
| ATOM | 200 | CA      | HIS | 14     | -7.348  | 3.601  | -3.615 |
| ATOM | 201 | HA      | HIS | 14     | -8.246  | 3.187  | -3.505 |
| ATOM | 202 | CB      | HIS | 14     | -7.084  | 3.777  | -5.117 |
| ATOM | 203 | HB1     | HIS | 14     | -7.305  | 2.894  | -5.649 |
| ATOM | 204 | HB2     | HIS | 14     | -6.146  | 3.988  | -5.197 |
| ATOM | 205 | CG      | HIS | 14     | -8.035  | 4.842  | -5.577 |
| ATOM | 206 | ND1     | HIS | 14     | -9.354  | 4.921  | -5.453 |
| ATOM | 207 | HD1     | HIS | 14     | -10.092 | 4.389  | -5.055 |
| ATOM | 208 | CE1     | HIS | 14     | -9.698  | 6.075  | -6.007 |
| ATOM | 209 | HE1     | HIS | 14     | -10.662 | 6.410  | -6.031 |
| ATOM | 210 | NE2     | HIS | 14     | -8.680  | 6.751  | -6.557 |
| ATOM | 211 | CD2     | HIS | 14     | -7.579  | 6.011  | -6.243 |
| ATOM | 212 | HD2     | HIS | 14     | -6.675  | 6.292  | -6.508 |
| ATOM | 213 | C       | HIS | 14     | -6.316  | 2.684  | -3.087 |
| ATOM | 214 | O       | HIS | 14     | -5.157  | 3.075  | -3.157 |
| ATOM | 215 | N       | GLN | 15     | -6.613  | 1.558  | -2.492 |
| ATOM | 216 | HN      | GLN | 15     | -7.536  | 1.305  | -2.474 |
| ATOM | 217 | CA      | GLN | 15     | -5.538  | 0.823  | -1.908 |
| ATOM | 218 | HA      | GLN | 15     | -4.953  | 1.564  | -1.603 |
| ATOM | 219 | CB      | GLN | 15     | -5.820  | -0.014 | -0.660 |
| ATOM | 220 | HB1     | GLN | 15     | -4.961  | -0.357 | -0.259 |
| ATOM | 221 | HB2     | GLN | 15     | -6.413  | -0.755 | -0.893 |
| ATOM | 222 | CG      | GLN | 15     | -6.570  | 0.863  | 0.366  |
| ATOM | 223 | HG1     | GLN | 15     | -6.812  | 0.284  | 1.193  |
| ATOM | 224 | HG2     | GLN | 15     | -7.472  | 1.306  | 0.053  |
| ATOM | 225 | CD      | GLN | 15     | -5.694  | 1.997  | 0.777  |
| ATOM | 226 | OE1     | GLN | 15     | -6.130  | 3.116  | 0.546  |
| ATOM | 227 | NE2     | GLN | 15     | -4.496  | 1.763  | 1.334  |
| ATOM | 228 | HE21GLN | 15  | -3.913 | 2.498   | 1.571  |        |
| ATOM | 229 | HE22GLN | 15  | -4.185 | 0.828   | 1.484  |        |
| ATOM | 230 | C       | GLN | 15     | -4.829  | -0.074 | -2.898 |
| ATOM | 231 | O       | GLN | 15     | -3.780  | -0.476 | -2.522 |
| ATOM | 232 | N       | LYS | 16     | -5.378  | -0.470 | -4.108 |
| ATOM | 233 | HN      | LYS | 16     | -6.297  | -0.153 | -4.371 |
| ATOM | 234 | CA      | LYS | 16     | -4.611  | -1.320 | -5.003 |
| ATOM | 235 | HA1     | LYS | 16     | -4.209  | -2.099 | -4.592 |
| ATOM | 236 | CB      | LYS | 16     | -5.590  | -1.839 | -6.111 |
| ATOM | 237 | HB1     | LYS | 16     | -5.942  | -1.038 | -6.626 |
| ATOM | 238 | HB2     | LYS | 16     | -6.298  | -2.271 | -5.636 |
| ATOM | 239 | CG      | LYS | 16     | -4.977  | -2.740 | -7.215 |
| ATOM | 240 | HG1     | LYS | 16     | -5.778  | -3.058 | -7.796 |

|      |     |      |     |    |        |        |         |
|------|-----|------|-----|----|--------|--------|---------|
| ATOM | 241 | HG2  | LYS | 16 | -4.600 | -3.572 | -6.750  |
| ATOM | 242 | CD   | LYS | 16 | -3.980 | -2.091 | -8.187  |
| ATOM | 243 | HD1  | LYS | 16 | -3.205 | -1.640 | -7.621  |
| ATOM | 244 | HD2  | LYS | 16 | -4.490 | -1.402 | -8.743  |
| ATOM | 245 | CE   | LYS | 16 | -3.461 | -3.215 | -9.129  |
| ATOM | 246 | HE1  | LYS | 16 | -2.979 | -3.970 | -8.648  |
| ATOM | 247 | HE2  | LYS | 16 | -2.795 | -2.840 | -9.740  |
| ATOM | 248 | NZ   | LYS | 16 | -4.534 | -3.744 | -9.918  |
| ATOM | 249 | HZ1  | LYS | 16 | -5.149 | -4.240 | -9.384  |
| ATOM | 250 | HZ2  | LYS | 16 | -5.011 | -3.058 | -10.455 |
| ATOM | 251 | HZ3  | LYS | 16 | -4.205 | -4.436 | -10.571 |
| ATOM | 252 | C    | LYS | 16 | -3.492 | -0.414 | -5.508  |
| ATOM | 253 | O    | LYS | 16 | -2.319 | -0.776 | -5.699  |
| ATOM | 254 | N    | LEU | 17 | -3.838 | 0.854  | -5.733  |
| ATOM | 255 | HN   | LEU | 17 | -4.736 | 1.191  | -5.645  |
| ATOM | 256 | CA   | LEU | 17 | -2.776 | 1.786  | -6.164  |
| ATOM | 257 | HA   | LEU | 17 | -2.336 | 1.407  | -6.982  |
| ATOM | 258 | CB   | LEU | 17 | -3.091 | 3.255  | -6.437  |
| ATOM | 259 | HB1  | LEU | 17 | -2.215 | 3.720  | -6.558  |
| ATOM | 260 | HB2  | LEU | 17 | -3.546 | 3.671  | -5.635  |
| ATOM | 261 | CG   | LEU | 17 | -4.037 | 3.465  | -7.647  |
| ATOM | 262 | HG   | LEU | 17 | -4.875 | 3.061  | -7.443  |
| ATOM | 263 | CD1  | LEU | 17 | -4.170 | 5.015  | -7.788  |
| ATOM | 264 | HD11 | LEU | 17 | -4.547 | 5.368  | -6.882  |
| ATOM | 265 | HD12 | LEU | 17 | -3.347 | 5.455  | -8.054  |
| ATOM | 266 | HD13 | LEU | 17 | -4.838 | 5.286  | -8.473  |
| ATOM | 267 | CD2  | LEU | 17 | -3.436 | 2.904  | -8.952  |
| ATOM | 268 | HD21 | LEU | 17 | -3.269 | 1.936  | -8.803  |
| ATOM | 269 | HD22 | LEU | 17 | -4.023 | 2.971  | -9.731  |
| ATOM | 270 | HD23 | LEU | 17 | -2.591 | 3.394  | -9.168  |
| ATOM | 271 | C    | LEU | 17 | -1.796 | 1.922  | -5.064  |
| ATOM | 272 | O    | LEU | 17 | -0.646 | 2.128  | -5.416  |
| ATOM | 273 | N    | VAL | 18 | -2.140 | 1.912  | -3.769  |
| ATOM | 274 | HN   | VAL | 18 | -3.049 | 1.755  | -3.493  |
| ATOM | 275 | CA   | VAL | 18 | -1.156 | 2.062  | -2.732  |
| ATOM | 276 | HA   | VAL | 18 | -0.612 | 2.874  | -2.984  |
| ATOM | 277 | CB   | VAL | 18 | -1.781 | 2.390  | -1.399  |
| ATOM | 278 | HB   | VAL | 18 | -2.318 | 1.594  | -1.150  |
| ATOM | 279 | CG1  | VAL | 18 | -0.871 | 2.710  | -0.189  |
| ATOM | 280 | HG11 | VAL | 18 | -0.400 | 3.594  | -0.360  |
| ATOM | 281 | HG12 | VAL | 18 | -1.339 | 2.802  | 0.658   |
| ATOM | 282 | HG13 | VAL | 18 | -0.150 | 2.046  | -0.099  |
| ATOM | 283 | CG2  | VAL | 18 | -2.550 | 3.765  | -1.527  |
| ATOM | 284 | HG21 | VAL | 18 | -1.983 | 4.536  | -1.772  |
| ATOM | 285 | HG22 | VAL | 18 | -3.311 | 3.683  | -2.186  |
| ATOM | 286 | HG23 | VAL | 18 | -2.970 | 3.960  | -0.597  |
| ATOM | 287 | C    | VAL | 18 | -0.303 | 0.810  | -2.656  |
| ATOM | 288 | O    | VAL | 18 | 0.875  | 0.965  | -2.341  |
| ATOM | 289 | N    | PHE | 19 | -0.788 | -0.385 | -2.949  |

|      |     |      |     |    |        |        |         |
|------|-----|------|-----|----|--------|--------|---------|
| ATOM | 290 | HN   | PHE | 19 | -1.760 | -0.605 | -3.178  |
| ATOM | 291 | CA   | PHE | 19 | 0.094  | -1.533 | -2.911  |
| ATOM | 292 | HA   | PHE | 19 | 0.548  | -1.444 | -2.003  |
| ATOM | 293 | CB   | PHE | 19 | -0.537 | -2.923 | -2.947  |
| ATOM | 294 | HC1  | PHE | 19 | 0.199  | -3.647 | -2.881  |
| ATOM | 295 | HC2  | PHE | 19 | -1.074 | -3.046 | -3.763  |
| ATOM | 296 | CG   | PHE | 19 | -1.555 | -2.909 | -1.794  |
| ATOM | 297 | CD1  | PHE | 19 | -1.249 | -2.319 | -0.533  |
| ATOM | 298 | HCD1 | PHE | 19 | -0.355 | -1.860 | -0.376  |
| ATOM | 299 | CE1  | PHE | 19 | -2.257 | -2.444 | 0.540   |
| ATOM | 300 | HCE1 | PHE | 19 | -2.114 | -2.094 | 1.444   |
| ATOM | 301 | CZ   | PHE | 19 | -3.563 | -3.091 | 0.332   |
| ATOM | 302 | HCZ  | PHE | 19 | -4.275 | -3.183 | 1.046   |
| ATOM | 303 | CE2  | PHE | 19 | -3.905 | -3.659 | -0.979  |
| ATOM | 304 | HCE2 | PHE | 19 | -4.801 | -4.082 | -1.116  |
| ATOM | 305 | CD2  | PHE | 19 | -2.881 | -3.548 | -1.996  |
| ATOM | 306 | HCD2 | PHE | 19 | -3.096 | -3.986 | -2.916  |
| ATOM | 307 | C    | PHE | 19 | 1.048  | -1.496 | -4.030  |
| ATOM | 308 | O    | PHE | 19 | 2.159  | -1.922 | -3.907  |
| ATOM | 309 | N    | PHE | 20 | 0.623  | -0.980 | -5.207  |
| ATOM | 310 | HN   | PHE | 20 | -0.312 | -0.675 | -5.345  |
| ATOM | 311 | CA   | PHE | 20 | 1.603  | -0.944 | -6.246  |
| ATOM | 312 | HA   | PHE | 20 | 2.204  | -1.716 | -6.433  |
| ATOM | 313 | CB   | PHE | 20 | 0.680  | -0.699 | -7.507  |
| ATOM | 314 | HC1  | PHE | 20 | 0.108  | 0.124  | -7.347  |
| ATOM | 315 | HC2  | PHE | 20 | 0.120  | -1.464 | -7.672  |
| ATOM | 316 | CG   | PHE | 20 | 1.573  | -0.527 | -8.677  |
| ATOM | 317 | CD1  | PHE | 20 | 2.101  | -1.656 | -9.279  |
| ATOM | 318 | HCD1 | PHE | 20 | 1.900  | -2.567 | -8.972  |
| ATOM | 319 | CE1  | PHE | 20 | 2.939  | -1.553 | -10.465 |
| ATOM | 320 | HCE1 | PHE | 20 | 3.321  | -2.383 | -10.897 |
| ATOM | 321 | CZ   | PHE | 20 | 3.282  | -0.256 | -11.055 |
| ATOM | 322 | HCZ  | PHE | 20 | 3.893  | -0.176 | -11.812 |
| ATOM | 323 | CE2  | PHE | 20 | 2.708  | 0.952  | -10.371 |
| ATOM | 324 | HCE2 | PHE | 20 | 2.881  | 1.900  | -10.634 |
| ATOM | 325 | CD2  | PHE | 20 | 1.899  | 0.811  | -9.223  |
| ATOM | 326 | HCD2 | PHE | 20 | 1.511  | 1.591  | -8.725  |
| ATOM | 327 | C    | PHE | 20 | 2.544  | 0.227  | -5.942  |
| ATOM | 328 | O    | PHE | 20 | 3.735  | 0.051  | -6.152  |
| ATOM | 329 | N    | ALA | 21 | 2.113  | 1.400  | -5.367  |
| ATOM | 330 | HN   | ALA | 21 | 1.196  | 1.685  | -5.120  |
| ATOM | 331 | CA   | ALA | 21 | 3.131  | 2.362  | -5.136  |
| ATOM | 332 | HA   | ALA | 21 | 3.714  | 2.314  | -5.963  |
| ATOM | 333 | CB   | ALA | 21 | 2.738  | 3.864  | -4.843  |
| ATOM | 334 | HB1  | ALA | 21 | 3.575  | 4.418  | -4.843  |
| ATOM | 335 | HB2  | ALA | 21 | 2.226  | 4.248  | -5.589  |
| ATOM | 336 | HB3  | ALA | 21 | 2.203  | 4.004  | -4.052  |
| ATOM | 337 | C    | ALA | 21 | 3.995  | 1.886  | -3.961  |
| ATOM | 338 | O    | ALA | 21 | 5.165  | 2.320  | -4.024  |

|      |     |         |     |       |        |        |        |
|------|-----|---------|-----|-------|--------|--------|--------|
| ATOM | 339 | N       | GLU | 22    | 3.560  | 1.199  | -2.937 |
| ATOM | 340 | HN      | GLU | 22    | 2.668  | 0.834  | -2.808 |
| ATOM | 341 | CA      | GLU | 22    | 4.617  | 0.934  | -2.004 |
| ATOM | 342 | HA      | GLU | 22    | 5.254  | 1.711  | -2.045 |
| ATOM | 343 | CB      | GLU | 22    | 4.141  | 0.806  | -0.543 |
| ATOM | 344 | HB1     | GLU | 22    | 4.909  | 0.689  | -0.017 |
| ATOM | 345 | HB2     | GLU | 22    | 3.517  | 0.030  | -0.468 |
| ATOM | 346 | CG      | GLU | 22    | 3.457  | 2.093  | -0.276 |
| ATOM | 347 | HG1     | GLU | 22    | 2.702  | 2.165  | -0.939 |
| ATOM | 348 | HG2     | GLU | 22    | 4.114  | 2.799  | -0.431 |
| ATOM | 349 | CD      | GLU | 22    | 2.917  | 2.194  | 1.115  |
| ATOM | 350 | OE1     | GLU | 22    | 2.447  | 3.257  | 1.500  |
| ATOM | 351 | OE2     | GLU | 22    | 3.025  | 1.293  | 1.939  |
| ATOM | 352 | C       | GLU | 22    | 5.348  | -0.329 | -2.486 |
| ATOM | 353 | O       | GLU | 22    | 6.455  | -0.597 | -2.006 |
| ATOM | 354 | N       | ASP | 23    | 4.907  | -1.200 | -3.461 |
| ATOM | 355 | HN      | ASP | 23    | 3.967  | -1.034 | -3.957 |
| ATOM | 356 | CA      | ASP | 23    | 5.749  | -2.281 | -3.896 |
| ATOM | 357 | HA      | ASP | 23    | 6.118  | -2.756 | -3.129 |
| ATOM | 358 | CB      | ASP | 23    | 4.885  | -3.353 | -4.633 |
| ATOM | 359 | HB1     | ASP | 23    | 4.450  | -2.948 | -5.407 |
| ATOM | 360 | HB2     | ASP | 23    | 4.195  | -3.799 | -4.072 |
| ATOM | 361 | CG      | ASP | 23    | 5.884  | -4.376 | -5.030 |
| ATOM | 362 | OD1     | ASP | 23    | 5.976  | -4.749 | -6.207 |
| ATOM | 363 | OD2     | ASP | 23    | 6.609  | -4.904 | -4.231 |
| ATOM | 364 | C       | ASP | 23    | 6.790  | -1.726 | -4.846 |
| ATOM | 365 | O       | ASP | 23    | 7.993  | -2.083 | -4.649 |
| ATOM | 366 | N       | VAL | 24    | 6.531  | -0.805 | -5.780 |
| ATOM | 367 | HN      | VAL | 24    | 5.600  | -0.403 | -5.861 |
| ATOM | 368 | CA      | VAL | 24    | 7.651  | -0.308 | -6.546 |
| ATOM | 369 | HA      | VAL | 24    | 8.216  | -1.051 | -6.921 |
| ATOM | 370 | CB      | VAL | 24    | 7.047  | 0.453  | -7.709 |
| ATOM | 371 | HB      | VAL | 24    | 6.659  | 1.303  | -7.331 |
| ATOM | 372 | CG1     | VAL | 24    | 8.021  | 0.831  | -8.819 |
| ATOM | 373 | HG11VAL | 24  | 8.752 | 1.430  | -8.400 |        |
| ATOM | 374 | HG12VAL | 24  | 8.308 | -0.034 | -9.172 |        |
| ATOM | 375 | HG13VAL | 24  | 7.599 | 1.392  | -9.537 |        |
| ATOM | 376 | CG2     | VAL | 24    | 6.002  | -0.549 | -8.340 |
| ATOM | 377 | HG21VAL | 24  | 5.447 | -0.066 | -9.041 |        |
| ATOM | 378 | HG22VAL | 24  | 6.410 | -1.329 | -8.852 |        |
| ATOM | 379 | HG23VAL | 24  | 5.386 | -0.843 | -7.543 |        |
| ATOM | 380 | C       | VAL | 24    | 8.469  | 0.571  | -5.659 |
| ATOM | 381 | O       | VAL | 24    | 9.663  | 0.464  | -5.841 |
| ATOM | 382 | N       | GLY | 25    | 8.024  | 1.347  | -4.698 |
| ATOM | 383 | HN      | GLY | 25    | 7.041  | 1.419  | -4.464 |
| ATOM | 384 | CA      | GLY | 25    | 8.908  | 2.128  | -3.907 |
| ATOM | 385 | HA1     | GLY | 25    | 8.348  | 2.736  | -3.340 |
| ATOM | 386 | HA2     | GLY | 25    | 9.465  | 2.600  | -4.469 |
| ATOM | 387 | C       | GLY | 25    | 9.720  | 1.186  | -3.063 |

|      |     |      |     |    |        |        |         |
|------|-----|------|-----|----|--------|--------|---------|
| ATOM | 388 | O    | GLY | 25 | 10.888 | 1.463  | -2.958  |
| ATOM | 389 | N    | SER | 26 | 9.250  | 0.065  | -2.505  |
| ATOM | 390 | HN   | SER | 26 | 8.326  | -0.360 | -2.526  |
| ATOM | 391 | CA   | SER | 26 | 10.156 | -0.758 | -1.799  |
| ATOM | 392 | HA   | SER | 26 | 10.682 | -0.200 | -1.199  |
| ATOM | 393 | CB   | SER | 26 | 9.414  | -1.754 | -0.946  |
| ATOM | 394 | HB1  | SER | 26 | 8.948  | -1.320 | -0.193  |
| ATOM | 395 | HB2  | SER | 26 | 10.081 | -2.433 | -0.626  |
| ATOM | 396 | OG   | SER | 26 | 8.539  | -2.471 | -1.761  |
| ATOM | 397 | HG   | SER | 26 | 7.640  | -2.058 | -1.682  |
| ATOM | 398 | C    | SER | 26 | 11.171 | -1.447 | -2.705  |
| ATOM | 399 | O    | SER | 26 | 12.323 | -1.556 | -2.327  |
| ATOM | 400 | N    | ASN | 27 | 10.905 | -1.927 | -3.938  |
| ATOM | 401 | HN   | ASN | 27 | 9.952  | -1.835 | -4.266  |
| ATOM | 402 | CA   | ASN | 27 | 11.993 | -2.489 | -4.712  |
| ATOM | 403 | HA   | ASN | 27 | 12.582 | -2.995 | -4.052  |
| ATOM | 404 | CB   | ASN | 27 | 11.650 | -3.449 | -5.842  |
| ATOM | 405 | HB1  | ASN | 27 | 12.468 | -3.770 | -6.306  |
| ATOM | 406 | HB2  | ASN | 27 | 11.134 | -2.984 | -6.582  |
| ATOM | 407 | CG   | ASN | 27 | 10.864 | -4.605 | -5.309  |
| ATOM | 408 | OD1  | ASN | 27 | 11.487 | -5.635 | -5.054  |
| ATOM | 409 | ND2  | ASN | 27 | 9.518  | -4.542 | -5.032  |
| ATOM | 410 | HD21 | ASN | 27 | 8.990  | -5.314 | -4.663  |
| ATOM | 411 | HD22 | ASN | 27 | 8.888  | -3.807 | -5.152  |
| ATOM | 412 | C    | ASN | 27 | 12.912 | -1.450 | -5.326  |
| ATOM | 413 | O    | ASN | 27 | 14.065 | -1.735 | -5.484  |
| ATOM | 414 | N    | LYS | 28 | 12.531 | -0.149 | -5.524  |
| ATOM | 415 | HN   | LYS | 28 | 11.599 | 0.201  | -5.385  |
| ATOM | 416 | CA   | LYS | 28 | 13.499 | 0.814  | -5.962  |
| ATOM | 417 | HA1  | LYS | 28 | 14.110 | 0.351  | -6.661  |
| ATOM | 418 | CB   | LYS | 28 | 12.849 | 2.085  | -6.550  |
| ATOM | 419 | HB1  | LYS | 28 | 13.516 | 2.729  | -6.878  |
| ATOM | 420 | HB2  | LYS | 28 | 12.340 | 2.536  | -5.825  |
| ATOM | 421 | CG   | LYS | 28 | 11.949 | 1.701  | -7.850  |
| ATOM | 422 | HG1  | LYS | 28 | 11.564 | 2.604  | -8.212  |
| ATOM | 423 | HG2  | LYS | 28 | 11.158 | 1.061  | -7.583  |
| ATOM | 424 | CD   | LYS | 28 | 13.031 | 1.082  | -8.791  |
| ATOM | 425 | HD1  | LYS | 28 | 13.423 | 0.260  | -8.398  |
| ATOM | 426 | HD2  | LYS | 28 | 13.828 | 1.711  | -8.961  |
| ATOM | 427 | CE   | LYS | 28 | 12.372 | 0.728  | -10.172 |
| ATOM | 428 | HE1  | LYS | 28 | 11.592 | 0.113  | -9.980  |
| ATOM | 429 | HE2  | LYS | 28 | 13.017 | 0.257  | -10.802 |
| ATOM | 430 | NZ   | LYS | 28 | 11.815 | 1.886  | -10.915 |
| ATOM | 431 | HZ1  | LYS | 28 | 12.440 | 2.576  | -11.214 |
| ATOM | 432 | HZ2  | LYS | 28 | 11.364 | 1.610  | -11.757 |
| ATOM | 433 | HZ3  | LYS | 28 | 11.128 | 2.440  | -10.537 |
| ATOM | 434 | C    | LYS | 28 | 14.286 | 1.132  | -4.812  |
| ATOM | 435 | O    | LYS | 28 | 15.477 | 1.399  | -5.075  |
| ATOM | 436 | N    | GLY | 29 | 13.732 | 1.112  | -3.613  |

|      |     |      |     |    |        |        |        |
|------|-----|------|-----|----|--------|--------|--------|
| ATOM | 437 | HN   | GLY | 29 | 12.749 | 0.939  | -3.410 |
| ATOM | 438 | CA   | GLY | 29 | 14.560 | 1.360  | -2.443 |
| ATOM | 439 | HA1  | GLY | 29 | 14.081 | 1.362  | -1.535 |
| ATOM | 440 | HA2  | GLY | 29 | 15.058 | 2.190  | -2.578 |
| ATOM | 441 | C    | GLY | 29 | 15.573 | 0.224  | -2.424 |
| ATOM | 442 | O    | GLY | 29 | 16.743 | 0.536  | -2.179 |
| ATOM | 443 | N    | ALA | 30 | 15.186 | -1.059 | -2.610 |
| ATOM | 444 | HN   | ALA | 30 | 14.242 | -1.291 | -2.802 |
| ATOM | 445 | CA   | ALA | 30 | 16.083 | -2.111 | -2.546 |
| ATOM | 446 | HA   | ALA | 30 | 16.467 | -2.161 | -1.580 |
| ATOM | 447 | CB   | ALA | 30 | 15.259 | -3.395 | -2.892 |
| ATOM | 448 | HB1  | ALA | 30 | 14.483 | -3.475 | -2.288 |
| ATOM | 449 | HB2  | ALA | 30 | 14.939 | -3.399 | -3.828 |
| ATOM | 450 | HB3  | ALA | 30 | 15.822 | -4.143 | -2.846 |
| ATOM | 451 | C    | ALA | 30 | 17.186 | -1.980 | -3.576 |
| ATOM | 452 | O    | ALA | 30 | 18.325 | -2.145 | -3.183 |
| ATOM | 453 | N    | ILE | 31 | 16.900 | -1.670 | -4.851 |
| ATOM | 454 | HN   | ILE | 31 | 15.971 | -1.512 | -5.178 |
| ATOM | 455 | CA   | ILE | 31 | 17.974 | -1.390 | -5.842 |
| ATOM | 456 | HA   | ILE | 31 | 18.559 | -2.194 | -5.968 |
| ATOM | 457 | CB   | ILE | 31 | 17.225 | -1.141 | -7.239 |
| ATOM | 458 | HB   | ILE | 31 | 16.622 | -0.351 | -7.166 |
| ATOM | 459 | CG2  | ILE | 31 | 18.290 | -0.821 | -8.344 |
| ATOM | 460 | HG21 | ILE | 31 | 18.865 | -0.079 | -8.035 |
| ATOM | 461 | HG22 | ILE | 31 | 18.903 | -1.576 | -8.426 |
| ATOM | 462 | HG23 | ILE | 31 | 17.821 | -0.564 | -9.240 |
| ATOM | 463 | CG1  | ILE | 31 | 16.435 | -2.410 | -7.638 |
| ATOM | 464 | HG11 | ILE | 31 | 15.850 | -2.693 | -6.952 |
| ATOM | 465 | HG12 | ILE | 31 | 17.139 | -3.124 | -7.781 |
| ATOM | 466 | CD1  | ILE | 31 | 15.733 | -2.126 | -8.971 |
| ATOM | 467 | HD11 | ILE | 31 | 15.085 | -1.455 | -8.784 |
| ATOM | 468 | HD12 | ILE | 31 | 16.368 | -1.759 | -9.659 |
| ATOM | 469 | HD13 | ILE | 31 | 15.201 | -2.967 | -9.290 |
| ATOM | 470 | C    | ILE | 31 | 18.818 | -0.226 | -5.371 |
| ATOM | 471 | O    | ILE | 31 | 20.034 | -0.351 | -5.667 |
| ATOM | 472 | N    | ILE | 32 | 18.345 | 0.830  | -4.653 |
| ATOM | 473 | HN   | ILE | 32 | 17.338 | 0.855  | -4.448 |
| ATOM | 474 | CA   | ILE | 32 | 19.343 | 1.834  | -4.294 |
| ATOM | 475 | HA   | ILE | 32 | 19.893 | 1.963  | -5.068 |
| ATOM | 476 | CB   | ILE | 32 | 18.709 | 3.199  | -3.924 |
| ATOM | 477 | HB   | ILE | 32 | 18.071 | 3.183  | -3.195 |
| ATOM | 478 | CG2  | ILE | 32 | 19.766 | 4.248  | -3.646 |
| ATOM | 479 | HG21 | ILE | 32 | 19.327 | 5.145  | -3.544 |
| ATOM | 480 | HG22 | ILE | 32 | 20.311 | 3.933  | -2.822 |
| ATOM | 481 | HG23 | ILE | 32 | 20.326 | 4.286  | -4.426 |
| ATOM | 482 | CG1  | ILE | 32 | 17.912 | 3.636  | -5.177 |
| ATOM | 483 | HG11 | ILE | 32 | 17.133 | 2.939  | -5.310 |
| ATOM | 484 | HG12 | ILE | 32 | 18.523 | 3.669  | -5.961 |
| ATOM | 485 | CD1  | ILE | 32 | 17.407 | 5.026  | -4.842 |

|      |     |         |    |        |        |        |
|------|-----|---------|----|--------|--------|--------|
| ATOM | 486 | HD11ILE | 32 | 18.146 | 5.653  | -4.753 |
| ATOM | 487 | HD12ILE | 32 | 16.767 | 5.354  | -5.559 |
| ATOM | 488 | HD13ILE | 32 | 16.869 | 4.955  | -4.040 |
| ATOM | 489 | C ILE   | 32 | 20.117 | 1.264  | -3.154 |
| ATOM | 490 | O ILE   | 32 | 21.353 | 1.445  | -3.137 |
| ATOM | 491 | N GLY   | 33 | 19.632 | 0.464  | -2.244 |
| ATOM | 492 | HN GLY  | 33 | 18.696 | 0.112  | -2.178 |
| ATOM | 493 | CA GLY  | 33 | 20.544 | -0.095 | -1.256 |
| ATOM | 494 | HA1 GLY | 33 | 19.942 | -0.603 | -0.604 |
| ATOM | 495 | HA2 GLY | 33 | 20.965 | 0.664  | -0.789 |
| ATOM | 496 | C GLY   | 33 | 21.538 | -1.128 | -1.937 |
| ATOM | 497 | O GLY   | 33 | 22.641 | -1.257 | -1.451 |
| ATOM | 498 | N LEU   | 34 | 21.153 | -1.799 | -2.989 |
| ATOM | 499 | HN LEU  | 34 | 20.250 | -1.699 | -3.384 |
| ATOM | 500 | CA LEU  | 34 | 22.068 | -2.673 | -3.709 |
| ATOM | 501 | HA LEU  | 34 | 22.402 | -3.352 | -3.051 |
| ATOM | 502 | CB LEU  | 34 | 21.411 | -3.357 | -4.934 |
| ATOM | 503 | HB1 LEU | 34 | 22.105 | -3.863 | -5.433 |
| ATOM | 504 | HB2 LEU | 34 | 21.038 | -2.649 | -5.518 |
| ATOM | 505 | CG LEU  | 34 | 20.333 | -4.392 | -4.487 |
| ATOM | 506 | HG LEU  | 34 | 19.595 | -3.936 | -3.972 |
| ATOM | 507 | CD1 LEU | 34 | 19.675 | -4.996 | -5.746 |
| ATOM | 508 | HD11LEU | 34 | 19.232 | -4.240 | -6.289 |
| ATOM | 509 | HD12LEU | 34 | 20.340 | -5.519 | -6.279 |
| ATOM | 510 | HD13LEU | 34 | 18.954 | -5.616 | -5.473 |
| ATOM | 511 | CD2 LEU | 34 | 20.998 | -5.521 | -3.649 |
| ATOM | 512 | HD21LEU | 34 | 21.401 | -5.134 | -2.816 |
| ATOM | 513 | HD22LEU | 34 | 20.387 | -6.293 | -3.427 |
| ATOM | 514 | HD23LEU | 34 | 21.712 | -5.893 | -4.132 |
| ATOM | 515 | C LEU   | 34 | 23.152 | -1.861 | -4.363 |
| ATOM | 516 | O LEU   | 34 | 24.001 | -2.500 | -5.001 |
| ATOM | 517 | N MET   | 35 | 23.171 | -0.509 | -4.315 |
| ATOM | 518 | HN MET  | 35 | 22.493 | 0.107  | -3.798 |
| ATOM | 519 | CA MET  | 35 | 24.241 | 0.232  | -4.941 |
| ATOM | 520 | HA MET  | 35 | 24.693 | -0.266 | -5.664 |
| ATOM | 521 | CB MET  | 35 | 23.840 | 1.572  | -5.470 |
| ATOM | 522 | HB1 MET | 35 | 24.596 | 2.119  | -5.790 |
| ATOM | 523 | HB2 MET | 35 | 23.374 | 2.074  | -4.706 |
| ATOM | 524 | CG MET  | 35 | 22.778 | 1.474  | -6.637 |
| ATOM | 525 | HG1 MET | 35 | 22.480 | 2.391  | -6.966 |
| ATOM | 526 | HG2 MET | 35 | 21.978 | 0.969  | -6.283 |
| ATOM | 527 | SD MET  | 35 | 23.570 | 0.557  | -7.832 |
| ATOM | 528 | CE MET  | 35 | 24.957 | 1.587  | -8.375 |
| ATOM | 529 | HE1 MET | 35 | 25.667 | 1.656  | -7.619 |
| ATOM | 530 | HE2 MET | 35 | 25.355 | 1.112  | -9.207 |
| ATOM | 531 | HE3 MET | 35 | 24.608 | 2.488  | -8.618 |
| ATOM | 532 | C MET   | 35 | 25.175 | 0.453  | -3.785 |
| ATOM | 533 | O MET   | 35 | 26.336 | 0.808  | -3.987 |
| ATOM | 534 | N VAL   | 36 | 24.746 | 0.413  | -2.489 |



|      |     |         |     |        |        |        |        |
|------|-----|---------|-----|--------|--------|--------|--------|
| ATOM | 535 | HN      | VAL | 36     | 23.785 | 0.167  | -2.153 |
| ATOM | 536 | CA      | VAL | 36     | 25.689 | 0.700  | -1.437 |
| ATOM | 537 | HA      | VAL | 36     | 26.279 | 1.488  | -1.751 |
| ATOM | 538 | CB      | VAL | 36     | 24.761 | 1.044  | -0.342 |
| ATOM | 539 | HB      | VAL | 36     | 24.217 | 0.248  | -0.118 |
| ATOM | 540 | CG1     | VAL | 36     | 25.535 | 1.444  | 0.933  |
| ATOM | 541 | HG11VAL | 36  | 24.911 | 1.624  | 1.660  |        |
| ATOM | 542 | HG12VAL | 36  | 26.142 | 0.669  | 1.135  |        |
| ATOM | 543 | HG13VAL | 36  | 26.104 | 2.223  | 0.767  |        |
| ATOM | 544 | CG2     | VAL | 36     | 23.863 | 2.210  | -0.760 |
| ATOM | 545 | HG21VAL | 36  | 23.131 | 2.349  | -0.037 |        |
| ATOM | 546 | HG22VAL | 36  | 24.419 | 3.024  | -0.807 |        |
| ATOM | 547 | HG23VAL | 36  | 23.442 | 2.071  | -1.657 |        |
| ATOM | 548 | C       | VAL | 36     | 26.509 | -0.575 | -1.175 |
| ATOM | 549 | O       | VAL | 36     | 27.634 | -0.461 | -0.718 |
| ATOM | 550 | N       | GLY | 37     | 26.041 | -1.782 | -1.420 |
| ATOM | 551 | HN      | GLY | 37     | 25.139 | -1.990 | -1.778 |
| ATOM | 552 | CA      | GLY | 37     | 26.938 | -2.844 | -1.122 |
| ATOM | 553 | HA1     | GLY | 37     | 26.709 | -3.357 | -0.351 |
| ATOM | 554 | HA2     | GLY | 37     | 27.863 | -2.556 | -1.072 |
| ATOM | 555 | C       | GLY | 37     | 26.488 | -3.543 | -2.380 |
| ATOM | 556 | O       | GLY | 37     | 25.280 | -3.704 | -2.581 |
| ATOM | 557 | N       | GLY | 38     | 27.432 | -3.825 | -3.289 |
| ATOM | 558 | HN      | GLY | 38     | 28.399 | -3.648 | -3.114 |
| ATOM | 559 | CA      | GLY | 38     | 27.146 | -4.374 | -4.620 |
| ATOM | 560 | HA1     | GLY | 38     | 26.182 | -4.073 | -4.862 |
| ATOM | 561 | HA2     | GLY | 38     | 27.213 | -5.376 | -4.525 |
| ATOM | 562 | C       | GLY | 38     | 28.185 | -3.739 | -5.482 |
| ATOM | 563 | O       | GLY | 38     | 28.593 | -4.304 | -6.503 |
| ATOM | 564 | N       | VAL | 39     | 28.531 | -2.503 | -5.114 |
| ATOM | 565 | HN      | VAL | 39     | 28.156 | -2.015 | -4.359 |
| ATOM | 566 | CA      | VAL | 39     | 29.463 | -1.828 | -5.958 |
| ATOM | 567 | HA      | VAL | 39     | 29.762 | -2.391 | -6.794 |
| ATOM | 568 | CB      | VAL | 39     | 28.935 | -0.443 | -6.380 |
| ATOM | 569 | HB      | VAL | 39     | 28.707 | 0.077  | -5.591 |
| ATOM | 570 | CG1     | VAL | 39     | 29.880 | 0.416  | -7.201 |
| ATOM | 571 | HG11VAL | 39  | 29.492 | 1.251  | -7.370 |        |
| ATOM | 572 | HG12VAL | 39  | 30.675 | 0.567  | -6.625 |        |
| ATOM | 573 | HG13VAL | 39  | 30.127 | -0.015 | -8.090 |        |
| ATOM | 574 | CG2     | VAL | 39     | 27.637 | -0.682 | -7.225 |
| ATOM | 575 | HG21VAL | 39  | 27.306 | 0.133  | -7.632 |        |
| ATOM | 576 | HG22VAL | 39  | 27.897 | -1.231 | -7.948 |        |
| ATOM | 577 | HG23VAL | 39  | 26.961 | -1.117 | -6.610 |        |
| ATOM | 578 | C       | VAL | 39     | 30.456 | -1.672 | -4.898 |
| ATOM | 579 | O       | VAL | 39     | 29.996 | -1.591 | -3.749 |
| ATOM | 580 | N       | VAL | 40     | 31.759 | -1.551 | -5.060 |
| ATOM | 581 | HN      | VAL | 40     | 32.171 | -1.559 | -5.922 |
| ATOM | 582 | CA      | VAL | 40     | 32.644 | -1.342 | -3.979 |
| ATOM | 583 | HA      | VAL | 40     | 32.096 | -1.206 | -3.136 |

|      |     |      |     |    |         |         |         |
|------|-----|------|-----|----|---------|---------|---------|
| ATOM | 584 | CB   | VAL | 40 | 33.613  | -2.545  | -3.870  |
| ATOM | 585 | HB   | VAL | 40 | 34.119  | -2.580  | -4.753  |
| ATOM | 586 | CG1  | VAL | 40 | 34.655  | -2.487  | -2.744  |
| ATOM | 587 | HG11 | VAL | 40 | 34.130  | -2.507  | -1.874  |
| ATOM | 588 | HG12 | VAL | 40 | 35.344  | -3.223  | -2.819  |
| ATOM | 589 | HG13 | VAL | 40 | 35.179  | -1.638  | -2.770  |
| ATOM | 590 | CG2  | VAL | 40 | 32.793  | -3.874  | -3.685  |
| ATOM | 591 | HG21 | VAL | 40 | 32.295  | -3.873  | -2.781  |
| ATOM | 592 | HG22 | VAL | 40 | 32.126  | -3.983  | -4.417  |
| ATOM | 593 | HG23 | VAL | 40 | 33.365  | -4.747  | -3.670  |
| ATOM | 594 | C    | VAL | 40 | 33.341  | -0.080  | -4.518  |
| ATOM | 595 | O    | VAL | 40 | 33.158  | 0.076   | -5.726  |
| ATOM | 596 | NA   | NA  | 41 | 1.045   | -9.022  | -26.455 |
| ATOM | 597 | NA   | NA  | 42 | -10.298 | 0.872   | -22.376 |
| ATOM | 598 | NA   | NA  | 43 | 20.230  | -10.218 | -25.353 |

### Initial MD structure of the tenth NMR isoform with 3 Na<sup>+</sup> counterions

|      |    |     |     |   |        |        |         |
|------|----|-----|-----|---|--------|--------|---------|
| ATOM | 1  | N   | ASP | 1 | 3.371  | 23.286 | -9.276  |
| ATOM | 2  | HN  | ASP | 1 | 4.191  | 23.764 | -9.582  |
| ATOM | 3  | CA  | ASP | 1 | 2.601  | 23.796 | -8.105  |
| ATOM | 4  | HA  | ASP | 1 | 3.221  | 24.247 | -7.463  |
| ATOM | 5  | CB  | ASP | 1 | 1.543  | 24.826 | -8.602  |
| ATOM | 6  | HB1 | ASP | 1 | 2.001  | 25.405 | -9.277  |
| ATOM | 7  | HB2 | ASP | 1 | 1.143  | 25.244 | -7.786  |
| ATOM | 8  | CG  | ASP | 1 | 0.393  | 24.111 | -9.340  |
| ATOM | 9  | OD1 | ASP | 1 | 0.642  | 23.698 | -10.461 |
| ATOM | 10 | OD2 | ASP | 1 | -0.667 | 24.012 | -8.740  |
| ATOM | 11 | C   | ASP | 1 | 1.913  | 22.625 | -7.380  |
| ATOM | 12 | O   | ASP | 1 | 2.302  | 21.483 | -7.539  |
| ATOM | 13 | N   | ALA | 2 | 0.909  | 22.952 | -6.603  |
| ATOM | 14 | HN  | ALA | 2 | 0.649  | 23.913 | -6.526  |
| ATOM | 15 | CA  | ALA | 2 | 0.143  | 21.931 | -5.837  |
| ATOM | 16 | HA  | ALA | 2 | 0.306  | 21.026 | -6.232  |
| ATOM | 17 | CB  | ALA | 2 | 0.595  | 21.930 | -4.373  |
| ATOM | 18 | HB1 | ALA | 2 | 0.464  | 22.845 | -3.992  |
| ATOM | 19 | HB2 | ALA | 2 | 0.047  | 21.267 | -3.863  |
| ATOM | 20 | HB3 | ALA | 2 | 1.562  | 21.678 | -4.330  |
| ATOM | 21 | C   | ALA | 2 | -1.342 | 22.272 | -5.903  |
| ATOM | 22 | O   | ALA | 2 | -1.727 | 23.407 | -5.699  |
| ATOM | 23 | N   | GLU | 3 | -2.133 | 21.269 | -6.189  |
| ATOM | 24 | HN  | GLU | 3 | -1.740 | 20.366 | -6.349  |
| ATOM | 25 | CA  | GLU | 3 | -3.603 | 21.456 | -6.281  |
| ATOM | 26 | HA  | GLU | 3 | -3.871 | 22.324 | -6.701  |
| ATOM | 27 | CB  | GLU | 3 | -4.155 | 20.314 | -7.163  |
| ATOM | 28 | HB1 | GLU | 3 | -4.199 | 19.497 | -6.588  |
| ATOM | 29 | HB2 | GLU | 3 | -3.603 | 20.297 | -7.998  |
| ATOM | 30 | CG  | GLU | 3 | -5.596 | 20.644 | -7.588  |

|      |    |      |     |   |        |        |        |
|------|----|------|-----|---|--------|--------|--------|
| ATOM | 31 | HG1  | GLU | 3 | -5.547 | 21.440 | -8.193 |
| ATOM | 32 | HG2  | GLU | 3 | -6.142 | 20.695 | -6.752 |
| ATOM | 33 | CD   | GLU | 3 | -6.153 | 19.482 | -8.419 |
| ATOM | 34 | OE1  | GLU | 3 | -5.904 | 19.490 | -9.615 |
| ATOM | 35 | OE2  | GLU | 3 | -6.800 | 18.643 | -7.814 |
| ATOM | 36 | C    | GLU | 3 | -4.155 | 21.431 | -4.846 |
| ATOM | 37 | O    | GLU | 3 | -3.958 | 22.396 | -4.133 |
| ATOM | 38 | N    | PHE | 4 | -4.805 | 20.360 | -4.445 |
| ATOM | 39 | HN   | PHE | 4 | -4.927 | 19.594 | -5.074 |
| ATOM | 40 | CA   | PHE | 4 | -5.368 | 20.280 | -3.060 |
| ATOM | 41 | HA   | PHE | 4 | -4.719 | 20.707 | -2.430 |
| ATOM | 42 | CB   | PHE | 4 | -6.728 | 21.027 | -3.023 |
| ATOM | 43 | HCB1 | PHE | 4 | -7.175 | 20.771 | -2.165 |
| ATOM | 44 | HCB2 | PHE | 4 | -7.186 | 20.834 | -3.892 |
| ATOM | 45 | CG   | PHE | 4 | -6.501 | 22.544 | -2.966 |
| ATOM | 46 | CD1  | PHE | 4 | -6.005 | 23.134 | -1.816 |
| ATOM | 47 | HCD1 | PHE | 4 | -5.795 | 22.570 | -1.019 |
| ATOM | 48 | CE1  | PHE | 4 | -5.798 | 24.498 | -1.764 |
| ATOM | 49 | HCE1 | PHE | 4 | -5.442 | 24.916 | -0.930 |
| ATOM | 50 | CZ   | PHE | 4 | -6.083 | 25.283 | -2.861 |
| ATOM | 51 | HCZ  | PHE | 4 | -5.932 | 26.270 | -2.823 |
| ATOM | 52 | CE2  | PHE | 4 | -6.576 | 24.702 | -4.011 |
| ATOM | 53 | HCE2 | PHE | 4 | -6.784 | 25.269 | -4.806 |
| ATOM | 54 | CD2  | PHE | 4 | -6.783 | 23.339 | -4.064 |
| ATOM | 55 | HCD2 | PHE | 4 | -7.138 | 22.922 | -4.900 |
| ATOM | 56 | C    | PHE | 4 | -5.564 | 18.825 | -2.606 |
| ATOM | 57 | O    | PHE | 4 | -6.617 | 18.241 | -2.792 |
| ATOM | 58 | N    | ARG | 5 | -4.519 | 18.285 | -2.022 |
| ATOM | 59 | HN   | ARG | 5 | -3.695 | 18.838 | -1.916 |
| ATOM | 60 | CA   | ARG | 5 | -4.513 | 16.875 | -1.505 |
| ATOM | 61 | HA   | ARG | 5 | -3.562 | 16.618 | -1.332 |
| ATOM | 62 | CB   | ARG | 5 | -5.359 | 16.838 | -0.197 |
| ATOM | 63 | HB1  | ARG | 5 | -6.237 | 16.420 | -0.435 |
| ATOM | 64 | HB2  | ARG | 5 | -5.342 | 17.763 | 0.185  |
| ATOM | 65 | CG   | ARG | 5 | -4.692 | 15.917 | 0.847  |
| ATOM | 66 | HG1  | ARG | 5 | -4.334 | 15.126 | 0.349  |
| ATOM | 67 | HG2  | ARG | 5 | -5.360 | 15.776 | 1.578  |
| ATOM | 68 | CD   | ARG | 5 | -3.483 | 16.633 | 1.480  |
| ATOM | 69 | HD1  | ARG | 5 | -3.807 | 17.520 | 1.811  |
| ATOM | 70 | HD2  | ARG | 5 | -2.738 | 16.599 | 0.812  |
| ATOM | 71 | NE   | ARG | 5 | -3.044 | 15.850 | 2.674  |
| ATOM | 72 | HE   | ARG | 5 | -3.597 | 15.079 | 2.983  |
| ATOM | 73 | CZ   | ARG | 5 | -1.947 | 16.155 | 3.324  |
| ATOM | 74 | NH1  | ARG | 5 | -1.204 | 17.160 | 2.936  |
| ATOM | 75 | HH11 | ARG | 5 | -0.368 | 17.393 | 3.429  |
| ATOM | 76 | HH12 | ARG | 5 | -1.451 | 17.715 | 2.144  |
| ATOM | 77 | NH2  | ARG | 5 | -1.623 | 15.430 | 4.359  |
| ATOM | 78 | HH21 | ARG | 5 | -0.787 | 15.661 | 4.854  |
| ATOM | 79 | HH22 | ARG | 5 | -2.189 | 14.663 | 4.654  |

|      |     |     |     |   |        |        |        |
|------|-----|-----|-----|---|--------|--------|--------|
| ATOM | 80  | C   | ARG | 5 | -5.038 | 15.840 | -2.513 |
| ATOM | 81  | O   | ARG | 5 | -5.513 | 14.778 | -2.154 |
| ATOM | 82  | N   | HIE | 6 | -4.922 | 16.211 | -3.759 |
| ATOM | 83  | HN  | HIE | 6 | -4.518 | 17.103 | -3.951 |
| ATOM | 84  | CA  | HIE | 6 | -5.362 | 15.375 | -4.901 |
| ATOM | 85  | HA  | HIE | 6 | -5.856 | 14.538 | -4.668 |
| ATOM | 86  | CB  | HIE | 6 | -6.331 | 16.244 | -5.743 |
| ATOM | 87  | HB1 | HIE | 6 | -5.789 | 17.000 | -6.113 |
| ATOM | 88  | HB2 | HIE | 6 | -7.116 | 16.446 | -5.156 |
| ATOM | 89  | CG  | HIE | 6 | -6.881 | 15.469 | -6.952 |
| ATOM | 90  | ND1 | HIE | 6 | -7.733 | 15.945 | -7.803 |
| ATOM | 91  | HE2 | HIE | 6 | -7.359 | 13.106 | -9.040 |
| ATOM | 92  | CE1 | HIE | 6 | -7.997 | 15.054 | -8.706 |
| ATOM | 93  | HE1 | HIE | 6 | -8.627 | 15.198 | -9.467 |
| ATOM | 94  | NE2 | HIE | 6 | -7.336 | 13.943 | -8.498 |
| ATOM | 95  | CD2 | HIE | 6 | -6.635 | 14.182 | -7.409 |
| ATOM | 96  | HD2 | HIE | 6 | -6.014 | 13.531 | -6.974 |
| ATOM | 97  | C   | HIE | 6 | -4.072 | 15.000 | -5.618 |
| ATOM | 98  | O   | HIE | 6 | -3.248 | 14.296 | -5.071 |
| ATOM | 99  | N   | ASP | 7 | -3.931 | 15.487 | -6.813 |
| ATOM | 100 | HN  | ASP | 7 | -4.662 | 16.060 | -7.187 |
| ATOM | 101 | CA  | ASP | 7 | -2.729 | 15.229 | -7.654 |
| ATOM | 102 | HA  | ASP | 7 | -2.453 | 14.271 | -7.585 |
| ATOM | 103 | CB  | ASP | 7 | -3.099 | 15.570 | -9.112 |
| ATOM | 104 | HB1 | ASP | 7 | -3.643 | 14.804 | -9.456 |
| ATOM | 105 | HB2 | ASP | 7 | -2.247 | 15.814 | -9.575 |
| ATOM | 106 | CG  | ASP | 7 | -4.006 | 16.812 | -9.167 |
| ATOM | 107 | OD1 | ASP | 7 | -3.454 | 17.892 | -9.037 |
| ATOM | 108 | OD2 | ASP | 7 | -5.200 | 16.610 | -9.331 |
| ATOM | 109 | C   | ASP | 7 | -1.529 | 16.075 | -7.171 |
| ATOM | 110 | O   | ASP | 7 | -0.697 | 16.508 | -7.945 |
| ATOM | 111 | N   | SER | 8 | -1.490 | 16.284 | -5.878 |
| ATOM | 112 | HN  | SER | 8 | -2.214 | 15.895 | -5.314 |
| ATOM | 113 | CA  | SER | 8 | -0.417 | 17.073 | -5.215 |
| ATOM | 114 | HA  | SER | 8 | 0.473  | 16.812 | -5.589 |
| ATOM | 115 | CB  | SER | 8 | -0.685 | 18.563 | -5.477 |
| ATOM | 116 | HB1 | SER | 8 | -0.687 | 18.707 | -6.468 |
| ATOM | 117 | HB2 | SER | 8 | -0.059 | 19.095 | -4.905 |
| ATOM | 118 | OG  | SER | 8 | -2.007 | 18.776 | -5.000 |
| ATOM | 119 | HG  | SER | 8 | -2.461 | 19.656 | -5.160 |
| ATOM | 120 | C   | SER | 8 | -0.382 | 16.790 | -3.701 |
| ATOM | 121 | O   | SER | 8 | 0.050  | 17.619 | -2.921 |
| ATOM | 122 | N   | GLY | 9 | -0.841 | 15.621 | -3.326 |
| ATOM | 123 | HN  | GLY | 9 | -1.184 | 14.982 | -4.011 |
| ATOM | 124 | CA  | GLY | 9 | -0.853 | 15.240 | -1.879 |
| ATOM | 125 | HA1 | GLY | 9 | -1.493 | 15.867 | -1.432 |
| ATOM | 126 | HA2 | GLY | 9 | 0.104  | 15.225 | -1.588 |
| ATOM | 127 | C   | GLY | 9 | -1.396 | 13.829 | -1.631 |
| ATOM | 128 | O   | GLY | 9 | -1.142 | 13.250 | -0.593 |

|      |     |      |     |    |        |        |        |
|------|-----|------|-----|----|--------|--------|--------|
| ATOM | 129 | N    | TYR | 10 | -2.129 | 13.311 | -2.587 |
| ATOM | 130 | HN   | TYR | 10 | -2.298 | 13.845 | -3.413 |
| ATOM | 131 | CA   | TYR | 10 | -2.719 | 11.943 | -2.475 |
| ATOM | 132 | HA   | TYR | 10 | -2.995 | 11.716 | -1.541 |
| ATOM | 133 | CB   | TYR | 10 | -3.977 | 11.922 | -3.395 |
| ATOM | 134 | HCB1 | TYR | 10 | -3.644 | 11.670 | -4.304 |
| ATOM | 135 | HCB2 | TYR | 10 | -4.424 | 12.808 | -3.264 |
| ATOM | 136 | CG   | TYR | 10 | -5.036 | 10.861 | -3.024 |
| ATOM | 137 | CD1  | TYR | 10 | -4.757 | 9.733  | -2.263 |
| ATOM | 138 | HCD1 | TYR | 10 | -3.831 | 9.586  | -1.919 |
| ATOM | 139 | CE1  | TYR | 10 | -5.745 | 8.813  | -1.978 |
| ATOM | 140 | HCE1 | TYR | 10 | -5.527 | 8.007  | -1.431 |
| ATOM | 141 | CZ   | TYR | 10 | -7.032 | 8.996  | -2.442 |
| ATOM | 142 | OH   | TYR | 10 | -8.014 | 8.075  | -2.161 |
| ATOM | 143 | HOH  | TYR | 10 | -8.605 | 8.204  | -1.358 |
| ATOM | 144 | CE2  | TYR | 10 | -7.317 | 10.116 | -3.199 |
| ATOM | 145 | HCE2 | TYR | 10 | -8.244 | 10.260 | -3.541 |
| ATOM | 146 | CD2  | TYR | 10 | -6.329 | 11.038 | -3.486 |
| ATOM | 147 | HCD2 | TYR | 10 | -6.551 | 11.843 | -4.035 |
| ATOM | 148 | C    | TYR | 10 | -1.655 | 10.906 | -2.901 |
| ATOM | 149 | O    | TYR | 10 | -0.486 | 11.065 | -2.602 |
| ATOM | 150 | N    | GLU | 11 | -2.091 | 9.877  | -3.585 |
| ATOM | 151 | HN   | GLU | 11 | -3.065 | 9.822  | -3.791 |
| ATOM | 152 | CA   | GLU | 11 | -1.193 | 8.786  | -4.069 |
| ATOM | 153 | HA   | GLU | 11 | -0.377 | 9.158  | -4.512 |
| ATOM | 154 | CB   | GLU | 11 | -0.730 | 7.912  | -2.870 |
| ATOM | 155 | HB1  | GLU | 11 | -1.440 | 7.222  | -2.725 |
| ATOM | 156 | HB2  | GLU | 11 | -0.499 | 8.544  | -2.129 |
| ATOM | 157 | CG   | GLU | 11 | 0.572  | 7.144  | -3.219 |
| ATOM | 158 | HG1  | GLU | 11 | 1.081  | 7.036  | -2.365 |
| ATOM | 159 | HG2  | GLU | 11 | 0.995  | 7.629  | -3.986 |
| ATOM | 160 | CD   | GLU | 11 | 0.239  | 5.725  | -3.718 |
| ATOM | 161 | OE1  | GLU | 11 | 0.025  | 4.879  | -2.862 |
| ATOM | 162 | OE2  | GLU | 11 | 0.216  | 5.560  | -4.928 |
| ATOM | 163 | C    | GLU | 11 | -2.016 | 7.945  | -5.047 |
| ATOM | 164 | O    | GLU | 11 | -1.535 | 7.549  | -6.092 |
| ATOM | 165 | N    | VAL | 12 | -3.247 | 7.704  | -4.657 |
| ATOM | 166 | HN   | VAL | 12 | -3.558 | 8.068  | -3.783 |
| ATOM | 167 | CA   | VAL | 12 | -4.193 | 6.900  | -5.485 |
| ATOM | 168 | HA   | VAL | 12 | -3.849 | 6.901  | -6.425 |
| ATOM | 169 | CB   | VAL | 12 | -4.270 | 5.440  | -4.931 |
| ATOM | 170 | HB   | VAL | 12 | -4.806 | 4.910  | -5.588 |
| ATOM | 171 | CG1  | VAL | 12 | -2.892 | 4.826  | -4.801 |
| ATOM | 172 | HG11 | VAL | 12 | -2.380 | 5.320  | -4.098 |
| ATOM | 173 | HG12 | VAL | 12 | -2.986 | 3.865  | -4.541 |
| ATOM | 174 | HG13 | VAL | 12 | -2.419 | 4.897  | -5.679 |
| ATOM | 175 | CG2  | VAL | 12 | -4.964 | 5.396  | -3.541 |
| ATOM | 176 | HG21 | VAL | 12 | -4.799 | 6.261  | -3.067 |
| ATOM | 177 | HG22 | VAL | 12 | -5.946 | 5.261  | -3.671 |

|      |     |         |    |         |        |        |
|------|-----|---------|----|---------|--------|--------|
| ATOM | 178 | HG23VAL | 12 | -4.584  | 4.639  | -3.010 |
| ATOM | 179 | C VAL   | 12 | -5.602  | 7.500  | -5.475 |
| ATOM | 180 | O VAL   | 12 | -5.829  | 8.627  | -5.088 |
| ATOM | 181 | N HIS   | 13 | -6.479  | 6.653  | -5.937 |
| ATOM | 182 | HN HIS  | 13 | -6.130  | 5.768  | -6.235 |
| ATOM | 183 | CA HIS  | 13 | -7.941  | 6.876  | -6.066 |
| ATOM | 184 | HA HIS  | 13 | -8.317  | 7.479  | -5.362 |
| ATOM | 185 | CB HIS  | 13 | -8.234  | 7.538  | -7.424 |
| ATOM | 186 | HB1 HIS | 13 | -9.228  | 7.605  | -7.512 |
| ATOM | 187 | HB2 HIS | 13 | -7.712  | 7.036  | -8.116 |
| ATOM | 188 | CG HIS  | 13 | -7.683  | 8.968  | -7.388 |
| ATOM | 189 | ND1 HIS | 13 | -6.565  | 9.347  | -7.918 |
| ATOM | 190 | HD1 HIS | 13 | -5.935  | 8.756  | -8.414 |
| ATOM | 191 | CE1 HIS | 13 | -6.389  | 10.614 | -7.704 |
| ATOM | 192 | HE1 HIS | 13 | -5.594  | 11.129 | -8.020 |
| ATOM | 193 | NE2 HIS | 13 | -7.381  | 11.134 | -7.025 |
| ATOM | 194 | CD2 HIS | 13 | -8.200  | 10.121 | -6.818 |
| ATOM | 195 | HD2 HIS | 13 | -9.066  | 10.176 | -6.324 |
| ATOM | 196 | C HIS   | 13 | -8.558  | 5.454  | -5.980 |
| ATOM | 197 | O HIS   | 13 | -9.749  | 5.274  | -6.152 |
| ATOM | 198 | N HIS   | 14 | -7.695  | 4.493  | -5.709 |
| ATOM | 199 | HN HIS  | 14 | -6.741  | 4.748  | -5.580 |
| ATOM | 200 | CA HIS  | 14 | -8.045  | 3.050  | -5.578 |
| ATOM | 201 | HA HIS  | 14 | -8.944  | 2.941  | -5.153 |
| ATOM | 202 | CB HIS  | 14 | -8.069  | 2.411  | -6.974 |
| ATOM | 203 | HB1 HIS | 14 | -8.081  | 1.420  | -6.843 |
| ATOM | 204 | HB2 HIS | 14 | -7.327  | 2.829  | -7.500 |
| ATOM | 205 | CG HIS  | 14 | -9.369  | 2.784  | -7.660 |
| ATOM | 206 | ND1 HIS | 14 | -10.559 | 2.405  | -7.327 |
| ATOM | 207 | HD1 HIS | 14 | -10.782 | 1.804  | -6.564 |
| ATOM | 208 | CE1 HIS | 14 | -11.417 | 2.932  | -8.144 |
| ATOM | 209 | HE1 HIS | 14 | -12.404 | 2.786  | -8.090 |
| ATOM | 210 | NE2 HIS | 14 | -10.832 | 3.679  | -9.049 |
| ATOM | 211 | CD2 HIS | 14 | -9.552  | 3.592  | -8.752 |
| ATOM | 212 | HD2 HIS | 14 | -8.817  | 4.049  | -9.251 |
| ATOM | 213 | C HIS   | 14 | -6.971  | 2.367  | -4.707 |
| ATOM | 214 | O HIS   | 14 | -5.783  | 2.487  | -4.958 |
| ATOM | 215 | N GLN   | 15 | -7.409  | 1.656  | -3.695 |
| ATOM | 216 | HN GLN  | 15 | -8.391  | 1.587  | -3.531 |
| ATOM | 217 | CA GLN  | 15 | -6.449  | 0.949  | -2.784 |
| ATOM | 218 | HA GLN  | 15 | -5.835  | 1.623  | -2.373 |
| ATOM | 219 | CB GLN  | 15 | -7.255  | 0.223  | -1.688 |
| ATOM | 220 | HB1 GLN | 15 | -7.487  | -0.680 | -2.051 |
| ATOM | 221 | HB2 GLN | 15 | -7.988  | 0.843  | -1.407 |
| ATOM | 222 | CG GLN  | 15 | -6.371  | -0.009 | -0.444 |
| ATOM | 223 | HG1 GLN | 15 | -6.367  | 0.847  | 0.076  |
| ATOM | 224 | HG2 GLN | 15 | -5.504  | -0.391 | -0.768 |
| ATOM | 225 | CD GLN  | 15 | -7.024  | -1.073 | 0.444  |
| ATOM | 226 | OE1 GLN | 15 | -6.735  | -2.249 | 0.341  |

|      |     |      |     |    |        |        |         |
|------|-----|------|-----|----|--------|--------|---------|
| ATOM | 227 | NE2  | GLN | 15 | -7.912 | -0.704 | 1.327   |
| ATOM | 228 | HE21 | GLN | 15 | -8.337 | -1.397 | 1.906   |
| ATOM | 229 | HE22 | GLN | 15 | -8.149 | 0.261  | 1.412   |
| ATOM | 230 | C    | GLN | 15 | -5.584 | -0.067 | -3.560  |
| ATOM | 231 | O    | GLN | 15 | -4.591 | -0.570 | -3.069  |
| ATOM | 232 | N    | LYS | 16 | -5.985 | -0.332 | -4.778  |
| ATOM | 233 | HN   | LYS | 16 | -6.799 | 0.125  | -5.127  |
| ATOM | 234 | CA   | LYS | 16 | -5.261 | -1.292 | -5.651  |
| ATOM | 235 | HA1  | LYS | 16 | -5.100 | -2.175 | -5.210  |
| ATOM | 236 | CB   | LYS | 16 | -6.117 | -1.544 | -6.918  |
| ATOM | 237 | HB1  | LYS | 16 | -6.271 | -0.651 | -7.341  |
| ATOM | 238 | HB2  | LYS | 16 | -6.902 | -2.091 | -6.625  |
| ATOM | 239 | CG   | LYS | 16 | -5.351 | -2.396 | -7.958  |
| ATOM | 240 | HG1  | LYS | 16 | -4.561 | -1.856 | -8.253  |
| ATOM | 241 | HG2  | LYS | 16 | -6.022 | -2.696 | -8.637  |
| ATOM | 242 | CD   | LYS | 16 | -4.797 | -3.666 | -7.283  |
| ATOM | 243 | HD1  | LYS | 16 | -5.548 | -4.064 | -6.754  |
| ATOM | 244 | HD2  | LYS | 16 | -3.954 | -3.398 | -6.814  |
| ATOM | 245 | CE   | LYS | 16 | -4.405 | -4.707 | -8.346  |
| ATOM | 246 | HE1  | LYS | 16 | -3.962 | -5.461 | -7.861  |
| ATOM | 247 | HE2  | LYS | 16 | -3.901 | -4.215 | -9.057  |
| ATOM | 248 | NZ   | LYS | 16 | -5.624 | -5.272 | -8.994  |
| ATOM | 249 | HZ1  | LYS | 16 | -6.428 | -4.794 | -8.646  |
| ATOM | 250 | HZ2  | LYS | 16 | -5.555 | -5.147 | -9.981  |
| ATOM | 251 | HZ3  | LYS | 16 | -5.686 | -6.244 | -8.777  |
| ATOM | 252 | C    | LYS | 16 | -3.936 | -0.636 | -5.995  |
| ATOM | 253 | O    | LYS | 16 | -2.869 | -1.198 | -5.841  |
| ATOM | 254 | N    | LEU | 17 | -4.073 | 0.578  | -6.452  |
| ATOM | 255 | HN   | LEU | 17 | -4.984 | 0.971  | -6.541  |
| ATOM | 256 | CA   | LEU | 17 | -2.885 | 1.377  | -6.839  |
| ATOM | 257 | HA   | LEU | 17 | -2.361 | 0.943  | -7.572  |
| ATOM | 258 | CB   | LEU | 17 | -3.365 | 2.746  | -7.341  |
| ATOM | 259 | HB1  | LEU | 17 | -2.582 | 3.173  | -7.794  |
| ATOM | 260 | HB2  | LEU | 17 | -3.788 | 3.204  | -6.557  |
| ATOM | 261 | CG   | LEU | 17 | -4.474 | 2.599  | -8.416  |
| ATOM | 262 | HG   | LEU | 17 | -5.268 | 2.157  | -7.999  |
| ATOM | 263 | CD1  | LEU | 17 | -4.839 | 3.999  | -8.935  |
| ATOM | 264 | HD11 | LEU | 17 | -4.798 | 4.649  | -8.176  |
| ATOM | 265 | HD12 | LEU | 17 | -4.186 | 4.264  | -9.645  |
| ATOM | 266 | HD13 | LEU | 17 | -5.764 | 3.975  | -9.314  |
| ATOM | 267 | CD2  | LEU | 17 | -4.009 | 1.718  | -9.594  |
| ATOM | 268 | HD21 | LEU | 17 | -3.144 | 2.075  | -9.946  |
| ATOM | 269 | HD22 | LEU | 17 | -3.883 | 0.780  | -9.270  |
| ATOM | 270 | HD23 | LEU | 17 | -4.705 | 1.740  | -10.312 |
| ATOM | 271 | C    | LEU | 17 | -1.995 | 1.510  | -5.599  |
| ATOM | 272 | O    | LEU | 17 | -0.791 | 1.519  | -5.725  |
| ATOM | 273 | N    | VAL | 18 | -2.588 | 1.608  | -4.429  |
| ATOM | 274 | HN   | VAL | 18 | -3.583 | 1.601  | -4.371  |
| ATOM | 275 | CA   | VAL | 18 | -1.761 | 1.731  | -3.183  |

|      |     |      |     |    |        |        |         |
|------|-----|------|-----|----|--------|--------|---------|
| ATOM | 276 | HA   | VAL | 18 | -1.173 | 2.541  | -3.187  |
| ATOM | 277 | CB   | VAL | 18 | -2.746 | 1.851  | -1.956  |
| ATOM | 278 | HB   | VAL | 18 | -3.612 | 1.454  | -2.257  |
| ATOM | 279 | CG1  | VAL | 18 | -2.271 | 1.082  | -0.705  |
| ATOM | 280 | HG11 | VAL | 18 | -2.216 | 1.716  | 0.066   |
| ATOM | 281 | HG12 | VAL | 18 | -2.925 | 0.354  | -0.502  |
| ATOM | 282 | HG13 | VAL | 18 | -1.369 | 0.689  | -0.886  |
| ATOM | 283 | CG2  | VAL | 18 | -2.881 | 3.329  | -1.551  |
| ATOM | 284 | HG21 | VAL | 18 | -2.735 | 3.411  | -0.565  |
| ATOM | 285 | HG22 | VAL | 18 | -2.195 | 3.866  | -2.043  |
| ATOM | 286 | HG23 | VAL | 18 | -3.798 | 3.649  | -1.788  |
| ATOM | 287 | C    | VAL | 18 | -0.859 | 0.483  | -3.096  |
| ATOM | 288 | O    | VAL | 18 | 0.350  | 0.596  | -3.045  |
| ATOM | 289 | N    | PHE | 19 | -1.469 | -0.678 | -3.095  |
| ATOM | 290 | HN   | PHE | 19 | -2.466 | -0.703 | -3.148  |
| ATOM | 291 | CA   | PHE | 19 | -0.703 | -1.965 | -3.015  |
| ATOM | 292 | HA   | PHE | 19 | -0.303 | -2.077 | -2.105  |
| ATOM | 293 | CB   | PHE | 19 | -1.677 | -3.134 | -3.295  |
| ATOM | 294 | HCB1 | PHE | 19 | -1.133 | -3.877 | -3.686  |
| ATOM | 295 | HCB2 | PHE | 19 | -2.441 | -2.755 | -3.818  |
| ATOM | 296 | CG   | PHE | 19 | -2.255 | -3.654 | -1.969  |
| ATOM | 297 | CD1  | PHE | 19 | -3.050 | -2.842 | -1.178  |
| ATOM | 298 | HCD1 | PHE | 19 | -3.251 | -1.909 | -1.473  |
| ATOM | 299 | CE1  | PHE | 19 | -3.568 | -3.308 | 0.013   |
| ATOM | 300 | HCE1 | PHE | 19 | -4.141 | -2.714 | 0.575   |
| ATOM | 301 | CZ   | PHE | 19 | -3.293 | -4.594 | 0.427   |
| ATOM | 302 | HCZ  | PHE | 19 | -3.667 | -4.933 | 1.289   |
| ATOM | 303 | CE2  | PHE | 19 | -2.502 | -5.412 | -0.352  |
| ATOM | 304 | HCE2 | PHE | 19 | -2.302 | -6.344 | -0.053  |
| ATOM | 305 | CD2  | PHE | 19 | -1.984 | -4.945 | -1.544  |
| ATOM | 306 | HCD2 | PHE | 19 | -1.411 | -5.541 | -2.103  |
| ATOM | 307 | C    | PHE | 19 | 0.437  | -1.956 | -4.039  |
| ATOM | 308 | O    | PHE | 19 | 1.579  | -2.238 | -3.728  |
| ATOM | 309 | N    | PHE | 20 | 0.071  | -1.614 | -5.247  |
| ATOM | 310 | HN   | PHE | 20 | -0.888 | -1.394 | -5.420  |
| ATOM | 311 | CA   | PHE | 20 | 1.046  | -1.544 | -6.366  |
| ATOM | 312 | HA   | PHE | 20 | 1.463  | -2.424 | -6.594  |
| ATOM | 313 | CB   | PHE | 20 | 0.247  | -1.033 | -7.599  |
| ATOM | 314 | HCB1 | PHE | 20 | -0.460 | -0.421 | -7.243  |
| ATOM | 315 | HCB2 | PHE | 20 | -0.021 | -1.845 | -8.118  |
| ATOM | 316 | CG   | PHE | 20 | 1.114  | -0.189 | -8.532  |
| ATOM | 317 | CD1  | PHE | 20 | 2.002  | -0.799 | -9.395  |
| ATOM | 318 | HCD1 | PHE | 20 | 2.075  | -1.795 | -9.412  |
| ATOM | 319 | CE1  | PHE | 20 | 2.789  | -0.039 | -10.233 |
| ATOM | 320 | HCE1 | PHE | 20 | 3.430  | -0.484 | -10.856 |
| ATOM | 321 | CZ   | PHE | 20 | 2.693  | 1.339  | -10.213 |
| ATOM | 322 | HCZ  | PHE | 20 | 3.263  | 1.890  | -10.820 |
| ATOM | 323 | CE2  | PHE | 20 | 1.806  | 1.952  | -9.350  |
| ATOM | 324 | HCE2 | PHE | 20 | 1.734  | 2.948  | -9.332  |



|      |     |      |     |    |       |        |        |
|------|-----|------|-----|----|-------|--------|--------|
| ATOM | 325 | CD2  | PHE | 20 | 1.021 | 1.190  | -8.514 |
| ATOM | 326 | HCD2 | PHE | 20 | 0.381 | 1.636  | -7.891 |
| ATOM | 327 | C    | PHE | 20 | 2.206 | -0.613 | -5.951 |
| ATOM | 328 | O    | PHE | 20 | 3.358 | -0.992 | -6.004 |
| ATOM | 329 | N    | ALA | 21 | 1.865 | 0.582  | -5.535 |
| ATOM | 330 | HN   | ALA | 21 | 0.899 | 0.824  | -5.505 |
| ATOM | 331 | CA   | ALA | 21 | 2.882 | 1.590  | -5.101 |
| ATOM | 332 | HA   | ALA | 21 | 3.422 | 1.869  | -5.895 |
| ATOM | 333 | CB   | ALA | 21 | 2.148 | 2.803  | -4.504 |
| ATOM | 334 | HB1  | ALA | 21 | 2.706 | 3.194  | -3.772 |
| ATOM | 335 | HB2  | ALA | 21 | 2.004 | 3.483  | -5.223 |
| ATOM | 336 | HB3  | ALA | 21 | 1.267 | 2.503  | -4.137 |
| ATOM | 337 | C    | ALA | 21 | 3.850 | 1.007  | -4.073 |
| ATOM | 338 | O    | ALA | 21 | 5.041 | 1.191  | -4.196 |
| ATOM | 339 | N    | GLU | 22 | 3.341 | 0.316  | -3.089 |
| ATOM | 340 | HN   | GLU | 22 | 2.349 | 0.192  | -3.027 |
| ATOM | 341 | CA   | GLU | 22 | 4.242 | -0.288 | -2.052 |
| ATOM | 342 | HA   | GLU | 22 | 4.732 | 0.442  | -1.575 |
| ATOM | 343 | CB   | GLU | 22 | 3.407 | -1.089 | -1.028 |
| ATOM | 344 | HB1  | GLU | 22 | 4.036 | -1.724 | -0.578 |
| ATOM | 345 | HB2  | GLU | 22 | 2.614 | -1.449 | -1.520 |
| ATOM | 346 | CG   | GLU | 22 | 2.864 | -0.151 | 0.069  |
| ATOM | 347 | HG1  | GLU | 22 | 3.522 | 0.597  | 0.164  |
| ATOM | 348 | HG2  | GLU | 22 | 2.652 | -0.722 | 0.863  |
| ATOM | 349 | CD   | GLU | 22 | 1.542 | 0.468  | -0.400 |
| ATOM | 350 | OE1  | GLU | 22 | 0.558 | -0.251 | -0.331 |
| ATOM | 351 | OE2  | GLU | 22 | 1.588 | 1.620  | -0.806 |
| ATOM | 352 | C    | GLU | 22 | 5.246 | -1.228 | -2.735 |
| ATOM | 353 | O    | GLU | 22 | 6.441 | -1.115 | -2.532 |
| ATOM | 354 | N    | ASP | 23 | 4.719 | -2.125 | -3.536 |
| ATOM | 355 | HN   | ASP | 23 | 3.726 | -2.152 | -3.653 |
| ATOM | 356 | CA   | ASP | 23 | 5.575 | -3.108 | -4.277 |
| ATOM | 357 | HA   | ASP | 23 | 5.929 | -3.784 | -3.630 |
| ATOM | 358 | CB   | ASP | 23 | 4.743 | -3.818 | -5.359 |
| ATOM | 359 | HB1  | ASP | 23 | 4.559 | -3.143 | -6.075 |
| ATOM | 360 | HB2  | ASP | 23 | 3.977 | -4.261 | -4.893 |
| ATOM | 361 | CG   | ASP | 23 | 5.586 | -4.933 | -5.997 |
| ATOM | 362 | OD1  | ASP | 23 | 5.721 | -5.961 | -5.354 |
| ATOM | 363 | OD2  | ASP | 23 | 6.056 | -4.691 | -7.099 |
| ATOM | 364 | C    | ASP | 23 | 6.728 | -2.371 | -4.956 |
| ATOM | 365 | O    | ASP | 23 | 7.891 | -2.677 | -4.788 |
| ATOM | 366 | N    | VAL | 24 | 6.309 | -1.394 | -5.710 |
| ATOM | 367 | HN   | VAL | 24 | 5.324 | -1.234 | -5.765 |
| ATOM | 368 | CA   | VAL | 24 | 7.210 | -0.508 | -6.491 |
| ATOM | 369 | HA   | VAL | 24 | 7.722 | -1.005 | -7.191 |
| ATOM | 370 | CB   | VAL | 24 | 6.288 | 0.541  | -7.146 |
| ATOM | 371 | HB   | VAL | 24 | 5.824 | 1.047  | -6.419 |
| ATOM | 372 | CG1  | VAL | 24 | 7.074 | 1.552  | -7.974 |
| ATOM | 373 | HG11 | VAL | 24 | 7.188 | 2.391  | -7.442 |

|      |     |         |    |        |        |         |
|------|-----|---------|----|--------|--------|---------|
| ATOM | 374 | HG12VAL | 24 | 7.969  | 1.165  | -8.197  |
| ATOM | 375 | HG13VAL | 24 | 6.569  | 1.748  | -8.814  |
| ATOM | 376 | CG2 VAL | 24 | 5.248  | -0.179 | -8.034  |
| ATOM | 377 | HG21VAL | 24 | 4.346  | 0.223  | -7.871  |
| ATOM | 378 | HG22VAL | 24 | 5.502  | -0.065 | -8.994  |
| ATOM | 379 | HG23VAL | 24 | 5.234  | -1.151 | -7.799  |
| ATOM | 380 | C VAL   | 24 | 8.273  | 0.116  | -5.585  |
| ATOM | 381 | O VAL   | 24 | 9.455  | 0.015  | -5.843  |
| ATOM | 382 | N GLY   | 25 | 7.804  | 0.741  | -4.540  |
| ATOM | 383 | HN GLY  | 25 | 6.817  | 0.771  | -4.400  |
| ATOM | 384 | CA GLY  | 25 | 8.700  | 1.409  | -3.548  |
| ATOM | 385 | HA1 GLY | 25 | 8.152  | 1.568  | -2.725  |
| ATOM | 386 | HA2 GLY | 25 | 9.121  | 2.186  | -4.016  |
| ATOM | 387 | C GLY   | 25 | 9.834  | 0.469  | -3.146  |
| ATOM | 388 | O GLY   | 25 | 10.995 | 0.827  | -3.189  |
| ATOM | 389 | N SER   | 26 | 9.439  | -0.719 | -2.767  |
| ATOM | 390 | HN SER  | 26 | 8.463  | -0.931 | -2.760  |
| ATOM | 391 | CA SER  | 26 | 10.420 | -1.761 | -2.345  |
| ATOM | 392 | HA SER  | 26 | 10.980 | -1.394 | -1.603  |
| ATOM | 393 | CB SER  | 26 | 9.643  | -3.005 | -1.867  |
| ATOM | 394 | HB1 SER | 26 | 10.286 | -3.607 | -1.392  |
| ATOM | 395 | HB2 SER | 26 | 9.119  | -3.359 | -2.642  |
| ATOM | 396 | OG SER  | 26 | 8.722  | -2.502 | -0.909  |
| ATOM | 397 | HG SER  | 26 | 7.900  | -2.013 | -1.215  |
| ATOM | 398 | C SER   | 26 | 11.365 | -2.147 | -3.494  |
| ATOM | 399 | O SER   | 26 | 12.565 | -1.981 | -3.408  |
| ATOM | 400 | N ASN   | 27 | 10.782 | -2.642 | -4.553  |
| ATOM | 401 | HN ASN  | 27 | 9.788  | -2.735 | -4.553  |
| ATOM | 402 | CA ASN  | 27 | 11.546 | -3.075 | -5.755  |
| ATOM | 403 | HA ASN  | 27 | 12.207 | -3.778 | -5.493  |
| ATOM | 404 | CB ASN  | 27 | 10.522 | -3.623 | -6.767  |
| ATOM | 405 | HB1 ASN | 27 | 11.020 | -3.799 | -7.617  |
| ATOM | 406 | HB2 ASN | 27 | 9.750  | -2.986 | -6.772  |
| ATOM | 407 | CG ASN  | 27 | 9.984  | -4.976 | -6.278  |
| ATOM | 408 | OD1 ASN | 27 | 10.717 | -5.933 | -6.129  |
| ATOM | 409 | ND2 ASN | 27 | 8.711  | -5.096 | -6.018  |
| ATOM | 410 | HD21ASN | 27 | 8.359  | -5.975 | -5.700  |
| ATOM | 411 | HD22ASN | 27 | 8.105  | -4.311 | -6.140  |
| ATOM | 412 | C ASN   | 27 | 12.377 | -1.954 | -6.371  |
| ATOM | 413 | O ASN   | 27 | 13.589 | -1.977 | -6.285  |
| ATOM | 414 | N LYS   | 28 | 11.715 | -1.000 | -6.975  |
| ATOM | 415 | HN LYS  | 28 | 10.718 | -1.046 | -7.009  |
| ATOM | 416 | CA LYS  | 28 | 12.421 | 0.154  | -7.610  |
| ATOM | 417 | HA1 LYS | 28 | 12.926 | -0.140 | -8.422  |
| ATOM | 418 | CB LYS  | 28 | 11.374 | 1.210  | -8.031  |
| ATOM | 419 | HB1 LYS | 28 | 11.589 | 2.049  | -7.533  |
| ATOM | 420 | HB2 LYS | 28 | 10.473 | 0.788  | -7.921  |
| ATOM | 421 | CG LYS  | 28 | 11.540 | 1.522  | -9.527  |
| ATOM | 422 | HG1 LYS | 28 | 11.349 | 0.672  | -10.020 |

|      |     |      |     |    |        |        |         |
|------|-----|------|-----|----|--------|--------|---------|
| ATOM | 423 | HG2  | LYS | 28 | 12.434 | 1.959  | -9.633  |
| ATOM | 424 | CD   | LYS | 28 | 10.483 | 2.552  | -9.988  |
| ATOM | 425 | HD1  | LYS | 28 | 9.624  | 2.304  | -9.539  |
| ATOM | 426 | HD2  | LYS | 28 | 10.524 | 2.577  | -10.988 |
| ATOM | 427 | CE   | LYS | 28 | 10.849 | 3.969  | -9.496  |
| ATOM | 428 | HE1  | LYS | 28 | 10.375 | 4.615  | -10.096 |
| ATOM | 429 | HE2  | LYS | 28 | 11.847 | 4.002  | -9.430  |
| ATOM | 430 | NZ   | LYS | 28 | 10.318 | 4.194  | -8.122  |
| ATOM | 431 | HZ1  | LYS | 28 | 10.572 | 5.110  | -7.821  |
| ATOM | 432 | HZ2  | LYS | 28 | 9.324  | 4.105  | -8.140  |
| ATOM | 433 | HZ3  | LYS | 28 | 10.710 | 3.513  | -7.507  |
| ATOM | 434 | C    | LYS | 28 | 13.405 | 0.744  | -6.592  |
| ATOM | 435 | O    | LYS | 28 | 14.478 | 1.172  | -6.955  |
| ATOM | 436 | N    | GLY | 29 | 13.017 | 0.739  | -5.339  |
| ATOM | 437 | HN   | GLY | 29 | 12.122 | 0.365  | -5.100  |
| ATOM | 438 | CA   | GLY | 29 | 13.901 | 1.283  | -4.268  |
| ATOM | 439 | HA1  | GLY | 29 | 13.462 | 1.073  | -3.393  |
| ATOM | 440 | HA2  | GLY | 29 | 14.094 | 2.235  | -4.506  |
| ATOM | 441 | C    | GLY | 29 | 15.240 | 0.539  | -4.284  |
| ATOM | 442 | O    | GLY | 29 | 16.285 | 1.135  | -4.470  |
| ATOM | 443 | N    | ALA | 30 | 15.173 | -0.759 | -4.100  |
| ATOM | 444 | HN   | ALA | 30 | 14.285 | -1.197 | -3.961  |
| ATOM | 445 | CA   | ALA | 30 | 16.424 | -1.582 | -4.097  |
| ATOM | 446 | HA   | ALA | 30 | 17.016 | -1.287 | -3.347  |
| ATOM | 447 | CB   | ALA | 30 | 16.041 | -3.057 | -3.912  |
| ATOM | 448 | HB1  | ALA | 30 | 15.777 | -3.208 | -2.959  |
| ATOM | 449 | HB2  | ALA | 30 | 15.275 | -3.273 | -4.517  |
| ATOM | 450 | HB3  | ALA | 30 | 16.828 | -3.629 | -4.142  |
| ATOM | 451 | C    | ALA | 30 | 17.193 | -1.400 | -5.408  |
| ATOM | 452 | O    | ALA | 30 | 18.393 | -1.218 | -5.414  |
| ATOM | 453 | N    | ILE | 31 | 16.465 | -1.448 | -6.490  |
| ATOM | 454 | HN   | ILE | 31 | 15.482 | -1.597 | -6.398  |
| ATOM | 455 | CA   | ILE | 31 | 17.041 | -1.289 | -7.853  |
| ATOM | 456 | HA   | ILE | 31 | 17.667 | -2.021 | -8.120  |
| ATOM | 457 | CB   | ILE | 31 | 15.812 | -1.284 | -8.805  |
| ATOM | 458 | HB   | ILE | 31 | 15.092 | -0.716 | -8.408  |
| ATOM | 459 | CG2  | ILE | 31 | 16.121 | -0.652 | -10.172 |
| ATOM | 460 | HG21 | ILE | 31 | 16.254 | 0.333  | -10.053 |
| ATOM | 461 | HG22 | ILE | 31 | 16.953 | -1.065 | -10.542 |
| ATOM | 462 | HG23 | ILE | 31 | 15.353 | -0.819 | -10.790 |
| ATOM | 463 | CG1  | ILE | 31 | 15.327 | -2.753 | -8.958  |
| ATOM | 464 | HG11 | ILE | 31 | 15.085 | -3.068 | -8.040  |
| ATOM | 465 | HG12 | ILE | 31 | 16.037 | -3.236 | -9.471  |
| ATOM | 466 | CD1  | ILE | 31 | 14.040 | -2.845 | -9.803  |
| ATOM | 467 | HD11 | ILE | 31 | 13.411 | -2.122 | -9.518  |
| ATOM | 468 | HD12 | ILE | 31 | 14.275 | -2.731 | -10.768 |
| ATOM | 469 | HD13 | ILE | 31 | 13.618 | -3.740 | -9.658  |
| ATOM | 470 | C    | ILE | 31 | 17.890 | -0.015 | -7.910  |
| ATOM | 471 | O    | ILE | 31 | 19.056 | -0.062 | -8.255  |

|      |     |      |     |    |        |        |         |
|------|-----|------|-----|----|--------|--------|---------|
| ATOM | 472 | N    | ILE | 32 | 17.291 | 1.096  | -7.566  |
| ATOM | 473 | HN   | ILE | 32 | 16.333 | 1.073  | -7.290  |
| ATOM | 474 | CA   | ILE | 32 | 18.024 | 2.394  | -7.580  |
| ATOM | 475 | HA   | ILE | 32 | 18.314 | 2.631  | -8.507  |
| ATOM | 476 | CB   | ILE | 32 | 17.073 | 3.500  | -7.052  |
| ATOM | 477 | HB   | ILE | 32 | 16.752 | 3.258  | -6.136  |
| ATOM | 478 | CG2  | ILE | 32 | 17.823 | 4.855  | -6.981  |
| ATOM | 479 | HG21 | ILE | 32 | 17.565 | 5.326  | -6.137  |
| ATOM | 480 | HG22 | ILE | 32 | 18.808 | 4.683  | -6.988  |
| ATOM | 481 | HG23 | ILE | 32 | 17.569 | 5.410  | -7.773  |
| ATOM | 482 | CG1  | ILE | 32 | 15.877 | 3.626  | -8.033  |
| ATOM | 483 | HG11 | ILE | 32 | 15.601 | 2.695  | -8.274  |
| ATOM | 484 | HG12 | ILE | 32 | 16.164 | 4.256  | -8.756  |
| ATOM | 485 | CD1  | ILE | 32 | 14.670 | 4.276  | -7.330  |
| ATOM | 486 | HD11 | ILE | 32 | 14.999 | 4.989  | -6.711  |
| ATOM | 487 | HD12 | ILE | 32 | 14.067 | 4.676  | -8.020  |
| ATOM | 488 | HD13 | ILE | 32 | 14.179 | 3.575  | -6.813  |
| ATOM | 489 | C    | ILE | 32 | 19.270 | 2.273  | -6.703  |
| ATOM | 490 | O    | ILE | 32 | 20.344 | 2.655  | -7.118  |
| ATOM | 491 | N    | GLY | 33 | 19.099 | 1.739  | -5.521  |
| ATOM | 492 | HN   | GLY | 33 | 18.187 | 1.440  | -5.238  |
| ATOM | 493 | CA   | GLY | 33 | 20.260 | 1.574  | -4.594  |
| ATOM | 494 | HA1  | GLY | 33 | 19.952 | 0.977  | -3.851  |
| ATOM | 495 | HA2  | GLY | 33 | 20.591 | 2.494  | -4.380  |
| ATOM | 496 | C    | GLY | 33 | 21.409 | 0.843  | -5.298  |
| ATOM | 497 | O    | GLY | 33 | 22.540 | 1.289  | -5.286  |
| ATOM | 498 | N    | LEU | 34 | 21.086 | -0.268 | -5.913  |
| ATOM | 499 | HN   | LEU | 34 | 20.138 | -0.584 | -5.896  |
| ATOM | 500 | CA   | LEU | 34 | 22.122 | -1.064 | -6.636  |
| ATOM | 501 | HA   | LEU | 34 | 22.837 | -1.345 | -5.996  |
| ATOM | 502 | CB   | LEU | 34 | 21.444 | -2.314 | -7.247  |
| ATOM | 503 | HB1  | LEU | 34 | 22.166 | -2.848 | -7.688  |
| ATOM | 504 | HB2  | LEU | 34 | 20.674 | -1.984 | -7.794  |
| ATOM | 505 | CG   | LEU | 34 | 20.846 | -3.209 | -6.119  |
| ATOM | 506 | HG   | LEU | 34 | 20.481 | -2.618 | -5.399  |
| ATOM | 507 | CD1  | LEU | 34 | 19.716 | -4.088 | -6.696  |
| ATOM | 508 | HD11 | LEU | 34 | 18.849 | -3.820 | -6.277  |
| ATOM | 509 | HD12 | LEU | 34 | 19.672 | -3.954 | -7.686  |
| ATOM | 510 | HD13 | LEU | 34 | 19.912 | -5.047 | -6.491  |
| ATOM | 511 | CD2  | LEU | 34 | 21.937 | -4.122 | -5.530  |
| ATOM | 512 | HD21 | LEU | 34 | 22.295 | -3.705 | -4.695  |
| ATOM | 513 | HD22 | LEU | 34 | 21.537 | -5.014 | -5.320  |
| ATOM | 514 | HD23 | LEU | 34 | 22.671 | -4.227 | -6.201  |
| ATOM | 515 | C    | LEU | 34 | 22.784 | -0.221 | -7.734  |
| ATOM | 516 | O    | LEU | 34 | 23.997 | -0.173 | -7.823  |
| ATOM | 517 | N    | MET | 35 | 21.968 | 0.424  | -8.535  |
| ATOM | 518 | HN   | MET | 35 | 20.981 | 0.337  | -8.399  |
| ATOM | 519 | CA   | MET | 35 | 22.487 | 1.286  | -9.647  |
| ATOM | 520 | HA   | MET | 35 | 22.961 | 0.717  | -10.319 |

|      |     |      |     |    |        |        |         |
|------|-----|------|-----|----|--------|--------|---------|
| ATOM | 521 | CB   | MET | 35 | 21.297 | 2.004  | -10.316 |
| ATOM | 522 | HB1  | MET | 35 | 21.681 | 2.620  | -11.005 |
| ATOM | 523 | HB2  | MET | 35 | 20.738 | 2.381  | -9.577  |
| ATOM | 524 | CG   | MET | 35 | 20.414 | 0.993  | -11.070 |
| ATOM | 525 | HG1  | MET | 35 | 20.340 | 0.201  | -10.462 |
| ATOM | 526 | HG2  | MET | 35 | 20.842 | 0.885  | -11.968 |
| ATOM | 527 | SD   | MET | 35 | 18.707 | 1.494  | -11.408 |
| ATOM | 528 | CE   | MET | 35 | 18.341 | 0.316  | -12.733 |
| ATOM | 529 | HE1  | MET | 35 | 17.459 | 0.551  | -13.143 |
| ATOM | 530 | HE2  | MET | 35 | 19.062 | 0.368  | -13.423 |
| ATOM | 531 | HE3  | MET | 35 | 18.303 | -0.606 | -12.348 |
| ATOM | 532 | C    | MET | 35 | 23.484 | 2.319  | -9.100  |
| ATOM | 533 | O    | MET | 35 | 24.578 | 2.469  | -9.613  |
| ATOM | 534 | N    | VAL | 36 | 23.050 | 2.991  | -8.064  |
| ATOM | 535 | HN   | VAL | 36 | 22.136 | 2.793  | -7.716  |
| ATOM | 536 | CA   | VAL | 36 | 23.866 | 4.038  | -7.382  |
| ATOM | 537 | HA   | VAL | 36 | 24.057 | 4.807  | -7.993  |
| ATOM | 538 | CB   | VAL | 36 | 23.054 | 4.555  | -6.155  |
| ATOM | 539 | HB   | VAL | 36 | 22.724 | 3.768  | -5.634  |
| ATOM | 540 | CG1  | VAL | 36 | 23.941 | 5.426  | -5.232  |
| ATOM | 541 | HG11 | VAL | 36 | 23.359 | 6.066  | -4.730  |
| ATOM | 542 | HG12 | VAL | 36 | 24.426 | 4.832  | -4.590  |
| ATOM | 543 | HG13 | VAL | 36 | 24.598 | 5.930  | -5.793  |
| ATOM | 544 | CG2  | VAL | 36 | 21.869 | 5.413  | -6.658  |
| ATOM | 545 | HG21 | VAL | 36 | 21.762 | 6.205  | -6.057  |
| ATOM | 546 | HG22 | VAL | 36 | 22.060 | 5.717  | -7.591  |
| ATOM | 547 | HG23 | VAL | 36 | 21.037 | 4.859  | -6.644  |
| ATOM | 548 | C    | VAL | 36 | 25.214 | 3.438  | -6.957  |
| ATOM | 549 | O    | VAL | 36 | 26.249 | 4.013  | -7.236  |
| ATOM | 550 | N    | GLY | 37 | 25.158 | 2.306  | -6.294  |
| ATOM | 551 | HN   | GLY | 37 | 24.269 | 1.896  | -6.094  |
| ATOM | 552 | CA   | GLY | 37 | 26.408 | 1.629  | -5.836  |
| ATOM | 553 | HA1  | GLY | 37 | 26.139 | 0.722  | -5.508  |
| ATOM | 554 | HA2  | GLY | 37 | 26.867 | 2.262  | -5.213  |
| ATOM | 555 | C    | GLY | 37 | 27.360 | 1.405  | -7.017  |
| ATOM | 556 | O    | GLY | 37 | 28.502 | 1.823  | -6.983  |
| ATOM | 557 | N    | GLY | 38 | 26.850 | 0.747  | -8.030  |
| ATOM | 558 | HN   | GLY | 38 | 25.902 | 0.436  | -7.980  |
| ATOM | 559 | CA   | GLY | 38 | 27.653 | 0.453  | -9.258  |
| ATOM | 560 | HA1  | GLY | 38 | 28.340 | 1.177  | -9.335  |
| ATOM | 561 | HA2  | GLY | 38 | 27.000 | 0.314  | -10.003 |
| ATOM | 562 | C    | GLY | 38 | 28.414 | -0.862 | -9.084  |
| ATOM | 563 | O    | GLY | 38 | 28.618 | -1.601 | -10.028 |
| ATOM | 564 | N    | VAL | 39 | 28.808 | -1.096 | -7.857  |
| ATOM | 565 | HN   | VAL | 39 | 28.593 | -0.422 | -7.152  |
| ATOM | 566 | CA   | VAL | 39 | 29.562 | -2.320 | -7.470  |
| ATOM | 567 | HA   | VAL | 39 | 29.676 | -2.951 | -8.238  |
| ATOM | 568 | CB   | VAL | 39 | 30.988 | -1.903 | -6.978  |
| ATOM | 569 | HB   | VAL | 39 | 30.905 | -1.547 | -6.047  |

|      |     |         |     |        |        |        |         |
|------|-----|---------|-----|--------|--------|--------|---------|
| ATOM | 570 | CG1     | VAL | 39     | 31.931 | -3.129 | -6.999  |
| ATOM | 571 | HG11VAL | 39  | 32.561 | -3.069 | -6.225 |         |
| ATOM | 572 | HG12VAL | 39  | 31.383 | -3.963 | -6.929 |         |
| ATOM | 573 | HG13VAL | 39  | 32.445 | -3.130 | -7.857 |         |
| ATOM | 574 | CG2     | VAL | 39     | 31.582 | -0.811 | -7.902  |
| ATOM | 575 | HG21VAL | 39  | 31.670 | 0.041  | -7.385 |         |
| ATOM | 576 | HG22VAL | 39  | 32.481 | -1.109 | -8.223 |         |
| ATOM | 577 | HG23VAL | 39  | 30.970 | -0.675 | -8.681 |         |
| ATOM | 578 | C       | VAL | 39     | 28.759 | -3.000 | -6.348  |
| ATOM | 579 | O       | VAL | 39     | 29.294 | -3.697 | -5.506  |
| ATOM | 580 | N       | VAL | 40     | 27.471 | -2.757 | -6.390  |
| ATOM | 581 | HN      | VAL | 40     | 27.117 | -2.175 | -7.118  |
| ATOM | 582 | CA      | VAL | 40     | 26.517 | -3.320 | -5.391  |
| ATOM | 583 | HA      | VAL | 40     | 26.936 | -4.068 | -4.875  |
| ATOM | 584 | CB      | VAL | 40     | 26.105 | -2.201 | -4.385  |
| ATOM | 585 | HB      | VAL | 40     | 25.559 | -1.520 | -4.873  |
| ATOM | 586 | CG1     | VAL | 40     | 25.281 | -2.813 | -3.231  |
| ATOM | 587 | HG11VAL | 40  | 25.220 | -2.149 | -2.486 |         |
| ATOM | 588 | HG12VAL | 40  | 24.365 | -3.034 | -3.566 |         |
| ATOM | 589 | HG13VAL | 40  | 25.736 | -3.644 | -2.911 |         |
| ATOM | 590 | CG2     | VAL | 40     | 27.362 | -1.522 | -3.792  |
| ATOM | 591 | HG21VAL | 40  | 27.076 | -0.817 | -3.143 |         |
| ATOM | 592 | HG22VAL | 40  | 27.915 | -2.212 | -3.325 |         |
| ATOM | 593 | HG23VAL | 40  | 27.889 | -1.108 | -4.534 |         |
| ATOM | 594 | C       | VAL | 40     | 25.286 | -3.837 | -6.157  |
| ATOM | 595 | O       | VAL | 40     | 24.953 | -4.988 | -5.929  |
| ATOM | 596 | NA      | NA  | 41     | -2.351 | 20.713 | -11.483 |
| ATOM | 597 | NA      | NA  | 42     | 3.649  | 4.713  | -0.483  |
| ATOM | 598 | NA      | NA  | 43     | -7.351 | 17.713 | -12.483 |

**Final MD structure (after 10 ns relaxation) of the tenth NMR isoform with 3 Na<sup>+</sup> counterions**

|      |    |     |     |   |        |        |         |
|------|----|-----|-----|---|--------|--------|---------|
| ATOM | 1  | N   | ASP | 1 | 3.793  | 23.039 | -9.572  |
| ATOM | 2  | HN  | ASP | 1 | 3.580  | 22.096 | -9.438  |
| ATOM | 3  | CA  | ASP | 1 | 2.637  | 23.892 | -9.165  |
| ATOM | 4  | HA  | ASP | 1 | 2.967  | 24.757 | -8.764  |
| ATOM | 5  | CB  | ASP | 1 | 1.586  | 24.010 | -10.279 |
| ATOM | 6  | HB1 | ASP | 1 | 2.059  | 24.449 | -11.078 |
| ATOM | 7  | HB2 | ASP | 1 | 0.789  | 24.502 | -9.988  |
| ATOM | 8  | CG  | ASP | 1 | 1.082  | 22.616 | -10.743 |
| ATOM | 9  | OD1 | ASP | 1 | 1.766  | 21.799 | -11.320 |
| ATOM | 10 | OD2 | ASP | 1 | -0.139 | 22.320 | -10.595 |
| ATOM | 11 | C   | ASP | 1 | 2.006  | 23.033 | -8.131  |
| ATOM | 12 | O   | ASP | 1 | 2.638  | 22.006 | -7.865  |
| ATOM | 13 | N   | ALA | 2 | 0.922  | 23.319 | -7.471  |
| ATOM | 14 | HN  | ALA | 2 | 0.360  | 24.081 | -7.519  |
| ATOM | 15 | CA  | ALA | 2 | 0.460  | 22.349 | -6.429  |
| ATOM | 16 | HA  | ALA | 2 | 0.671  | 21.368 | -6.771  |

|      |    |         |     |        |        |        |        |
|------|----|---------|-----|--------|--------|--------|--------|
| ATOM | 17 | CB      | ALA | 2      | 1.000  | 22.663 | -4.984 |
| ATOM | 18 | HB1     | ALA | 2      | 0.786  | 23.511 | -4.654 |
| ATOM | 19 | HB2     | ALA | 2      | 0.542  | 22.016 | -4.423 |
| ATOM | 20 | HB3     | ALA | 2      | 2.024  | 22.543 | -4.851 |
| ATOM | 21 | C       | ALA | 2      | -1.025 | 22.504 | -6.505 |
| ATOM | 22 | O       | ALA | 2      | -1.478 | 23.515 | -7.099 |
| ATOM | 23 | N       | GLU | 3      | -1.849 | 21.568 | -5.942 |
| ATOM | 24 | HN      | GLU | 3      | -1.480 | 20.781 | -5.493 |
| ATOM | 25 | CA      | GLU | 3      | -3.282 | 21.682 | -6.001 |
| ATOM | 26 | HA      | GLU | 3      | -3.538 | 22.635 | -6.235 |
| ATOM | 27 | CB      | GLU | 3      | -3.861 | 20.707 | -6.916 |
| ATOM | 28 | HB1     | GLU | 3      | -3.554 | 19.753 | -6.781 |
| ATOM | 29 | HB2     | GLU | 3      | -3.564 | 20.901 | -7.811 |
| ATOM | 30 | CG      | GLU | 3      | -5.382 | 20.711 | -7.143 |
| ATOM | 31 | HG1     | GLU | 3      | -5.700 | 21.604 | -7.526 |
| ATOM | 32 | HG2     | GLU | 3      | -5.815 | 20.482 | -6.321 |
| ATOM | 33 | CD      | GLU | 3      | -5.704 | 19.677 | -8.223 |
| ATOM | 34 | OE1     | GLU | 3      | -6.759 | 19.128 | -8.261 |
| ATOM | 35 | OE2     | GLU | 3      | -5.007 | 19.461 | -9.191 |
| ATOM | 36 | C       | GLU | 3      | -3.493 | 21.324 | -4.553 |
| ATOM | 37 | O       | GLU | 3      | -2.466 | 21.288 | -3.846 |
| ATOM | 38 | N       | PHE | 4      | -4.720 | 21.037 | -3.952 |
| ATOM | 39 | HN      | PHE | 4      | -5.591 | 21.036 | -4.311 |
| ATOM | 40 | CA      | PHE | 4      | -4.691 | 20.746 | -2.536 |
| ATOM | 41 | HA      | PHE | 4      | -3.844 | 21.114 | -2.216 |
| ATOM | 42 | CB      | PHE | 4      | -5.729 | 21.283 | -1.597 |
| ATOM | 43 | HCB1PHE | 4   | -5.398 | 21.043 | -0.632 |        |
| ATOM | 44 | HCB2PHE | 4   | -6.604 | 20.864 | -1.828 |        |
| ATOM | 45 | CG      | PHE | 4      | -5.860 | 22.802 | -1.619 |
| ATOM | 46 | CD1     | PHE | 4      | -4.729 | 23.725 | -1.790 |
| ATOM | 47 | HCD1PHE | 4   | -3.839 | 23.310 | -1.865 |        |
| ATOM | 48 | CE1     | PHE | 4      | -4.935 | 25.120 | -1.738 |
| ATOM | 49 | HCE1PHE | 4   | -4.156 | 25.723 | -1.810 |        |
| ATOM | 50 | CZ      | PHE | 4      | -6.305 | 25.670 | -1.567 |
| ATOM | 51 | HCZ     | PHE | 4      | -6.448 | 26.623 | -1.513 |
| ATOM | 52 | CE2     | PHE | 4      | -7.443 | 24.755 | -1.443 |
| ATOM | 53 | HCE2PHE | 4   | -8.386 | 25.157 | -1.355 |        |
| ATOM | 54 | CD2     | PHE | 4      | -7.215 | 23.328 | -1.449 |
| ATOM | 55 | HCD2PHE | 4   | -8.049 | 22.780 | -1.374 |        |
| ATOM | 56 | C       | PHE | 4      | -4.804 | 19.263 | -2.378 |
| ATOM | 57 | O       | PHE | 4      | -3.839 | 18.659 | -2.770 |
| ATOM | 58 | N       | ARG | 5      | -5.831 | 18.599 | -1.822 |
| ATOM | 59 | HN      | ARG | 5      | -6.638 | 19.056 | -1.518 |
| ATOM | 60 | CA      | ARG | 5      | -5.757 | 17.194 | -1.705 |
| ATOM | 61 | HA      | ARG | 5      | -4.787 | 16.981 | -1.544 |
| ATOM | 62 | CB      | ARG | 5      | -6.766 | 16.709 | -0.667 |
| ATOM | 63 | HB1     | ARG | 5      | -7.712 | 16.978 | -1.010 |
| ATOM | 64 | HB2     | ARG | 5      | -6.547 | 17.170 | 0.114  |
| ATOM | 65 | CG      | ARG | 5      | -6.656 | 15.201 | -0.395 |

|      |     |         |     |        |        |        |         |
|------|-----|---------|-----|--------|--------|--------|---------|
| ATOM | 66  | HG1     | ARG | 5      | -6.819 | 14.569 | -1.205  |
| ATOM | 67  | HG2     | ARG | 5      | -7.350 | 14.924 | 0.265   |
| ATOM | 68  | CD      | ARG | 5      | -5.267 | 15.003 | 0.239   |
| ATOM | 69  | HD1     | ARG | 5      | -5.169 | 15.686 | 0.964   |
| ATOM | 70  | HD2     | ARG | 5      | -4.608 | 15.222 | -0.434  |
| ATOM | 71  | NE      | ARG | 5      | -5.156 | 13.704 | 0.808   |
| ATOM | 72  | HE      | ARG | 5      | -5.705 | 12.973 | 0.383   |
| ATOM | 73  | CZ      | ARG | 5      | -4.291 | 13.577 | 1.854   |
| ATOM | 74  | NH1     | ARG | 5      | -3.689 | 14.711 | 2.258   |
| ATOM | 75  | HH11ARG | 5   | -3.012 | 14.706 | 3.049  |         |
| ATOM | 76  | HH12ARG | 5   | -3.813 | 15.613 | 1.883  |         |
| ATOM | 77  | NH2     | ARG | 5      | -4.095 | 12.336 | 2.501   |
| ATOM | 78  | HH21ARG | 5   | -3.511 | 12.255 | 3.270  |         |
| ATOM | 79  | HH22ARG | 5   | -4.464 | 11.475 | 2.255  |         |
| ATOM | 80  | C       | ARG | 5      | -6.387 | 16.569 | -2.909  |
| ATOM | 81  | O       | ARG | 5      | -7.539 | 16.934 | -3.097  |
| ATOM | 82  | N       | HIE | 6      | -5.763 | 15.753 | -3.708  |
| ATOM | 83  | HN      | HIE | 6      | -4.792 | 15.392 | -3.666  |
| ATOM | 84  | CA      | HIE | 6      | -6.428 | 15.158 | -4.902  |
| ATOM | 85  | HA      | HIE | 6      | -7.150 | 14.621 | -4.577  |
| ATOM | 86  | CB      | HIE | 6      | -6.770 | 16.049 | -6.124  |
| ATOM | 87  | HB1     | HIE | 6      | -5.979 | 16.522 | -6.374  |
| ATOM | 88  | HB2     | HIE | 6      | -7.438 | 16.685 | -5.845  |
| ATOM | 89  | CG      | HIE | 6      | -7.382 | 15.319 | -7.341  |
| ATOM | 90  | ND1     | HIE | 6      | -6.850 | 15.146 | -8.559  |
| ATOM | 91  | HE2     | HIE | 6      | -9.803 | 13.875 | -8.962  |
| ATOM | 92  | CE1     | HIE | 6      | -7.784 | 14.503 | -9.311  |
| ATOM | 93  | HE1     | HIE | 6      | -7.585 | 14.256 | -10.264 |
| ATOM | 94  | NE2     | HIE | 6      | -8.951 | 14.289 | -8.675  |
| ATOM | 95  | CD2     | HIE | 6      | -8.746 | 14.819 | -7.457  |
| ATOM | 96  | HD2     | HIE | 6      | -9.407 | 14.768 | -6.789  |
| ATOM | 97  | C       | HIE | 6      | -5.165 | 14.396 | -5.273  |
| ATOM | 98  | O       | HIE | 6      | -4.720 | 13.631 | -4.398  |
| ATOM | 99  | N       | ASP | 7      | -4.582 | 14.650 | -6.487  |
| ATOM | 100 | HN      | ASP | 7      | -4.935 | 15.292 | -7.074  |
| ATOM | 101 | CA      | ASP | 7      | -3.369 | 14.023 | -7.051  |
| ATOM | 102 | HA      | ASP | 7      | -3.429 | 13.022 | -6.921  |
| ATOM | 103 | CB      | ASP | 7      | -3.222 | 14.337 | -8.558  |
| ATOM | 104 | HB1     | ASP | 7      | -4.024 | 14.005 | -9.048  |
| ATOM | 105 | HB2     | ASP | 7      | -2.364 | 13.944 | -8.896  |
| ATOM | 106 | CG      | ASP | 7      | -3.206 | 15.756 | -8.805  |
| ATOM | 107 | OD1     | ASP | 7      | -2.442 | 16.258 | -9.652  |
| ATOM | 108 | OD2     | ASP | 7      | -4.083 | 16.525 | -8.426  |
| ATOM | 109 | C       | ASP | 7      | -2.157 | 14.499 | -6.348  |
| ATOM | 110 | O       | ASP | 7      | -1.088 | 13.855 | -6.447  |
| ATOM | 111 | N       | SER | 8      | -2.228 | 15.596 | -5.624  |
| ATOM | 112 | HN      | SER | 8      | -3.016 | 16.163 | -5.521  |
| ATOM | 113 | CA      | SER | 8      | -1.117 | 16.031 | -4.837  |
| ATOM | 114 | HA      | SER | 8      | -0.320 | 15.492 | -4.925  |



|      |     |      |     |    |        |        |        |
|------|-----|------|-----|----|--------|--------|--------|
| ATOM | 115 | CB   | SER | 8  | -0.826 | 17.552 | -5.065 |
| ATOM | 116 | HB1  | SER | 8  | -0.405 | 17.611 | -5.995 |
| ATOM | 117 | HB2  | SER | 8  | -0.142 | 17.962 | -4.444 |
| ATOM | 118 | OG   | SER | 8  | -2.033 | 18.331 | -5.096 |
| ATOM | 119 | HG   | SER | 8  | -2.335 | 18.520 | -4.079 |
| ATOM | 120 | C    | SER | 8  | -1.610 | 15.725 | -3.478 |
| ATOM | 121 | O    | SER | 8  | -2.823 | 15.700 | -3.452 |
| ATOM | 122 | N    | GLY | 9  | -0.870 | 15.494 | -2.408 |
| ATOM | 123 | HN   | GLY | 9  | 0.111  | 15.528 | -2.421 |
| ATOM | 124 | CA   | GLY | 9  | -1.547 | 15.275 | -1.136 |
| ATOM | 125 | HA1  | GLY | 9  | -2.351 | 15.892 | -1.050 |
| ATOM | 126 | HA2  | GLY | 9  | -0.850 | 15.524 | -0.458 |
| ATOM | 127 | C    | GLY | 9  | -1.850 | 13.783 | -1.071 |
| ATOM | 128 | O    | GLY | 9  | -1.624 | 13.182 | 0.011  |
| ATOM | 129 | N    | TYR | 10 | -2.457 | 13.140 | -2.068 |
| ATOM | 130 | HN   | TYR | 10 | -2.684 | 13.557 | -2.916 |
| ATOM | 131 | CA   | TYR | 10 | -2.792 | 11.723 | -1.927 |
| ATOM | 132 | HA   | TYR | 10 | -2.404 | 11.317 | -1.122 |
| ATOM | 133 | CB   | TYR | 10 | -4.355 | 11.510 | -1.968 |
| ATOM | 134 | HCB1 | TYR | 10 | -4.687 | 11.806 | -2.823 |
| ATOM | 135 | HCB2 | TYR | 10 | -4.812 | 12.174 | -1.342 |
| ATOM | 136 | CG   | TYR | 10 | -4.858 | 10.100 | -1.640 |
| ATOM | 137 | CD1  | TYR | 10 | -4.145 | 9.227  | -0.704 |
| ATOM | 138 | HCD1 | TYR | 10 | -3.257 | 9.649  | -0.278 |
| ATOM | 139 | CE1  | TYR | 10 | -4.757 | 7.899  | -0.387 |
| ATOM | 140 | HCE1 | TYR | 10 | -4.291 | 7.284  | 0.282  |
| ATOM | 141 | CZ   | TYR | 10 | -6.008 | 7.424  | -0.967 |
| ATOM | 142 | OH   | TYR | 10 | -6.564 | 6.277  | -0.696 |
| ATOM | 143 | HOH  | TYR | 10 | -6.178 | 5.792  | 0.124  |
| ATOM | 144 | CE2  | TYR | 10 | -6.677 | 8.302  | -1.896 |
| ATOM | 145 | HCE2 | TYR | 10 | -7.509 | 7.993  | -2.331 |
| ATOM | 146 | CD2  | TYR | 10 | -6.078 | 9.605  | -2.189 |
| ATOM | 147 | HCD2 | TYR | 10 | -6.567 | 10.151 | -2.859 |
| ATOM | 148 | C    | TYR | 10 | -2.052 | 11.285 | -3.086 |
| ATOM | 149 | O    | TYR | 10 | -1.714 | 12.154 | -3.868 |
| ATOM | 150 | N    | GLU | 11 | -1.719 | 9.997  | -3.273 |
| ATOM | 151 | HN   | GLU | 11 | -1.955 | 9.254  | -2.633 |
| ATOM | 152 | CA   | GLU | 11 | -0.899 | 9.727  | -4.444 |
| ATOM | 153 | HA   | GLU | 11 | -0.584 | 10.552 | -4.853 |
| ATOM | 154 | CB   | GLU | 11 | 0.497  | 9.256  | -3.907 |
| ATOM | 155 | HB1  | GLU | 11 | 0.448  | 8.415  | -3.404 |
| ATOM | 156 | HB2  | GLU | 11 | 0.771  | 9.907  | -3.228 |
| ATOM | 157 | CG   | GLU | 11 | 1.687  | 9.141  | -4.918 |
| ATOM | 158 | HG1  | GLU | 11 | 2.508  | 9.013  | -4.408 |
| ATOM | 159 | HG2  | GLU | 11 | 1.755  | 9.930  | -5.511 |
| ATOM | 160 | CD   | GLU | 11 | 1.620  | 7.961  | -5.851 |
| ATOM | 161 | OE1  | GLU | 11 | 1.832  | 6.863  | -5.427 |
| ATOM | 162 | OE2  | GLU | 11 | 1.474  | 8.086  | -7.053 |
| ATOM | 163 | C    | GLU | 11 | -1.626 | 8.855  | -5.469 |

|      |     |         |     |        |         |        |         |
|------|-----|---------|-----|--------|---------|--------|---------|
| ATOM | 164 | O       | GLU | 11     | -1.687  | 9.115  | -6.712  |
| ATOM | 165 | N       | VAL | 12     | -2.286  | 7.743  | -5.067  |
| ATOM | 166 | HN      | VAL | 12     | -2.365  | 7.371  | -4.148  |
| ATOM | 167 | CA      | VAL | 12     | -2.907  | 6.996  | -6.058  |
| ATOM | 168 | HA      | VAL | 12     | -2.921  | 7.406  | -6.982  |
| ATOM | 169 | CB      | VAL | 12     | -2.415  | 5.526  | -6.117  |
| ATOM | 170 | HB      | VAL | 12     | -3.036  | 5.063  | -6.776  |
| ATOM | 171 | CG1     | VAL | 12     | -0.945  | 5.388  | -6.544  |
| ATOM | 172 | HG11VAL | 12  | -0.340 | 5.739   | -5.856 |         |
| ATOM | 173 | HG12VAL | 12  | -0.706 | 4.459   | -6.705 |         |
| ATOM | 174 | HG13VAL | 12  | -0.776 | 5.943   | -7.319 |         |
| ATOM | 175 | CG2     | VAL | 12     | -2.391  | 4.783  | -4.812  |
| ATOM | 176 | HG21VAL | 12  | -1.796 | 5.222   | -4.133 |         |
| ATOM | 177 | HG22VAL | 12  | -3.296 | 4.858   | -4.366 |         |
| ATOM | 178 | HG23VAL | 12  | -2.233 | 3.830   | -4.952 |         |
| ATOM | 179 | C       | VAL | 12     | -4.257  | 7.078  | -5.495  |
| ATOM | 180 | O       | VAL | 12     | -4.360  | 7.366  | -4.292  |
| ATOM | 181 | N       | HIS | 13     | -5.306  | 6.945  | -6.289  |
| ATOM | 182 | HN      | HIS | 13     | -5.093  | 6.722  | -7.216  |
| ATOM | 183 | CA      | HIS | 13     | -6.622  | 7.127  | -5.818  |
| ATOM | 184 | HA      | HIS | 13     | -6.540  | 7.391  | -4.818  |
| ATOM | 185 | CB      | HIS | 13     | -7.600  | 7.962  | -6.682  |
| ATOM | 186 | HB1     | HIS | 13     | -8.541  | 7.977  | -6.160  |
| ATOM | 187 | HB2     | HIS | 13     | -7.609  | 7.556  | -7.627  |
| ATOM | 188 | CG      | HIS | 13     | -7.160  | 9.387  | -6.785  |
| ATOM | 189 | ND1     | HIS | 13     | -7.325  | 10.125 | -7.870  |
| ATOM | 190 | HD1     | HIS | 13     | -7.750  | 9.851  | -8.699  |
| ATOM | 191 | CE1     | HIS | 13     | -6.786  | 11.334 | -7.608  |
| ATOM | 192 | HE1     | HIS | 13     | -6.811  | 12.019 | -8.378  |
| ATOM | 193 | NE2     | HIS | 13     | -6.285  | 11.403 | -6.406  |
| ATOM | 194 | CD2     | HIS | 13     | -6.486  | 10.193 | -5.818  |
| ATOM | 195 | HD2     | HIS | 13     | -6.209  | 9.862  | -4.897  |
| ATOM | 196 | C       | HIS | 13     | -7.305  | 5.802  | -5.782  |
| ATOM | 197 | O       | HIS | 13     | -8.533  | 5.845  | -5.889  |
| ATOM | 198 | N       | HIS | 14     | -6.670  | 4.650  | -5.665  |
| ATOM | 199 | HN      | HIS | 14     | -5.677  | 4.532  | -5.547  |
| ATOM | 200 | CA      | HIS | 14     | -7.506  | 3.450  | -5.635  |
| ATOM | 201 | HA      | HIS | 14     | -8.445  | 3.620  | -5.270  |
| ATOM | 202 | CB      | HIS | 14     | -7.532  | 2.681  | -6.985  |
| ATOM | 203 | HB1     | HIS | 14     | -7.977  | 1.758  | -6.842  |
| ATOM | 204 | HB2     | HIS | 14     | -6.624  | 2.578  | -7.296  |
| ATOM | 205 | CG      | HIS | 14     | -8.399  | 3.370  | -8.029  |
| ATOM | 206 | ND1     | HIS | 14     | -8.096  | 4.329  | -8.851  |
| ATOM | 207 | HD1     | HIS | 14     | -7.213  | 4.743  | -8.850  |
| ATOM | 208 | CE1     | HIS | 14     | -9.122  | 4.704  | -9.629  |
| ATOM | 209 | HE1     | HIS | 14     | -9.104  | 5.438  | -10.238 |
| ATOM | 210 | NE2     | HIS | 14     | -10.224 | 3.929  | -9.334  |
| ATOM | 211 | CD2     | HIS | 14     | -9.787  | 3.083  | -8.356  |
| ATOM | 212 | HD2     | HIS | 14     | -10.351 | 2.361  | -7.951  |

|      |     |      |     |    |        |        |        |
|------|-----|------|-----|----|--------|--------|--------|
| ATOM | 213 | C    | HIS | 14 | -6.819 | 2.718  | -4.550 |
| ATOM | 214 | O    | HIS | 14 | -5.572 | 2.825  | -4.530 |
| ATOM | 215 | N    | GLN | 15 | -7.377 | 1.906  | -3.640 |
| ATOM | 216 | HN   | GLN | 15 | -8.344 | 1.784  | -3.608 |
| ATOM | 217 | CA   | GLN | 15 | -6.502 | 1.292  | -2.671 |
| ATOM | 218 | HA   | GLN | 15 | -5.877 | 2.051  | -2.303 |
| ATOM | 219 | CB   | GLN | 15 | -7.294 | 0.619  | -1.494 |
| ATOM | 220 | HB1  | GLN | 15 | -7.883 | -0.140 | -1.899 |
| ATOM | 221 | HB2  | GLN | 15 | -7.818 | 1.349  | -1.070 |
| ATOM | 222 | CG   | GLN | 15 | -6.470 | -0.075 | -0.315 |
| ATOM | 223 | HG1  | GLN | 15 | -5.887 | 0.577  | 0.140  |
| ATOM | 224 | HG2  | GLN | 15 | -5.954 | -0.797 | -0.764 |
| ATOM | 225 | CD   | GLN | 15 | -7.421 | -0.550 | 0.764  |
| ATOM | 226 | OE1  | GLN | 15 | -7.003 | -0.631 | 1.944  |
| ATOM | 227 | NE2  | GLN | 15 | -8.704 | -0.906 | 0.451  |
| ATOM | 228 | HE21 | GLN | 15 | -9.366 | -1.247 | 1.096  |
| ATOM | 229 | HE22 | GLN | 15 | -9.065 | -0.843 | -0.482 |
| ATOM | 230 | C    | GLN | 15 | -5.730 | 0.159  | -3.328 |
| ATOM | 231 | O    | GLN | 15 | -4.672 | -0.143 | -2.903 |
| ATOM | 232 | N    | LYS | 16 | -6.111 | -0.479 | -4.468 |
| ATOM | 233 | HN   | LYS | 16 | -6.937 | -0.220 | -4.901 |
| ATOM | 234 | CA   | LYS | 16 | -5.326 | -1.598 | -4.928 |
| ATOM | 235 | HA1  | LYS | 16 | -4.937 | -2.037 | -4.066 |
| ATOM | 236 | CB   | LYS | 16 | -6.145 | -2.637 | -5.747 |
| ATOM | 237 | HB1  | LYS | 16 | -6.565 | -2.166 | -6.555 |
| ATOM | 238 | HB2  | LYS | 16 | -6.938 | -2.934 | -5.175 |
| ATOM | 239 | CG   | LYS | 16 | -5.499 | -3.961 | -6.262 |
| ATOM | 240 | HG1  | LYS | 16 | -4.791 | -3.764 | -7.017 |
| ATOM | 241 | HG2  | LYS | 16 | -6.244 | -4.418 | -6.669 |
| ATOM | 242 | CD   | LYS | 16 | -4.984 | -4.809 | -5.118 |
| ATOM | 243 | HD1  | LYS | 16 | -5.661 | -5.018 | -4.391 |
| ATOM | 244 | HD2  | LYS | 16 | -4.197 | -4.313 | -4.655 |
| ATOM | 245 | CE   | LYS | 16 | -4.419 | -6.116 | -5.787 |
| ATOM | 246 | HE1  | LYS | 16 | -3.944 | -6.687 | -5.133 |
| ATOM | 247 | HE2  | LYS | 16 | -3.770 | -5.847 | -6.506 |
| ATOM | 248 | NZ   | LYS | 16 | -5.492 | -6.854 | -6.449 |
| ATOM | 249 | HZ1  | LYS | 16 | -6.067 | -6.312 | -7.047 |
| ATOM | 250 | HZ2  | LYS | 16 | -5.093 | -7.607 | -6.970 |
| ATOM | 251 | HZ3  | LYS | 16 | -6.055 | -7.274 | -5.732 |
| ATOM | 252 | C    | LYS | 16 | -4.160 | -0.937 | -5.687 |
| ATOM | 253 | O    | LYS | 16 | -3.104 | -1.534 | -5.981 |
| ATOM | 254 | N    | LEU | 17 | -4.243 | 0.357  | -5.899 |
| ATOM | 255 | HN   | LEU | 17 | -5.058 | 0.864  | -5.665 |
| ATOM | 256 | CA   | LEU | 17 | -3.146 | 0.961  | -6.509 |
| ATOM | 257 | HA   | LEU | 17 | -2.759 | 0.269  | -7.185 |
| ATOM | 258 | CB   | LEU | 17 | -3.352 | 2.243  | -7.290 |
| ATOM | 259 | HB1  | LEU | 17 | -2.453 | 2.545  | -7.551 |
| ATOM | 260 | HB2  | LEU | 17 | -3.822 | 2.918  | -6.638 |
| ATOM | 261 | CG   | LEU | 17 | -4.054 | 2.201  | -8.605 |

|      |     |      |     |    |        |        |         |
|------|-----|------|-----|----|--------|--------|---------|
| ATOM | 262 | HG   | LEU | 17 | -4.980 | 1.915  | -8.361  |
| ATOM | 263 | CD1  | LEU | 17 | -4.077 | 3.583  | -9.308  |
| ATOM | 264 | HD11 | LEU | 17 | -4.355 | 4.258  | -8.630  |
| ATOM | 265 | HD12 | LEU | 17 | -3.180 | 3.864  | -9.594  |
| ATOM | 266 | HD13 | LEU | 17 | -4.707 | 3.570  | -10.089 |
| ATOM | 267 | CD2  | LEU | 17 | -3.494 | 1.055  | -9.499  |
| ATOM | 268 | HD21 | LEU | 17 | -2.575 | 1.287  | -9.848  |
| ATOM | 269 | HD22 | LEU | 17 | -3.567 | 0.174  | -9.020  |
| ATOM | 270 | HD23 | LEU | 17 | -4.048 | 1.002  | -10.320 |
| ATOM | 271 | C    | LEU | 17 | -2.238 | 1.265  | -5.387  |
| ATOM | 272 | O    | LEU | 17 | -1.072 | 1.453  | -5.694  |
| ATOM | 273 | N    | VAL | 18 | -2.523 | 1.317  | -4.122  |
| ATOM | 274 | HN   | VAL | 18 | -3.434 | 1.172  | -3.764  |
| ATOM | 275 | CA   | VAL | 18 | -1.443 | 1.535  | -3.140  |
| ATOM | 276 | HA   | VAL | 18 | -0.971 | 2.435  | -3.300  |
| ATOM | 277 | CB   | VAL | 18 | -2.295 | 1.616  | -1.861  |
| ATOM | 278 | HB   | VAL | 18 | -2.815 | 0.795  | -1.869  |
| ATOM | 279 | CG1  | VAL | 18 | -1.557 | 1.649  | -0.506  |
| ATOM | 280 | HG11 | VAL | 18 | -2.239 | 1.520  | 0.201   |
| ATOM | 281 | HG12 | VAL | 18 | -0.920 | 0.852  | -0.497  |
| ATOM | 282 | HG13 | VAL | 18 | -1.050 | 2.549  | -0.329  |
| ATOM | 283 | CG2  | VAL | 18 | -3.251 | 2.833  | -2.025  |
| ATOM | 284 | HG21 | VAL | 18 | -3.859 | 2.768  | -1.230  |
| ATOM | 285 | HG22 | VAL | 18 | -2.782 | 3.701  | -2.050  |
| ATOM | 286 | HG23 | VAL | 18 | -3.770 | 2.755  | -2.802  |
| ATOM | 287 | C    | VAL | 18 | -0.518 | 0.307  | -3.052  |
| ATOM | 288 | O    | VAL | 18 | 0.674  | 0.421  | -2.708  |
| ATOM | 289 | N    | PHE | 19 | -1.044 | -0.881 | -3.388  |
| ATOM | 290 | HN   | PHE | 19 | -1.995 | -1.002 | -3.647  |
| ATOM | 291 | CA   | PHE | 19 | -0.143 | -2.043 | -3.374  |
| ATOM | 292 | HA   | PHE | 19 | 0.460  | -1.933 | -2.599  |
| ATOM | 293 | CB   | PHE | 19 | -0.753 | -3.409 | -3.238  |
| ATOM | 294 | HCB1 | PHE | 19 | 0.001  | -4.066 | -3.176  |
| ATOM | 295 | HCB2 | PHE | 19 | -1.312 | -3.694 | -4.033  |
| ATOM | 296 | CG   | PHE | 19 | -1.594 | -3.478 | -1.973  |
| ATOM | 297 | CD1  | PHE | 19 | -3.061 | -3.198 | -1.977  |
| ATOM | 298 | HCD1 | PHE | 19 | -3.583 | -2.951 | -2.777  |
| ATOM | 299 | CE1  | PHE | 19 | -3.813 | -3.277 | -0.744  |
| ATOM | 300 | HCE1 | PHE | 19 | -4.785 | -3.105 | -0.733  |
| ATOM | 301 | CZ   | PHE | 19 | -3.090 | -3.699 | 0.457   |
| ATOM | 302 | HCZ  | PHE | 19 | -3.552 | -3.740 | 1.375   |
| ATOM | 303 | CE2  | PHE | 19 | -1.671 | -3.976 | 0.466   |
| ATOM | 304 | HCE2 | PHE | 19 | -1.192 | -4.230 | 1.312   |
| ATOM | 305 | CD2  | PHE | 19 | -0.912 | -3.872 | -0.732  |
| ATOM | 306 | HCD2 | PHE | 19 | 0.017  | -4.068 | -0.725  |
| ATOM | 307 | C    | PHE | 19 | 0.585  | -2.033 | -4.675  |
| ATOM | 308 | O    | PHE | 19 | 1.467  | -2.760 | -4.937  |
| ATOM | 309 | N    | PHE | 20 | 0.157  | -1.216 | -5.638  |
| ATOM | 310 | HN   | PHE | 20 | -0.590 | -0.554 | -5.570  |

|      |     |         |     |    |        |        |         |
|------|-----|---------|-----|----|--------|--------|---------|
| ATOM | 311 | CA      | PHE | 20 | 0.819  | -1.257 | -6.899  |
| ATOM | 312 | HA      | PHE | 20 | 1.170  | -2.173 | -7.159  |
| ATOM | 313 | CB      | PHE | 20 | -0.109 | -0.740 | -8.054  |
| ATOM | 314 | HCB1PHE |     | 20 | -0.537 | 0.160  | -7.835  |
| ATOM | 315 | HCB2PHE |     | 20 | -0.831 | -1.432 | -8.168  |
| ATOM | 316 | CG      | PHE | 20 | 0.675  | -0.780 | -9.338  |
| ATOM | 317 | CD1     | PHE | 20 | 1.199  | -2.068 | -9.848  |
| ATOM | 318 | HCD1PHE |     | 20 | 1.022  | -2.950 | -9.373  |
| ATOM | 319 | CE1     | PHE | 20 | 1.939  | -2.123 | -11.094 |
| ATOM | 320 | HCE1PHE |     | 20 | 2.236  | -3.000 | -11.419 |
| ATOM | 321 | CZ      | PHE | 20 | 2.205  | -0.933 | -11.862 |
| ATOM | 322 | HCZ     | PHE | 20 | 2.688  | -0.911 | -12.712 |
| ATOM | 323 | CE2     | PHE | 20 | 1.717  | 0.363  | -11.345 |
| ATOM | 324 | HCE2PHE |     | 20 | 1.934  | 1.180  | -11.866 |
| ATOM | 325 | CD2     | PHE | 20 | 0.948  | 0.420  | -10.113 |
| ATOM | 326 | HCD2PHE |     | 20 | 0.597  | 1.230  | -9.762  |
| ATOM | 327 | C       | PHE | 20 | 1.954  | -0.278 | -6.738  |
| ATOM | 328 | O       | PHE | 20 | 3.111  | -0.634 | -7.011  |
| ATOM | 329 | N       | ALA | 21 | 1.713  | 0.961  | -6.304  |
| ATOM | 330 | HN      | ALA | 21 | 0.756  | 1.190  | -6.064  |
| ATOM | 331 | CA      | ALA | 21 | 2.831  | 1.955  | -6.146  |
| ATOM | 332 | HA      | ALA | 21 | 3.264  | 1.941  | -7.035  |
| ATOM | 333 | CB      | ALA | 21 | 2.428  | 3.367  | -5.749  |
| ATOM | 334 | HB1     | ALA | 21 | 3.269  | 3.935  | -5.653  |
| ATOM | 335 | HB2     | ALA | 21 | 1.835  | 3.783  | -6.417  |
| ATOM | 336 | HB3     | ALA | 21 | 1.987  | 3.337  | -4.884  |
| ATOM | 337 | C       | ALA | 21 | 3.849  | 1.508  | -5.102  |
| ATOM | 338 | O       | ALA | 21 | 5.055  | 1.742  | -5.326  |
| ATOM | 339 | N       | GLU | 22 | 3.475  | 0.960  | -3.953  |
| ATOM | 340 | HN      | GLU | 22 | 2.520  | 0.734  | -3.742  |
| ATOM | 341 | CA      | GLU | 22 | 4.535  | 0.600  | -2.969  |
| ATOM | 342 | HA      | GLU | 22 | 5.281  | 1.270  | -3.094  |
| ATOM | 343 | CB      | GLU | 22 | 4.138  | 0.628  | -1.466  |
| ATOM | 344 | HB1     | GLU | 22 | 4.869  | 0.196  | -0.896  |
| ATOM | 345 | HB2     | GLU | 22 | 3.274  | 0.122  | -1.273  |
| ATOM | 346 | CG      | GLU | 22 | 4.047  | 2.140  | -0.938  |
| ATOM | 347 | HG1     | GLU | 22 | 4.932  | 2.520  | -1.059  |
| ATOM | 348 | HG2     | GLU | 22 | 3.787  | 2.138  | 0.096   |
| ATOM | 349 | CD      | GLU | 22 | 3.154  | 3.148  | -1.661  |
| ATOM | 350 | OE1     | GLU | 22 | 1.935  | 2.983  | -1.775  |
| ATOM | 351 | OE2     | GLU | 22 | 3.618  | 4.233  | -2.062  |
| ATOM | 352 | C       | GLU | 22 | 5.078  | -0.666 | -3.496  |
| ATOM | 353 | O       | GLU | 22 | 6.211  | -0.908 | -3.122  |
| ATOM | 354 | N       | ASP | 23 | 4.491  | -1.522 | -4.351  |
| ATOM | 355 | HN      | ASP | 23 | 3.604  | -1.387 | -4.697  |
| ATOM | 356 | CA      | ASP | 23 | 5.279  | -2.714 | -4.725  |
| ATOM | 357 | HA      | ASP | 23 | 5.839  | -3.114 | -3.927  |
| ATOM | 358 | CB      | ASP | 23 | 4.471  | -3.846 | -5.329  |
| ATOM | 359 | HB1     | ASP | 23 | 3.931  | -3.477 | -6.043  |

|      |     |      |     |    |        |        |         |
|------|-----|------|-----|----|--------|--------|---------|
| ATOM | 360 | HB2  | ASP | 23 | 3.910  | -4.234 | -4.661  |
| ATOM | 361 | CG   | ASP | 23 | 5.407  | -4.902 | -5.885  |
| ATOM | 362 | OD1  | ASP | 23 | 6.172  | -5.556 | -5.211  |
| ATOM | 363 | OD2  | ASP | 23 | 5.504  | -5.099 | -7.090  |
| ATOM | 364 | C    | ASP | 23 | 6.315  | -2.238 | -5.673  |
| ATOM | 365 | O    | ASP | 23 | 7.475  | -2.609 | -5.513  |
| ATOM | 366 | N    | VAL | 24 | 5.977  | -1.360 | -6.689  |
| ATOM | 367 | HN   | VAL | 24 | 5.050  | -1.086 | -6.788  |
| ATOM | 368 | CA   | VAL | 24 | 6.893  | -0.860 | -7.633  |
| ATOM | 369 | HA   | VAL | 24 | 7.318  | -1.669 | -7.983  |
| ATOM | 370 | CB   | VAL | 24 | 6.251  | -0.130 | -8.853  |
| ATOM | 371 | HB   | VAL | 24 | 5.826  | 0.714  | -8.542  |
| ATOM | 372 | CG1  | VAL | 24 | 7.234  | 0.194  | -10.021 |
| ATOM | 373 | HG11 | VAL | 24 | 7.907  | 0.865  | -9.682  |
| ATOM | 374 | HG12 | VAL | 24 | 7.750  | -0.620 | -10.294 |
| ATOM | 375 | HG13 | VAL | 24 | 6.664  | 0.550  | -10.783 |
| ATOM | 376 | CG2  | VAL | 24 | 5.248  | -1.061 | -9.498  |
| ATOM | 377 | HG21 | VAL | 24 | 4.948  | -0.565 | -10.302 |
| ATOM | 378 | HG22 | VAL | 24 | 5.701  | -1.959 | -9.704  |
| ATOM | 379 | HG23 | VAL | 24 | 4.555  | -1.179 | -8.822  |
| ATOM | 380 | C    | VAL | 24 | 7.935  | -0.017 | -6.938  |
| ATOM | 381 | O    | VAL | 24 | 9.061  | -0.028 | -7.355  |
| ATOM | 382 | N    | GLY | 25 | 7.641  | 0.779  | -5.895  |
| ATOM | 383 | HN   | GLY | 25 | 6.722  | 0.815  | -5.460  |
| ATOM | 384 | CA   | GLY | 25 | 8.696  | 1.593  | -5.268  |
| ATOM | 385 | HA1  | GLY | 25 | 8.360  | 2.293  | -4.672  |
| ATOM | 386 | HA2  | GLY | 25 | 9.244  | 1.983  | -6.016  |
| ATOM | 387 | C    | GLY | 25 | 9.607  | 0.646  | -4.505  |
| ATOM | 388 | O    | GLY | 25 | 10.806 | 0.812  | -4.715  |
| ATOM | 389 | N    | SER | 26 | 9.119  | -0.359 | -3.790  |
| ATOM | 390 | HN   | SER | 26 | 8.135  | -0.532 | -3.662  |
| ATOM | 391 | CA   | SER | 26 | 10.069 | -1.195 | -3.081  |
| ATOM | 392 | HA   | SER | 26 | 10.612 | -0.561 | -2.579  |
| ATOM | 393 | CB   | SER | 26 | 9.290  | -2.177 | -2.145  |
| ATOM | 394 | HB1  | SER | 26 | 9.984  | -2.676 | -1.627  |
| ATOM | 395 | HB2  | SER | 26 | 8.698  | -2.817 | -2.641  |
| ATOM | 396 | OG   | SER | 26 | 8.375  | -1.401 | -1.352  |
| ATOM | 397 | HG   | SER | 26 | 7.412  | -1.327 | -1.762  |
| ATOM | 398 | C    | SER | 26 | 10.850 | -2.009 | -3.971  |
| ATOM | 399 | O    | SER | 26 | 12.017 | -2.240 | -3.648  |
| ATOM | 400 | N    | ASN | 27 | 10.410 | -2.476 | -5.156  |
| ATOM | 401 | HN   | ASN | 27 | 9.439  | -2.344 | -5.405  |
| ATOM | 402 | CA   | ASN | 27 | 11.347 | -3.245 | -6.044  |
| ATOM | 403 | HA   | ASN | 27 | 12.028 | -3.792 | -5.415  |
| ATOM | 404 | CB   | ASN | 27 | 10.792 | -4.236 | -7.099  |
| ATOM | 405 | HB1  | ASN | 27 | 11.565 | -4.720 | -7.551  |
| ATOM | 406 | HB2  | ASN | 27 | 10.250 | -3.714 | -7.755  |
| ATOM | 407 | CG   | ASN | 27 | 9.992  | -5.312 | -6.380  |
| ATOM | 408 | OD1  | ASN | 27 | 10.560 | -6.344 | -6.049  |

|      |     |      |     |    |        |        |         |
|------|-----|------|-----|----|--------|--------|---------|
| ATOM | 409 | ND2  | ASN | 27 | 8.746  | -5.109 | -6.135  |
| ATOM | 410 | HD21 | ASN | 27 | 8.064  | -5.661 | -5.708  |
| ATOM | 411 | HD22 | ASN | 27 | 8.280  | -4.270 | -6.415  |
| ATOM | 412 | C    | ASN | 27 | 12.155 | -2.331 | -6.834  |
| ATOM | 413 | O    | ASN | 27 | 13.240 | -2.770 | -7.147  |
| ATOM | 414 | N    | LYS | 28 | 11.778 | -1.062 | -7.167  |
| ATOM | 415 | HN   | LYS | 28 | 10.877 | -0.592 | -6.941  |
| ATOM | 416 | CA   | LYS | 28 | 12.706 | -0.294 | -7.947  |
| ATOM | 417 | HA1  | LYS | 28 | 13.148 | -0.962 | -8.533  |
| ATOM | 418 | CB   | LYS | 28 | 11.912 | 0.798  | -8.828  |
| ATOM | 419 | HB1  | LYS | 28 | 11.389 | 1.385  | -8.213  |
| ATOM | 420 | HB2  | LYS | 28 | 11.256 | 0.367  | -9.448  |
| ATOM | 421 | CG   | LYS | 28 | 12.818 | 1.708  | -9.725  |
| ATOM | 422 | HG1  | LYS | 28 | 13.252 | 1.060  | -10.288 |
| ATOM | 423 | HG2  | LYS | 28 | 13.460 | 2.203  | -9.130  |
| ATOM | 424 | CD   | LYS | 28 | 12.187 | 2.781  | -10.673 |
| ATOM | 425 | HD1  | LYS | 28 | 11.526 | 2.331  | -11.298 |
| ATOM | 426 | HD2  | LYS | 28 | 12.921 | 3.146  | -11.247 |
| ATOM | 427 | CE   | LYS | 28 | 11.573 | 4.020  | -10.028 |
| ATOM | 428 | HE1  | LYS | 28 | 11.411 | 4.653  | -10.727 |
| ATOM | 429 | HE2  | LYS | 28 | 12.230 | 4.379  | -9.418  |
| ATOM | 430 | NZ   | LYS | 28 | 10.462 | 3.761  | -9.051  |
| ATOM | 431 | HZ1  | LYS | 28 | 10.283 | 4.632  | -8.654  |
| ATOM | 432 | HZ2  | LYS | 28 | 9.638  | 3.403  | -9.528  |
| ATOM | 433 | HZ3  | LYS | 28 | 10.717 | 3.133  | -8.372  |
| ATOM | 434 | C    | LYS | 28 | 13.666 | 0.281  | -6.956  |
| ATOM | 435 | O    | LYS | 28 | 14.681 | 0.843  | -7.381  |
| ATOM | 436 | N    | GLY | 29 | 13.402 | 0.352  | -5.599  |
| ATOM | 437 | HN   | GLY | 29 | 12.601 | -0.020 | -5.195  |
| ATOM | 438 | CA   | GLY | 29 | 14.432 | 0.998  | -4.841  |
| ATOM | 439 | HA1  | GLY | 29 | 14.163 | 1.194  | -3.887  |
| ATOM | 440 | HA2  | GLY | 29 | 14.656 | 1.855  | -5.254  |
| ATOM | 441 | C    | GLY | 29 | 15.666 | 0.146  | -4.768  |
| ATOM | 442 | O    | GLY | 29 | 16.731 | 0.631  | -4.485  |
| ATOM | 443 | N    | ALA | 30 | 15.610 | -1.157 | -5.184  |
| ATOM | 444 | HN   | ALA | 30 | 14.783 | -1.619 | -5.491  |
| ATOM | 445 | CA   | ALA | 30 | 16.834 | -1.929 | -5.209  |
| ATOM | 446 | HA   | ALA | 30 | 17.288 | -1.722 | -4.330  |
| ATOM | 447 | CB   | ALA | 30 | 16.705 | -3.440 | -5.394  |
| ATOM | 448 | HB1  | ALA | 30 | 16.094 | -3.874 | -4.693  |
| ATOM | 449 | HB2  | ALA | 30 | 16.336 | -3.650 | -6.308  |
| ATOM | 450 | HB3  | ALA | 30 | 17.566 | -3.875 | -5.375  |
| ATOM | 451 | C    | ALA | 30 | 17.653 | -1.510 | -6.377  |
| ATOM | 452 | O    | ALA | 30 | 18.868 | -1.638 | -6.430  |
| ATOM | 453 | N    | ILE | 31 | 16.991 | -0.997 | -7.426  |
| ATOM | 454 | HN   | ILE | 31 | 16.007 | -0.941 | -7.355  |
| ATOM | 455 | CA   | ILE | 31 | 17.727 | -0.566 | -8.584  |
| ATOM | 456 | HA   | ILE | 31 | 18.439 | -1.199 | -8.892  |
| ATOM | 457 | CB   | ILE | 31 | 16.763 | -0.338 | -9.814  |

|      |     |      |     |    |        |        |         |
|------|-----|------|-----|----|--------|--------|---------|
| ATOM | 458 | HB   | ILE | 31 | 16.085 | 0.389  | -9.562  |
| ATOM | 459 | CG2  | ILE | 31 | 17.490 | 0.009  | -11.142 |
| ATOM | 460 | HG21 | ILE | 31 | 18.055 | 0.879  | -11.074 |
| ATOM | 461 | HG22 | ILE | 31 | 18.156 | -0.691 | -11.362 |
| ATOM | 462 | HG23 | ILE | 31 | 16.822 | 0.065  | -11.901 |
| ATOM | 463 | CG1  | ILE | 31 | 16.046 | -1.642 | -9.985  |
| ATOM | 464 | HG11 | ILE | 31 | 15.468 | -1.833 | -9.237  |
| ATOM | 465 | HG12 | ILE | 31 | 16.732 | -2.429 | -10.052 |
| ATOM | 466 | CD1  | ILE | 31 | 15.175 | -1.705 | -11.235 |
| ATOM | 467 | HD11 | ILE | 31 | 14.549 | -0.971 | -11.179 |
| ATOM | 468 | HD12 | ILE | 31 | 15.770 | -1.559 | -12.026 |
| ATOM | 469 | HD13 | ILE | 31 | 14.743 | -2.592 | -11.219 |
| ATOM | 470 | C    | ILE | 31 | 18.345 | 0.789  | -8.275  |
| ATOM | 471 | O    | ILE | 31 | 19.493 | 1.119  | -8.640  |
| ATOM | 472 | N    | ILE | 32 | 17.656 | 1.662  | -7.499  |
| ATOM | 473 | HN   | ILE | 32 | 16.739 | 1.525  | -7.163  |
| ATOM | 474 | CA   | ILE | 32 | 18.218 | 2.886  | -7.148  |
| ATOM | 475 | HA   | ILE | 32 | 18.676 | 3.252  | -8.027  |
| ATOM | 476 | CB   | ILE | 32 | 17.103 | 3.894  | -6.758  |
| ATOM | 477 | HB   | ILE | 32 | 16.610 | 3.669  | -5.909  |
| ATOM | 478 | CG2  | ILE | 32 | 17.690 | 5.318  | -6.656  |
| ATOM | 479 | HG21 | ILE | 32 | 16.994 | 5.930  | -6.399  |
| ATOM | 480 | HG22 | ILE | 32 | 18.439 | 5.344  | -5.958  |
| ATOM | 481 | HG23 | ILE | 32 | 18.107 | 5.585  | -7.537  |
| ATOM | 482 | CG1  | ILE | 32 | 16.142 | 3.887  | -7.994  |
| ATOM | 483 | HG11 | ILE | 32 | 15.721 | 2.946  | -8.074  |
| ATOM | 484 | HG12 | ILE | 32 | 16.541 | 4.125  | -8.833  |
| ATOM | 485 | CD1  | ILE | 32 | 15.083 | 4.960  | -7.680  |
| ATOM | 486 | HD11 | ILE | 32 | 15.553 | 5.785  | -7.535  |
| ATOM | 487 | HD12 | ILE | 32 | 14.426 | 5.014  | -8.406  |
| ATOM | 488 | HD13 | ILE | 32 | 14.556 | 4.773  | -6.830  |
| ATOM | 489 | C    | ILE | 32 | 19.322 | 2.609  | -6.134  |
| ATOM | 490 | O    | ILE | 32 | 20.302 | 3.329  | -6.104  |
| ATOM | 491 | N    | GLY | 33 | 19.290 | 1.588  | -5.230  |
| ATOM | 492 | HN   | GLY | 33 | 18.596 | 0.912  | -5.164  |
| ATOM | 493 | CA   | GLY | 33 | 20.342 | 1.423  | -4.300  |
| ATOM | 494 | HA1  | GLY | 33 | 20.129 | 0.990  | -3.423  |
| ATOM | 495 | HA2  | GLY | 33 | 20.662 | 2.313  | -4.074  |
| ATOM | 496 | C    | GLY | 33 | 21.477 | 0.771  | -5.094  |
| ATOM | 497 | O    | GLY | 33 | 22.640 | 1.016  | -4.787  |
| ATOM | 498 | N    | LEU | 34 | 21.300 | -0.033 | -6.138  |
| ATOM | 499 | HN   | LEU | 34 | 20.372 | -0.281 | -6.440  |
| ATOM | 500 | CA   | LEU | 34 | 22.479 | -0.530 | -6.758  |
| ATOM | 501 | HA   | LEU | 34 | 23.163 | -0.749 | -6.074  |
| ATOM | 502 | CB   | LEU | 34 | 22.315 | -1.832 | -7.559  |
| ATOM | 503 | HB1  | LEU | 34 | 23.177 | -2.099 | -7.989  |
| ATOM | 504 | HB2  | LEU | 34 | 21.593 | -1.712 | -8.268  |
| ATOM | 505 | CG   | LEU | 34 | 22.040 | -2.946 | -6.430  |
| ATOM | 506 | HG   | LEU | 34 | 21.130 | -2.872 | -6.038  |



|      |     |      |     |    |        |        |         |
|------|-----|------|-----|----|--------|--------|---------|
| ATOM | 507 | CD1  | LEU | 34 | 22.133 | -4.275 | -7.142  |
| ATOM | 508 | HD11 | LEU | 34 | 21.493 | -4.321 | -7.907  |
| ATOM | 509 | HD12 | LEU | 34 | 23.069 | -4.405 | -7.539  |
| ATOM | 510 | HD13 | LEU | 34 | 21.945 | -5.000 | -6.534  |
| ATOM | 511 | CD2  | LEU | 34 | 23.109 | -2.900 | -5.298  |
| ATOM | 512 | HD21 | LEU | 34 | 23.111 | -2.051 | -4.726  |
| ATOM | 513 | HD22 | LEU | 34 | 22.962 | -3.650 | -4.682  |
| ATOM | 514 | HD23 | LEU | 34 | 24.032 | -3.001 | -5.621  |
| ATOM | 515 | C    | LEU | 34 | 23.058 | 0.506  | -7.667  |
| ATOM | 516 | O    | LEU | 34 | 24.263 | 0.454  | -7.940  |
| ATOM | 517 | N    | MET | 35 | 22.325 | 1.561  | -8.182  |
| ATOM | 518 | HN   | MET | 35 | 21.336 | 1.634  | -8.012  |
| ATOM | 519 | CA   | MET | 35 | 23.002 | 2.572  | -9.018  |
| ATOM | 520 | HA   | MET | 35 | 23.757 | 2.121  | -9.536  |
| ATOM | 521 | CB   | MET | 35 | 22.121 | 3.278  | -9.983  |
| ATOM | 522 | HB1  | MET | 35 | 22.696 | 3.948  | -10.340 |
| ATOM | 523 | HB2  | MET | 35 | 21.429 | 3.752  | -9.444  |
| ATOM | 524 | CG   | MET | 35 | 21.517 | 2.318  | -11.087 |
| ATOM | 525 | HG1  | MET | 35 | 20.920 | 1.585  | -10.765 |
| ATOM | 526 | HG2  | MET | 35 | 22.291 | 1.979  | -11.620 |
| ATOM | 527 | SD   | MET | 35 | 20.313 | 3.180  | -12.167 |
| ATOM | 528 | CE   | MET | 35 | 19.196 | 3.900  | -10.873 |
| ATOM | 529 | HE1  | MET | 35 | 18.583 | 4.542  | -11.387 |
| ATOM | 530 | HE2  | MET | 35 | 18.736 | 3.039  | -10.549 |
| ATOM | 531 | HE3  | MET | 35 | 19.608 | 4.390  | -10.098 |
| ATOM | 532 | C    | MET | 35 | 23.650 | 3.605  | -8.092  |
| ATOM | 533 | O    | MET | 35 | 24.628 | 4.161  | -8.597  |
| ATOM | 534 | N    | VAL | 36 | 23.150 | 3.809  | -6.871  |
| ATOM | 535 | HN   | VAL | 36 | 22.348 | 3.351  | -6.527  |
| ATOM | 536 | CA   | VAL | 36 | 23.810 | 4.760  | -6.014  |
| ATOM | 537 | HA   | VAL | 36 | 24.072 | 5.475  | -6.658  |
| ATOM | 538 | CB   | VAL | 36 | 22.885 | 5.329  | -4.950  |
| ATOM | 539 | HB   | VAL | 36 | 22.428 | 4.635  | -4.381  |
| ATOM | 540 | CG1  | VAL | 36 | 23.534 | 6.331  | -3.956  |
| ATOM | 541 | HG11 | VAL | 36 | 22.870 | 6.602  | -3.330  |
| ATOM | 542 | HG12 | VAL | 36 | 24.289 | 5.868  | -3.413  |
| ATOM | 543 | HG13 | VAL | 36 | 23.869 | 7.038  | -4.479  |
| ATOM | 544 | CG2  | VAL | 36 | 21.887 | 6.121  | -5.757  |
| ATOM | 545 | HG21 | VAL | 36 | 21.247 | 6.488  | -5.121  |
| ATOM | 546 | HG22 | VAL | 36 | 22.438 | 6.859  | -6.200  |
| ATOM | 547 | HG23 | VAL | 36 | 21.363 | 5.587  | -6.447  |
| ATOM | 548 | C    | VAL | 36 | 25.020 | 3.995  | -5.423  |
| ATOM | 549 | O    | VAL | 36 | 26.043 | 4.649  | -5.145  |
| ATOM | 550 | N    | GLY | 37 | 24.984 | 2.654  | -5.235  |
| ATOM | 551 | HN   | GLY | 37 | 24.191 | 2.111  | -5.441  |
| ATOM | 552 | CA   | GLY | 37 | 26.179 | 2.011  | -4.707  |
| ATOM | 553 | HA1  | GLY | 37 | 25.884 | 1.159  | -4.328  |
| ATOM | 554 | HA2  | GLY | 37 | 26.628 | 2.542  | -4.010  |
| ATOM | 555 | C    | GLY | 37 | 27.178 | 1.676  | -5.788  |

|      |     |         |     |        |        |         |         |
|------|-----|---------|-----|--------|--------|---------|---------|
| ATOM | 556 | O       | GLY | 37     | 28.335 | 2.119   | -5.691  |
| ATOM | 557 | N       | GLY | 38     | 26.879 | 0.906   | -6.866  |
| ATOM | 558 | HN      | GLY | 38     | 26.045 | 0.473   | -7.131  |
| ATOM | 559 | CA      | GLY | 38     | 27.976 | 0.656   | -7.742  |
| ATOM | 560 | HA1     | GLY | 38     | 28.875 | 0.919   | -7.299  |
| ATOM | 561 | HA2     | GLY | 38     | 27.861 | 1.118   | -8.611  |
| ATOM | 562 | C       | GLY | 38     | 27.805 | -0.807  | -7.780  |
| ATOM | 563 | O       | GLY | 38     | 26.615 | -1.299  | -7.764  |
| ATOM | 564 | N       | VAL | 39     | 28.804 | -1.669  | -7.755  |
| ATOM | 565 | HN      | VAL | 39     | 29.756 | -1.560  | -7.693  |
| ATOM | 566 | CA      | VAL | 39     | 28.424 | -3.070  | -7.829  |
| ATOM | 567 | HA      | VAL | 39     | 27.411 | -3.283  | -7.944  |
| ATOM | 568 | CB      | VAL | 39     | 29.279 | -3.724  | -8.932  |
| ATOM | 569 | HB      | VAL | 39     | 30.228 | -3.449  | -8.734  |
| ATOM | 570 | CG1     | VAL | 39     | 29.180 | -5.220  | -8.863  |
| ATOM | 571 | HG11VAL | 39  | 29.787 | -5.645 | -9.612  |         |
| ATOM | 572 | HG12VAL | 39  | 29.482 | -5.417 | -7.918  |         |
| ATOM | 573 | HG13VAL | 39  | 28.212 | -5.473 | -8.991  |         |
| ATOM | 574 | CG2     | VAL | 39     | 28.873 | -3.212  | -10.328 |
| ATOM | 575 | HG21VAL | 39  | 29.019 | -2.239 | -10.342 |         |
| ATOM | 576 | HG22VAL | 39  | 29.533 | -3.684 | -10.944 |         |
| ATOM | 577 | HG23VAL | 39  | 27.959 | -3.445 | -10.564 |         |
| ATOM | 578 | C       | VAL | 39     | 28.893 | -3.386  | -6.497  |
| ATOM | 579 | O       | VAL | 39     | 29.887 | -2.712  | -6.061  |
| ATOM | 580 | N       | VAL | 40     | 28.255 | -4.205  | -5.705  |
| ATOM | 581 | HN      | VAL | 40     | 27.422 | -4.765  | -5.904  |
| ATOM | 582 | CA      | VAL | 40     | 28.738 | -4.383  | -4.349  |
| ATOM | 583 | HA      | VAL | 40     | 29.582 | -3.872  | -4.294  |
| ATOM | 584 | CB      | VAL | 40     | 27.736 | -3.916  | -3.343  |
| ATOM | 585 | HB      | VAL | 40     | 26.893 | -4.466  | -3.496  |
| ATOM | 586 | CG1     | VAL | 40     | 28.245 | -3.959  | -1.873  |
| ATOM | 587 | HG11VAL | 40  | 27.482 | -3.708 | -1.291  |         |
| ATOM | 588 | HG12VAL | 40  | 28.552 | -4.868 | -1.686  |         |
| ATOM | 589 | HG13VAL | 40  | 29.012 | -3.338 | -1.768  |         |
| ATOM | 590 | CG2     | VAL | 40     | 27.320 | -2.471  | -3.599  |
| ATOM | 591 | HG21VAL | 40  | 26.706 | -2.170 | -2.868  |         |
| ATOM | 592 | HG22VAL | 40  | 28.127 | -1.933 | -3.755  |         |
| ATOM | 593 | HG23VAL | 40  | 26.841 | -2.379 | -4.459  |         |
| ATOM | 594 | C       | VAL | 40     | 28.842 | -5.847  | -4.271  |
| ATOM | 595 | O       | VAL | 40     | 28.291 | -6.392  | -5.218  |
| ATOM | 596 | NA      | NA  | 41     | -2.881 | 18.414  | -9.029  |
| ATOM | 597 | NA      | NA  | 42     | 2.706  | 5.783   | -3.510  |
| ATOM | 598 | NA      | NA  | 43     | -5.774 | 17.466  | -9.719  |
